# Supplementary material
Source: MDPI journal article supplement (https://www.mdpi.com/2071-1050/10/5/1563)
Supplement: s1 [file s1]

## Sheet: Table S1
Supplementary Material 1 - Spearman correlation coefficients for the 66 indicators
			Under-5 mortality rate (per 1,000 live births)	Infant mortality rate (per 1,000 live births)	Neonatal mortality rate (per 1,000 live births)	Percentage of infants born with low birth weight (&lt;2500g.)	Underweight (moderate and severe, %)	Overweight (including obesity, %)	Wasting (moderate and severe, %)	Stunting (moderate and severe, %)	Exclusive breastfeeding &lt;6 months (%)	DMFT (decayed, missing or filled teeth) among 12-year-olds (number)	Suicide rate, 15-29 year-olds, per 100000	Mortality rate attributed to household and ambient air pollution (per 100 000 population)	PM2.5 air pollution, population exposed to levels exceeding WHO guideline value (% of total)	Estimated percentage of young men and women (aged 15–24) living with HIV as of 2013	Diphtheria tetanus toxoid and pertussis (DTP3) immunization coverage among 1-year-olds (%)	Measles (MCV) immunization coverage among 1-year-olds (%)	Polio (Pol3) immunization coverage among 1-year-olds (%)	Hepatitis B (HepB3) immunization coverage among 1-year-olds (%)	Bacillus Calmette-Guérin (BCG) immunization	Comparable estimates of prevalence of insufficient physical activity (adolescents 11-17 years)	15-19 years old heavy episodic drinkers (population), % by country	Adolescent fertility rate (per 1000 girls aged 15-19 years)	Percentage of births attended by skilled health personnel (doctor, nurse or midwife)	Percentage of women aged 15–49 years attended at least 4 times during pregnancy by skilled health personnel (doctor, nurse or midwife)	Maternal mortality ratio (MMR, maternal deaths per 100 000 live births)	Health expenditure, public (% of total health expenditure)	Improved sanitation facilities (% of population with access)	Population using improved drinking-water sources (%)	Youth literacy rate, population 15-24 years, both sexes (%)	Repetition rate in primary education (all grades), both sexes (%)	Gross graduation ratio from primary education, both sexes (%)	Gross graduation ratio from lower secondary education, both sexes (%)	Gross graduation ratio from first degree programmes (ISCED 6 and 7) in tertiary education, both sexes (%)	Gross enrolment ratio, pre-primary, both sexes (%)	Gross enrolment ratio, primary, both sexes (%)	Gross enrolment ratio, secondary, both sexes (%)	Gross enrolment ratio, tertiary, both sexes (%)	Government expenditure on education as % of GDP (%)	Gross enrolment ratio, pri-primary, gender parity index (GPI)	Gross enrolment ratio, primary, gender parity index (GPI)	Gross enrolment ratio, secondary, gender parity index (GPI)	Gross enrolment ratio, tertiary, gender parity index (GPI)	Gross graduation ratio from primary education, gender parity index (GPI)	Gross graduation ratio from lower secondary education, gender parity index (GPI)	Gross graduation ratio from first degree programmes (ISCED 6 and 7) in tertiary education, gender parity index (GPI)	Youth literacy rate, population 15-24 years, gender parity index (GPI)	Juveniles Held in Prisons, Penal Institutions or Correctional Institutions, rate per 100,000 juveniles aged 17 or under
Spearman coefficient	Under-5 mortality rate (per 1,000 live births)	Correlation Coefficient	1	,998**	,985**	,645**	,756**	-,427**	,513**	,798**	,367**	-,174*	0.0724067	,500**	0.114798	,563**	-,537**	-,491**	-,521**	-,452**	-,330**	,269**	-,629**	,791**	-,829**	-,772**	,937**	-,467**	-,862**	-,849**	-,809**	,642**	-,615**	-,737**	-,591**	-,648**	0.14127	-,830**	-,832**	-,168*	,252**	-,392**	-,375**	-,630**	-,323**	-,298**	-,554**	-,309**	-0.0224476
		Sig. (2-tailed)		1.97725e-242	1.28576e-148	2.70206e-23	1.22383e-28	7.60035e-08	3.19878e-11	1.09252e-33	1.0762e-06	0.0196346	0.346637	1.59163e-13	0.117703	4.36976e-12	5.72536e-16	2.99335e-13	5.66374e-15	9.55986e-11	1.56219e-05	0.00300897	3.16354e-22	1.10054e-40	8.55775e-44	1.08072e-30	7.40237e-85	1.08403e-11	1.00467e-57	1.0937e-54	3.41926e-36	1.64209e-20	2.1598e-15	2.92768e-25	5.2577e-15	9.00237e-24	0.0512522	2.339e-49	9.56933e-48	0.0242355	0.000496496	1.97538e-08	1.02363e-07	3.45004e-21	0.000138216	0.000472086	2.2741e-12	0.000109777	0.817628
		N	195	195	195	186	148	146	147	147	167	180	171	192	187	128	195	195	195	186	164	120	189	184	168	149	183	190	191	193	151	165	135	140	145	188	191	189	181	179	187	191	189	179	134	134	137	152	108
	Infant mortality rate (per 1,000 live births)	Correlation Coefficient	,998**	1	,986**	,645**	,751**	-,415**	,517**	,793**	,357**	-,173*	0.0675519	,498**	0.113658	,554**	-,536**	-,491**	-,519**	-,450**	-,325**	,267**	-,624**	,781**	-,823**	-,773**	,932**	-,467**	-,853**	-,845**	-,798**	,632**	-,606**	-,735**	-,593**	-,650**	0.136252	-,826**	-,829**	-,162*	,246**	-,393**	-,371**	-,627**	-,318**	-,294**	-,555**	-,305**	-0.0254352
		Sig. (2-tailed)	1.97725e-242		1.39791e-153	2.68189e-23	4.17526e-28	1.83737e-07	2.00445e-11	5.44975e-33	2.23519e-06	0.0201866	0.380009	1.97657e-13	0.121419	1.11547e-11	7.22579e-16	3.11752e-13	7.49107e-15	1.14686e-10	2.1131e-05	0.00318345	9.16435e-22	4.60335e-39	1.39593e-42	7.76192e-31	1.56562e-81	1.06247e-11	3.41479e-55	7.43453e-54	1.41212e-34	8.30709e-20	6.59027e-15	4.62983e-25	3.98886e-15	5.92779e-24	0.0601832	2.00161e-48	4.41176e-47	0.0300933	0.0006849	1.8478e-08	1.44108e-07	5.59239e-21	0.000180064	0.000566398	1.93292e-12	0.000134434	0.793864
		N	195	195	195	186	148	146	147	147	167	180	171	192	187	128	195	195	195	186	164	120	189	184	168	149	183	190	191	193	151	165	135	140	145	188	191	189	181	179	187	191	189	179	134	134	137	152	108
	Neonatal mortality rate (per 1,000 live births)	Correlation Coefficient	,985**	,986**	1	,647**	,743**	-,442**	,523**	,762**	,335**	-,159*	0.0739372	,492**	0.131146	,521**	-,533**	-,481**	-,527**	-,453**	-,309**	,241**	-,611**	,763**	-,808**	-,770**	,920**	-,475**	-,841**	-,831**	-,790**	,609**	-,602**	-,719**	-,586**	-,626**	0.123413	-,814**	-,803**	-,165*	,230**	-,384**	-,369**	-,622**	-,338**	-,290**	-,557**	-,310**	0.00233199
		Sig. (2-tailed)	1.28576e-148	1.39791e-153		1.7436e-23	3.28831e-27	2.40979e-08	1.0503e-11	3.92662e-29	9.45471e-06	0.0326345	0.336513	4.00324e-13	0.0735979	2.91111e-10	1.1249e-15	1.16825e-12	2.37545e-15	8.28067e-11	5.67208e-05	0.00810112	1.07351e-20	2.6879e-36	5.09679e-40	1.81171e-30	2.37994e-75	4.43891e-12	2.08508e-52	1.78705e-50	2.10755e-33	3.72754e-18	1.18815e-14	1.45377e-23	9.748e-15	6.87014e-22	0.0889602	4.592e-46	4.07989e-42	0.0270831	0.00153346	4.25369e-08	1.75561e-07	1.43206e-20	6.66116e-05	0.000673595	1.5226e-12	0.000100684	0.98089
		N	195	195	195	186	148	146	147	147	167	180	171	192	187	128	195	195	195	186	164	120	189	184	168	149	183	190	191	193	151	165	135	140	145	188	191	189	181	179	187	191	189	179	134	134	137	152	108
	Percentage of infants born with low birth weight (&lt;2500g.)	Correlation Coefficient	,645**	,645**	,647**	1	,677**	-,498**	,577**	,562**	,164*	-,232**	-0.128558	0.134691	0.104546	,302**	-,434**	-,427**	-,414**	-,380**	-,269**	,205*	-,556**	,595**	-,651**	-,573**	,661**	-,387**	-,589**	-,532**	-,676**	,575**	-,459**	-,636**	-,570**	-,430**	0.0429721	-,651**	-,605**	-,194*	,253**	-,279**	-,254**	-,418**	-,192*	-,180*	-,456**	-,247**	0.0858087
		Sig. (2-tailed)	2.70206e-23	2.68189e-23	1.7436e-23		1.63964e-20	3.39768e-10	5.43711e-14	3.25831e-13	0.0364723	0.00204419	0.0977743	0.0683188	0.162505	0.000606773	6.03694e-10	1.232e-09	4.14489e-09	1.89176e-07	0.000700785	0.0273847	3.98541e-16	2.06255e-18	9.50283e-21	4.91306e-14	1.03148e-23	5.49537e-08	1.84285e-18	8.13569e-15	8.14956e-21	9.3608e-16	3.21254e-08	6.67196e-17	1.27809e-13	1.54262e-09	0.563534	3.14033e-23	5.80502e-19	0.0106602	0.000599623	0.000133914	0.000554236	9.11568e-09	0.0279842	0.04017	2.98994e-08	0.00251299	0.384104
		N	186	186	186	186	143	141	142	142	163	174	167	184	180	125	186	186	186	177	156	116	182	178	161	145	178	185	183	184	146	163	132	137	142	181	183	181	176	172	180	183	181	174	131	131	134	147	105
	Underweight (moderate and severe, %)	Correlation Coefficient	,756**	,751**	,743**	,677**	1	-,536**	,811**	,888**	,324**	-,310**	0.107529	,356**	0.114768	,235*	-,408**	-,429**	-,392**	-,378**	-,427**	0.171908	-,556**	,481**	-,762**	-,707**	,736**	-,361**	-,709**	-,645**	-,699**	,555**	-,501**	-,600**	-,539**	-,470**	0.0683963	-,709**	-,704**	-,245**	,190*	-,272**	-,394**	-,569**	-,318**	-,375**	-,532**	-,352**	-,277*
		Sig. (2-tailed)	1.22383e-28	4.17526e-28	3.28831e-27	1.63964e-20		3.78935e-12	1.3666e-35	7.18837e-51	0.000107357	0.000214554	0.209359	9.09282e-06	0.167775	0.0112435	2.59229e-07	5.47525e-08	8.46872e-07	2.39729e-06	1.43676e-07	0.124888	3.05494e-13	7.7339e-10	3.71538e-28	5.16844e-22	5.52918e-26	7.47658e-06	1.23667e-23	1.23429e-18	7.92008e-21	5.74983e-12	9.80498e-09	1.08887e-12	1.47202e-09	3.25222e-09	0.412049	2.7944e-23	3.04548e-22	0.00434161	0.0235306	0.000880137	1.02428e-06	2.69146e-13	0.000543053	4.89364e-05	1.01948e-08	3.09953e-05	0.0195708
		N	148	148	148	143	148	145	147	147	138	138	138	148	146	116	148	148	148	147	140	81	146	146	142	137	145	146	146	147	133	131	116	116	109	143	146	144	140	134	142	146	144	139	115	111	101	134	71
	Overweight (including obesity, %)	Correlation Coefficient	-,427**	-,415**	-,442**	-,498**	-,536**	1	-,319**	-,360**	-,271**	,264**	-,181*	-0.135103	-0.0682242	-,200*	,172*	,173*	,165*	,189*	,248**	-,257*	,234**	-,329**	,527**	,361**	-,480**	,177*	,424**	,346**	,487**	-,300**	,383**	,421**	,284**	0.143203	0.00910778	,462**	,410**	0.126909	-,214*	0.0795022	,286**	,428**	,204*	,246**	,374**	,306**	0.219823
		Sig. (2-tailed)	7.60035e-08	1.83737e-07	2.40979e-08	3.39768e-10	3.78935e-12		9.48582e-05	9.15796e-06	0.001391	0.00189728	0.0345833	0.103974	0.416503	0.0326179	0.0381581	0.0367019	0.0470508	0.0226446	0.00349583	0.0197087	0.00469654	5.76729e-05	2.34805e-11	1.71627e-05	1.25394e-09	0.034099	1.16423e-07	2.02217e-05	4.18218e-09	0.000561267	2.64843e-05	2.78009e-06	0.00290465	0.0902573	0.913724	6.96726e-09	5.90137e-07	0.147037	0.0110946	0.343531	0.000568121	1.80559e-07	0.0300188	0.00968995	0.000123928	0.000378627	0.0654773
		N	146	146	146	141	145	146	144	144	136	136	136	146	144	114	146	146	146	145	137	82	144	144	140	135	143	144	144	145	130	129	114	115	108	141	144	142	138	132	140	144	142	137	113	110	100	131	71
	Wasting (moderate and severe, %)	Correlation Coefficient	,513**	,517**	,523**	,577**	,811**	-,319**	1	,610**	0.0624707	-,186*	-0.101304	,296**	,185*	0.0406309	-,261**	-,362**	-,289**	-,247**	-,318**	0.114499	-,525**	,239**	-,497**	-,586**	,475**	-,301**	-,412**	-,430**	-,478**	,348**	-,331**	-,417**	-,373**	-,413**	-0.0791403	-,486**	-,494**	-,258**	0.0640344	-,234**	-,329**	-,376**	-,300**	-,279**	-,353**	-,348**	-,254*
		Sig. (2-tailed)	3.19878e-11	2.00445e-11	1.0503e-11	5.43711e-14	1.3666e-35	9.48582e-05		2.22758e-16	0.468323	0.029411	0.237098	0.000277704	0.0258254	0.66498	0.00143879	6.62044e-06	0.000381608	0.00266975	0.000139754	0.311863	1.24811e-11	0.00381284	3.55344e-10	6.49585e-14	1.83628e-09	0.000234357	2.59927e-07	6.28654e-08	5.77839e-09	4.53037e-05	0.000278657	3.20029e-06	6.45096e-05	3.36316e-07	0.34404	7.74189e-10	5.57433e-10	0.00273166	0.448995	0.0045519	6.09673e-05	5.01735e-06	0.00114405	0.00303938	0.000289914	3.77766e-05	0.0328084
		N	147	147	147	142	147	144	147	147	137	137	138	147	145	116	147	147	147	146	139	80	145	145	141	136	144	145	145	146	133	131	116	116	109	142	145	143	140	133	142	145	143	139	115	111	101	134	71
	Stunting (moderate and severe, %)	Correlation Coefficient	,798**	,793**	,762**	,562**	,888**	-,360**	,610**	1	,398**	-,251**	0.164706	,400**	0.0797726	,292**	-,474**	-,448**	-,438**	-,429**	-,466**	0.200261	-,476**	,534**	-,782**	-,763**	,760**	-,381**	-,764**	-,710**	-,710**	,597**	-,535**	-,653**	-,450**	-,509**	0.124591	-,741**	-,703**	-,171*	0.155199	-,305**	-,428**	-,639**	-,283**	-,413**	-,589**	-,337**	-,300*
		Sig. (2-tailed)	1.09252e-33	5.44975e-33	3.92662e-29	3.25831e-13	7.18837e-51	9.15796e-06	2.22758e-16		1.46131e-06	0.0031308	0.0535488	5.14005e-07	0.340187	0.00148338	1.37274e-09	1.29503e-08	2.90949e-08	6.69484e-08	7.69843e-09	0.0748975	1.42179e-09	4.39772e-12	2.21659e-30	3.25336e-27	2.45384e-28	2.31746e-06	5.84047e-29	1.16096e-23	1.07323e-21	5.40052e-14	5.93391e-10	2.05752e-15	8.96934e-07	9.77261e-11	0.135407	4.11121e-26	3.39779e-22	0.0487526	0.0651458	0.000195694	1.00369e-07	2.63957e-17	0.00215255	6.70522e-06	8.92869e-11	6.91639e-05	0.0110356
		N	147	147	147	142	147	144	147	147	137	137	138	147	145	116	147	147	147	146	139	80	145	145	141	136	144	145	145	146	133	131	116	116	109	142	145	143	140	133	142	145	143	139	115	111	101	134	71
	Exclusive breastfeeding &lt;6 months (%)	Correlation Coefficient	,367**	,357**	,335**	,164*	,324**	-,271**	0.0624707	,398**	1	-0.0964861	,159*	,219**	-0.0723704	0.123471	-0.0753853	-0.0584395	-0.0443227	0.0144634	0.0551198	,342**	-,322**	,276**	-,297**	-,179*	,394**	-0.13903	-,454**	-,350**	-,261**	,225**	-0.0267703	-0.131386	-,256**	-,182*	,304**	-,346**	-,396**	-0.111357	0.129237	0.0768865	0.00727235	-,291**	0.0671098	-0.0134101	-,383**	-0.0341837	0.00965662
		Sig. (2-tailed)	1.0762e-06	2.23519e-06	9.45471e-06	0.0364723	0.000107357	0.001391	0.468323	1.46131e-06		0.232358	0.0478565	0.00460961	0.357096	0.173645	0.332918	0.45315	0.569524	0.855956	0.511713	0.000576518	2.77461e-05	0.000354146	0.000219876	0.0360786	1.79328e-07	0.0758207	7.72638e-10	3.58007e-06	0.00195272	0.00659555	0.769754	0.144148	0.00370549	0.0199102	6.97982e-05	5.76909e-06	2.13925e-07	0.171995	0.101201	0.324827	0.926364	0.000208935	0.464553	0.884909	1.75514e-05	0.688451	0.927614
		N	167	167	167	163	138	136	137	137	167	155	155	166	164	123	167	167	167	160	144	98	163	163	150	137	164	164	166	167	139	144	122	125	127	163	166	164	160	152	162	166	164	158	121	119	119	140	91
	DMFT (decayed, missing or filled teeth) among 12-year-olds (number)	Correlation Coefficient	-,174*	-,173*	-,159*	-,232**	-,310**	,264**	-,186*	-,251**	-0.0964861	1	0.072278	0.122907	0.107591	-,329**	-0.0676835	0.0554215	-0.0372889	-0.0284725	0.0439164	-0.0628874	0.138118	-0.0484356	,286**	,226**	-,173*	0.0344273	0.124709	0.115378	,316**	-,167*	0.159091	0.149052	0.138479	0.0248104	-0.0379834	,160*	,225**	-,199*	-0.11371	0.0222333	0.0685323	,175*	0.0602545	,185*	,200*	0.070708	0.136927
		Sig. (2-tailed)	0.0196346	0.0201866	0.0326345	0.00204419	0.000214554	0.00189728	0.029411	0.0031308	0.232358		0.359204	0.102167	0.155224	0.00023083	0.366643	0.45994	0.61921	0.711628	0.592354	0.498704	0.0659804	0.524434	0.000303075	0.00807767	0.0228545	0.65011	0.099127	0.125124	0.000144306	0.0389133	0.0751836	0.0892951	0.105281	0.744493	0.614702	0.0341883	0.00313848	0.0101007	0.135181	0.768318	0.366118	0.0235864	0.502715	0.0385449	0.0227923	0.404743	0.167832
		N	180	180	180	174	138	136	137	137	155	180	163	178	176	121	180	180	180	171	151	118	178	175	155	136	173	176	176	178	140	153	126	131	138	175	178	176	170	166	174	178	176	168	126	126	130	141	103
	Suicide rate, 15-29 year-olds, per 100000	Correlation Coefficient	0.0724067	0.0675519	0.0739372	-0.128558	0.107529	-,181*	-0.101304	0.164706	,159*	0.072278	1	,177*	-0.149218	,191*	-0.0296069	0.0335342	-0.0372864	-0.0595319	-0.117388	-0.0676815	,171*	0.097276	-0.113066	-0.0728105	0.102698	0.00134226	-0.127632	-0.0861371	-0.0736425	0.0366472	-0.171539	0.0349909	0.104268	0.0730773	0.0134324	-0.0261075	-0.0247147	-0.022686	-0.0507978	0.0766013	-0.150537	-0.13598	0.022979	-0.108492	-0.127409	0.0464469	-0.0913739
		Sig. (2-tailed)	0.346637	0.380009	0.336513	0.0977743	0.209359	0.0345833	0.237098	0.0535488	0.0478565	0.359204		0.0203827	0.0514285	0.0315188	0.700679	0.663256	0.628261	0.45174	0.159672	0.494822	0.0266467	0.205612	0.17124	0.401341	0.181342	0.98614	0.0992101	0.264045	0.382067	0.656154	0.0578117	0.698461	0.2253	0.349442	0.86239	0.737696	0.752685	0.776534	0.515719	0.322232	0.0521573	0.0825382	0.802449	0.238191	0.148585	0.580398	0.361048
		N	171	171	171	167	138	136	138	138	155	163	171	171	171	127	171	171	171	162	145	104	169	171	148	135	171	170	168	170	143	150	123	125	137	166	169	167	165	159	166	169	167	164	121	120	130	144	102
	Mortality rate attributed to household and ambient air pollution (per 100 000 population)	Correlation Coefficient	,500**	,498**	,492**	0.134691	,356**	-0.135103	,296**	,400**	,219**	0.122907	,177*	1	,318**	0.153972	-,328**	-,339**	-,319**	-,281**	-,245**	-0.0585357	-,178*	,323**	-,317**	-,322**	,449**	-,428**	-,555**	-,458**	-,229**	0.046894	-,266**	-,176*	-,193*	-,428**	-0.0656824	-,444**	-,340**	-,319**	-0.0548549	-0.138258	-,418**	-,457**	-,203*	-,370**	-,370**	-,297**	-0.0911056
		Sig. (2-tailed)	1.59163e-13	1.97657e-13	4.00324e-13	0.0683188	9.09282e-06	0.103974	0.000277704	5.14005e-07	0.00460961	0.102167	0.0203827		8.97187e-06	0.0826923	3.45924e-06	1.50655e-06	6.28101e-06	0.000118745	0.00168336	0.527157	0.0145905	7.59646e-06	3.13053e-05	6.59066e-05	1.95897e-10	9.15847e-10	1.17319e-16	2.69933e-11	0.00487831	0.55223	0.00195297	0.039122	0.0207752	1.17448e-09	0.370491	2.25488e-10	3.32277e-06	1.60696e-05	0.459559	0.0584711	2.79897e-09	1.74148e-10	0.0195818	1.29835e-05	9.36256e-06	0.000211594	0.352992
		N	192	192	192	184	148	146	147	147	166	178	171	192	187	128	192	192	192	183	162	119	188	184	166	148	182	188	189	191	150	163	133	138	144	185	188	186	178	176	184	188	186	176	132	132	136	151	106
	PM2.5 air pollution, population exposed to levels exceeding WHO guideline value (% of total)	Correlation Coefficient	0.114798	0.113658	0.131146	0.104546	0.114768	-0.0682242	,185*	0.0797726	-0.0723704	0.107591	-0.149218	,318**	1	0.0331382	0.0589862	0.0591619	0.0628381	0.131339	0.109534	-0.0551967	-,256**	0.0328812	-0.0173481	-0.117241	0.0761399	-,266**	-0.0561401	-0.11635	-0.0182205	-0.018269	-,229**	-0.112496	-,180*	-,222**	-0.119154	-,181*	-,162*	-,245**	-0.014656	-0.0996117	-,278**	-,151*	-,231**	-,213*	-0.0444464	-,259**	0.0359442
		Sig. (2-tailed)	0.117703	0.121419	0.0735979	0.162505	0.167775	0.416503	0.0258254	0.340187	0.357096	0.155224	0.0514285	8.97187e-06		0.710384	0.422602	0.421219	0.392894	0.0805487	0.170682	0.557943	0.000461619	0.658576	0.826563	0.160201	0.306975	0.000268348	0.449093	0.113769	0.825439	0.818641	0.00820025	0.192249	0.0322224	0.00267756	0.107176	0.0146546	0.0316665	0.0011316	0.84518	0.178516	0.000144376	0.0465662	0.00793813	0.0148398	0.610096	0.00137609	0.715838
		N	187	187	187	180	146	144	145	145	164	176	171	187	187	128	187	187	187	178	158	115	184	183	162	145	182	184	184	186	149	160	132	136	142	181	184	182	176	173	180	184	182	174	131	130	134	150	105
	Estimated percentage of young men and women (aged 15–24) living with HIV as of 2013	Correlation Coefficient	,563**	,554**	,521**	,302**	,235*	-,200*	0.0406309	,292**	0.123471	-,329**	,191*	0.153972	0.0331382	1	-,384**	-,359**	-,386**	-,337**	-0.172069	0.0771588	-,194*	,563**	-,343**	-,280**	,602**	-0.0803236	-,560**	-,391**	-,444**	,517**	-,472**	-,447**	-,367**	-,279**	0.0431848	-,495**	-,540**	0.0185129	0.115914	-,252**	-,241**	-,247**	-0.165421	-,209*	-,303**	0.0475166	0.167338
		Sig. (2-tailed)	4.36976e-12	1.11547e-11	2.91111e-10	0.000606773	0.0112435	0.0326179	0.66498	0.00148338	0.173645	0.00023083	0.0315188	0.0826923	0.710384		7.54778e-06	3.09195e-05	6.78828e-06	0.000131308	0.0635841	0.525506	0.0292994	4.65277e-12	0.000127077	0.00241779	5.35618e-14	0.369344	7.81178e-12	4.93793e-06	5.43799e-07	2.84616e-09	4.36666e-07	2.83655e-06	0.000175253	0.0017026	0.629748	4.37683e-09	7.90045e-11	0.840939	0.199838	0.00427522	0.00674276	0.00573134	0.0949436	0.0395537	0.00318257	0.610935	0.166168
		N	128	128	128	125	116	114	116	116	123	121	127	128	128	128	128	128	128	124	117	70	126	128	120	115	128	127	127	128	117	116	104	101	100	124	127	125	125	120	124	127	125	124	103	97	93	117	70
	Diphtheria tetanus toxoid and pertussis (DTP3) immunization coverage among 1-year-olds (%)	Correlation Coefficient	-,537**	-,536**	-,533**	-,434**	-,408**	,172*	-,261**	-,474**	-0.0753853	-0.0676835	-0.0296069	-,328**	0.0589862	-,384**	1	,855**	,948**	,945**	,708**	-0.110413	,296**	-,522**	,596**	,556**	-,558**	,307**	,587**	,500**	,546**	-,450**	,524**	,565**	,195*	,377**	-0.00185168	,559**	,413**	0.086216	-0.071452	,303**	,313**	,406**	,210*	,190*	,420**	,202*	0.117014
		Sig. (2-tailed)	5.72536e-16	7.22579e-16	1.1249e-15	6.03694e-10	2.59229e-07	0.0381581	0.00143879	1.37274e-09	0.332918	0.366643	0.700679	3.45924e-06	0.422602	7.54778e-06		4.57283e-57	6.98127e-98	6.6021e-91	3.00381e-26	0.229933	3.52603e-05	2.83884e-14	1.56326e-17	1.73685e-13	2.43835e-16	1.64783e-05	4.13657e-19	1.25173e-13	4.05505e-13	1.33222e-09	7.06701e-11	3.66606e-13	0.0187926	9.28177e-08	0.979718	5.83689e-17	7.33321e-09	0.251155	0.331159	2.08018e-05	1.12999e-05	1.65425e-08	0.015114	0.0278111	3.16777e-07	0.0127609	0.227803
		N	195	195	195	186	148	146	147	147	167	180	171	192	187	128	195	195	195	186	164	120	189	184	168	149	183	190	191	193	151	165	135	140	145	188	191	189	181	179	187	191	189	179	134	134	137	152	108
	Measles (MCV) immunization coverage among 1-year-olds (%)	Correlation Coefficient	-,491**	-,491**	-,481**	-,427**	-,429**	,173*	-,362**	-,448**	-0.0584395	0.0554215	0.0335342	-,339**	0.0591619	-,359**	,855**	1	,854**	,827**	,672**	-0.112483	,268**	-,438**	,607**	,570**	-,528**	,230**	,539**	,472**	,547**	-,440**	,523**	,575**	,220**	,376**	0.0159667	,570**	,423**	0.0601918	-0.0481463	,277**	,310**	,430**	,190*	,219*	,426**	,230**	,200*
		Sig. (2-tailed)	2.99335e-13	3.11752e-13	1.16825e-12	1.232e-09	5.47525e-08	0.0367019	6.62044e-06	1.29503e-08	0.45315	0.45994	0.663256	1.50655e-06	0.421219	3.09195e-05	4.57283e-57		1.06458e-56	6.54244e-48	6.9042e-23	0.221263	0.000190244	5.20345e-10	2.86452e-18	3.44875e-14	1.56367e-14	0.00137696	9.23469e-16	3.98919e-12	3.48859e-13	3.35752e-09	7.66755e-11	1.04238e-13	0.00785525	1.06834e-07	0.826471	1.18721e-17	3.09068e-09	0.423481	0.512883	0.000103935	1.46585e-05	1.85896e-09	0.0283075	0.0109582	2.048e-07	0.00428972	0.0382176
		N	195	195	195	186	148	146	147	147	167	180	171	192	187	128	195	195	195	186	164	120	189	184	168	149	183	190	191	193	151	165	135	140	145	188	191	189	181	179	187	191	189	179	134	134	137	152	108
	Polio (Pol3) immunization coverage among 1-year-olds (%)	Correlation Coefficient	-,521**	-,519**	-,527**	-,414**	-,392**	,165*	-,289**	-,438**	-0.0443227	-0.0372889	-0.0372864	-,319**	0.0628381	-,386**	,948**	,854**	1	,921**	,693**	-0.0451457	,278**	-,513**	,564**	,525**	-,550**	,289**	,574**	,494**	,543**	-,432**	,504**	,562**	,216**	,360**	0.0405732	,544**	,418**	0.111573	-0.0537145	,279**	,307**	,371**	,245**	,188*	,353**	,214**	0.0599226
		Sig. (2-tailed)	5.66374e-15	7.49107e-15	2.37545e-15	4.14489e-09	8.46872e-07	0.0470508	0.000381608	2.90949e-08	0.569524	0.61921	0.628261	6.28101e-06	0.392894	6.78828e-06	6.98127e-98	1.06458e-56		4.60957e-77	9.15741e-25	0.624403	0.000106186	9.35764e-14	1.63979e-15	6.3777e-12	7.8368e-16	5.4115e-05	4.24491e-18	2.9149e-13	5.84592e-13	6.58782e-09	4.76009e-10	5.09645e-13	0.0090864	3.9691e-07	0.577335	5.9984e-16	4.56642e-09	0.137033	0.465307	9.05202e-05	1.77852e-05	3.17901e-07	0.00425	0.0294751	2.30755e-05	0.00808815	0.537867
		N	195	195	195	186	148	146	147	147	167	180	171	192	187	128	195	195	195	186	164	120	189	184	168	149	183	190	191	193	151	165	135	140	145	188	191	189	181	179	187	191	189	179	134	134	137	152	108
	Hepatitis B (HepB3) immunization coverage among 1-year-olds (%)	Correlation Coefficient	-,452**	-,450**	-,453**	-,380**	-,378**	,189*	-,247**	-,429**	0.0144634	-0.0284725	-0.0595319	-,281**	0.131339	-,337**	,945**	,827**	,921**	1	,752**	-0.102373	,188*	-,443**	,561**	,475**	-,469**	,246**	,506**	,419**	,521**	-,417**	,494**	,516**	0.13318	,306**	0.00473038	,482**	,338**	0.054822	-0.0352801	,269**	,295**	,391**	,210*	,180*	,364**	,215**	0.141935
		Sig. (2-tailed)	9.55986e-11	1.14686e-10	8.28067e-11	1.89176e-07	2.39729e-06	0.0226446	0.00266975	6.69484e-08	0.855956	0.711628	0.45174	0.000118745	0.0805487	0.000131308	6.6021e-91	6.54244e-48	4.60957e-77		2.05368e-30	0.282787	0.0115492	8.27733e-10	4.04648e-15	9.44028e-10	6.74732e-11	0.000834808	3.06245e-13	3.18675e-09	9.44882e-12	4.05162e-08	1.71072e-09	1.55846e-10	0.12218	3.12647e-05	0.949466	7.68756e-12	5.92991e-06	0.477672	0.640124	0.000235203	5.83858e-05	1.31913e-07	0.0163026	0.0410002	2.41819e-05	0.00823976	0.161092
		N	186	186	186	177	147	145	146	146	160	171	162	183	178	124	186	186	186	186	160	112	180	175	166	149	174	181	182	184	149	160	132	135	136	179	182	180	172	170	178	182	180	170	131	129	128	150	99
	Bacillus Calmette-Guérin (BCG) immunization	Correlation Coefficient	-,330**	-,325**	-,309**	-,269**	-,427**	,248**	-,318**	-,466**	0.0551198	0.0439164	-0.117388	-,245**	0.109534	-0.172069	,708**	,672**	,693**	,752**	1	-0.0765094	0.124975	-,274**	,450**	,462**	-,359**	,244**	,367**	,309**	,420**	-,354**	,442**	,403**	0.0745899	,237**	0.0114173	,346**	,245**	-0.00338614	0.0369021	,217**	,385**	,411**	,268**	,328**	,338**	,227**	,283**
		Sig. (2-tailed)	1.56219e-05	2.1131e-05	5.67208e-05	0.000700785	1.43676e-07	0.00349583	0.000139754	7.69843e-09	0.511713	0.592354	0.159672	0.00168336	0.170682	0.0635841	3.00381e-26	6.9042e-23	9.15741e-25	2.05368e-30		0.46605	0.116507	0.000524856	3.7061e-09	1.54059e-08	4.09261e-06	0.00193075	1.55381e-06	6.06144e-05	2.09864e-07	1.38039e-05	3.35182e-07	2.90641e-06	0.420119	0.00268305	0.885702	7.81836e-06	0.00237137	0.967308	0.646347	0.00571396	5.34124e-07	1.69892e-07	0.00300935	0.000249672	0.00028486	0.00659552	0.00952376
		N	164	164	164	156	140	137	139	139	144	151	145	162	158	117	164	164	164	160	164	93	159	156	156	136	156	159	162	163	141	144	122	126	119	158	161	159	152	149	157	161	159	150	121	120	111	142	83
	Comparable estimates of prevalence of insufficient physical activity (adolescents 11-17 years)	Correlation Coefficient	,269**	,267**	,241**	,205*	0.171908	-,257*	0.114499	0.200261	,342**	-0.0628874	-0.0676815	-0.0585357	-0.0551967	0.0771588	-0.110413	-0.112483	-0.0451457	-0.102373	-0.0765094	1	-,254**	,193*	-,309**	-,267*	,265**	-0.078842	-0.169001	-,236**	-,270*	0.0745606	-0.0760694	-0.18846	-0.187961	-0.0855589	0.177601	-,196*	-,267**	-0.0747896	0.0656571	-0.0723343	-0.00620114	-,211*	0.0521106	0.0393962	-,218*	0.062038	-0.0200849
		Sig. (2-tailed)	0.00300897	0.00318345	0.00810112	0.0273847	0.124888	0.0197087	0.311863	0.0748975	0.000576518	0.498704	0.494822	0.527157	0.557943	0.525506	0.229933	0.221263	0.624403	0.282787	0.46605		0.00511945	0.0396959	0.00196452	0.0159509	0.00478294	0.396077	0.0661563	0.00967402	0.0123128	0.454149	0.496981	0.0822559	0.0666697	0.356944	0.053317	0.0345454	0.00464675	0.431113	0.481853	0.43435	0.947094	0.026223	0.644067	0.723631	0.0398714	0.570412	0.867008
		N	120	120	120	116	81	82	80	80	98	118	104	119	115	70	120	120	120	112	93	120	120	114	98	81	112	118	119	119	85	103	82	86	96	118	119	117	111	113	117	119	117	111	81	83	89	86	72
	15-19 years old heavy episodic drinkers (population), % by country	Correlation Coefficient	-,629**	-,624**	-,611**	-,556**	-,556**	,234**	-,525**	-,476**	-,322**	0.138118	,171*	-,178*	-,256**	-,194*	,296**	,268**	,278**	,188*	0.124975	-,254**	1	-,420**	,506**	,504**	-,609**	,275**	,528**	,557**	,504**	-,450**	,309**	,549**	,490**	,538**	-0.0922408	,608**	,612**	,174*	-,159*	,218**	,161*	,346**	,282**	,176*	,339**	,305**	-0.00478234
		Sig. (2-tailed)	3.16354e-22	9.16435e-22	1.07351e-20	3.98541e-16	3.05494e-13	0.00469654	1.24811e-11	1.42179e-09	2.77461e-05	0.0659804	0.0266467	0.0145905	0.000461619	0.0292994	3.52603e-05	0.000190244	0.000106186	0.0115492	0.116507	0.00511945		3.74048e-09	4.98055e-12	1.01596e-10	1.15213e-19	0.00014968	9.90924e-15	1.06164e-16	6.76419e-11	1.83985e-09	0.000306858	3.95151e-12	5.23497e-10	3.83755e-15	0.210502	5.90409e-20	1.4981e-19	0.0221959	0.0323909	0.00285784	0.0285185	2.78574e-06	0.00110322	0.0439589	5.78126e-05	0.000151926	0.961383
		N	189	189	189	182	146	144	145	145	163	178	169	188	184	126	189	189	189	180	159	120	189	182	164	145	180	185	186	188	148	162	132	137	143	183	186	184	177	173	182	186	184	175	131	131	135	149	105
	Adolescent fertility rate (per 1000 girls aged 15-19 years)	Correlation Coefficient	,791**	,781**	,763**	,595**	,481**	-,329**	,239**	,534**	,276**	-0.0484356	0.097276	,323**	0.0328812	,563**	-,522**	-,438**	-,513**	-,443**	-,274**	,193*	-,420**	1	-,685**	-,542**	,819**	-,459**	-,756**	-,670**	-,762**	,635**	-,560**	-,652**	-,498**	-,472**	,149*	-,711**	-,658**	-,218**	,340**	-,391**	-,315**	-,412**	-,230**	-,174*	-,394**	-,184*	0.0582555
		Sig. (2-tailed)	1.10054e-40	4.60335e-39	2.6879e-36	2.06255e-18	7.7339e-10	5.76729e-05	0.00381284	4.39772e-12	0.000354146	0.524434	0.205612	7.59646e-06	0.658576	4.65277e-12	2.83884e-14	5.20345e-10	9.35764e-14	8.27733e-10	0.000524856	0.0396959	3.74048e-09		1.82602e-23	2.20787e-12	5.39919e-45	8.3889e-11	9.66959e-35	3.27888e-25	1.38866e-29	3.00402e-19	4.18943e-12	1.52854e-17	2.50196e-10	2.51122e-11	0.0453475	5.55663e-29	3.50147e-23	0.00423324	3.49242e-06	4.96471e-08	1.70779e-05	1.62625e-08	0.00867879	0.049071	2.2357e-06	0.0239623	0.556928
		N	184	184	184	178	146	144	145	145	163	175	171	184	183	128	184	184	184	175	156	114	182	184	160	144	181	181	181	183	149	158	130	134	143	179	182	180	176	171	178	182	180	174	129	128	135	150	104
	Percentage of births attended by skilled health personnel (doctor, nurse or midwife)	Correlation Coefficient	-,829**	-,823**	-,808**	-,651**	-,762**	,527**	-,497**	-,782**	-,297**	,286**	-0.113066	-,317**	-0.0173481	-,343**	,596**	,607**	,564**	,561**	,450**	-,309**	,506**	-,685**	1	,788**	-,847**	,417**	,803**	,717**	,837**	-,644**	,599**	,739**	,484**	,520**	-0.0976486	,799**	,709**	0.0794919	-,199*	,298**	,443**	,677**	,274**	,265**	,689**	,354**	0.18871
		Sig. (2-tailed)	8.55775e-44	1.39593e-42	5.09679e-40	9.50283e-21	3.71538e-28	2.34805e-11	3.55344e-10	2.21659e-30	0.000219876	0.000303075	0.17124	3.13053e-05	0.826563	0.000127077	1.56326e-17	2.86452e-18	1.63979e-15	4.04648e-15	3.7061e-09	0.00196452	4.98055e-12	1.82602e-23		1.10713e-31	2.84603e-45	3.11318e-08	1.18182e-38	1.17509e-27	5.66796e-39	1.07689e-18	6.76522e-14	1.15018e-23	1.56964e-08	9.36463e-13	0.209325	8.19884e-38	3.0791e-25	0.330308	0.0109493	9.1295e-05	2.49641e-09	4.10716e-22	0.00173764	0.00296642	2.37698e-17	1.25964e-05	0.0855915
		N	168	168	168	161	142	140	141	141	150	155	148	166	162	120	168	168	168	166	156	98	164	160	168	144	160	163	166	167	144	148	129	130	122	164	167	165	157	152	163	167	165	155	128	124	114	145	84
	Percentage of women aged 15–49 years attended at least 4 times during pregnancy by skilled health personnel (doctor, nurse or midwife)	Correlation Coefficient	-,772**	-,773**	-,770**	-,573**	-,707**	,361**	-,586**	-,763**	-,179*	,226**	-0.0728105	-,322**	-0.117241	-,280**	,556**	,570**	,525**	,475**	,462**	-,267*	,504**	-,542**	,788**	1	-,741**	,356**	,685**	,661**	,718**	-,552**	,666**	,698**	,358**	,518**	-0.119795	,746**	,695**	0.0999972	-0.135516	,327**	,436**	,613**	,298**	,379**	,635**	,355**	,277*
		Sig. (2-tailed)	1.08072e-30	7.76192e-31	1.81171e-30	4.91306e-14	5.16844e-22	1.71627e-05	6.49585e-14	3.25336e-27	0.0360786	0.00807767	0.401341	6.59066e-05	0.160201	0.00241779	1.73685e-13	3.44875e-14	6.3777e-12	9.44028e-10	1.54059e-08	0.0159509	1.01596e-10	2.20787e-12	1.10713e-31		2.76107e-26	1.0382e-05	1.10349e-21	6.65478e-20	1.40069e-21	4.69322e-12	3.43938e-16	1.05177e-18	0.000121223	2.55094e-11	0.146991	3.4544e-27	1.56539e-21	0.248519	0.105339	4.9389e-05	3.90393e-08	1.0522e-15	0.00115782	2.90419e-05	5.69257e-13	3.68695e-05	0.0186978
		N	149	149	149	145	137	135	136	136	137	136	135	148	145	115	149	149	149	149	136	81	145	144	144	149	144	146	147	148	128	134	116	119	110	145	148	146	140	135	144	148	146	139	116	115	103	129	72
	Maternal mortality ratio (MMR, maternal deaths per 100 000 live births)	Correlation Coefficient	,937**	,932**	,920**	,661**	,736**	-,480**	,475**	,760**	,394**	-,173*	0.102698	,449**	0.0761399	,602**	-,558**	-,528**	-,550**	-,469**	-,359**	,265**	-,609**	,819**	-,847**	-,741**	1	-,489**	-,893**	-,807**	-,842**	,716**	-,630**	-,779**	-,617**	-,589**	0.130579	-,859**	-,845**	-,195*	,305**	-,390**	-,358**	-,580**	-,263**	-,302**	-,557**	-,267**	0.00215067
		Sig. (2-tailed)	7.40237e-85	1.56562e-81	2.37994e-75	1.03148e-23	5.52918e-26	1.25394e-09	1.83628e-09	2.45384e-28	1.79328e-07	0.0228545	0.181342	1.95897e-10	0.306975	5.35618e-14	2.43835e-16	1.56367e-14	7.8368e-16	6.74732e-11	4.09261e-06	0.00478294	1.15213e-19	5.39919e-45	2.84603e-45	2.76107e-26		3.19953e-12	1.21972e-63	4.41798e-43	2.87623e-41	2.63334e-26	1.02083e-15	1.62104e-28	3.57438e-16	5.63089e-18	0.0797564	2.62355e-53	1.23679e-48	0.0108129	3.63204e-05	5.89442e-08	8.94373e-07	7.10812e-17	0.00262056	0.000535793	3.28508e-12	0.00095352	0.982713
		N	183	183	183	178	145	143	144	144	164	173	171	182	182	128	183	183	183	174	156	112	180	181	160	144	183	180	180	182	149	159	130	134	141	178	181	179	174	170	177	181	179	172	129	128	133	150	104
	Health expenditure, public (% of total health expenditure)	Correlation Coefficient	-,467**	-,467**	-,475**	-,387**	-,361**	,177*	-,301**	-,381**	-0.13903	0.0344273	0.00134226	-,428**	-,266**	-0.0803236	,307**	,230**	,289**	,246**	,244**	-0.078842	,275**	-,459**	,417**	,356**	-,489**	1	,426**	,441**	,362**	-,195*	,344**	,358**	,240**	,433**	-0.0230175	,431**	,302**	,362**	-0.0843268	,197**	,341**	,362**	0.145999	,238**	,415**	,263**	-0.0384579
		Sig. (2-tailed)	1.08403e-11	1.06247e-11	4.43891e-12	5.49537e-08	7.47658e-06	0.034099	0.000234357	2.31746e-06	0.0758207	0.65011	0.98614	9.15847e-10	0.000268348	0.369344	1.64783e-05	0.00137696	5.4115e-05	0.000834808	0.00193075	0.396077	0.00014968	8.3889e-11	3.11318e-08	1.0382e-05	3.19953e-12		1.15937e-09	2.34251e-10	5.54632e-06	0.012562	4.65135e-05	1.47768e-05	0.00389629	8.69379e-10	0.755161	1.0333e-09	4.19588e-05	7.65337e-07	0.256393	0.00707963	2.17465e-06	7.84892e-07	0.0935717	0.00575426	5.67036e-07	0.00114533	0.69411
		N	190	190	190	185	146	144	145	145	164	176	170	188	184	127	190	190	190	181	159	118	185	181	163	146	180	190	187	188	149	164	134	139	143	184	186	184	178	177	183	186	184	176	133	133	135	150	107
	Improved sanitation facilities (% of population with access)	Correlation Coefficient	-,862**	-,853**	-,841**	-,589**	-,709**	,424**	-,412**	-,764**	-,454**	0.124709	-0.127632	-,555**	-0.0561401	-,560**	,587**	,539**	,574**	,506**	,367**	-0.169001	,528**	-,756**	,803**	,685**	-,893**	,426**	1	,777**	,824**	-,635**	,583**	,724**	,508**	,528**	-0.128984	,803**	,742**	,161*	-,224**	,293**	,363**	,590**	,228**	,281**	,521**	,315**	0.0659693
		Sig. (2-tailed)	1.00467e-57	3.41479e-55	2.08508e-52	1.84285e-18	1.23667e-23	1.16423e-07	2.59927e-07	5.84047e-29	7.72638e-10	0.099127	0.0992101	1.17319e-16	0.449093	7.81178e-12	4.13657e-19	9.23469e-16	4.24491e-18	3.06245e-13	1.55381e-06	0.0661563	9.90924e-15	9.66959e-35	1.18182e-38	1.10349e-21	1.21972e-63	1.15937e-09		8.02987e-40	2.01448e-38	6.57699e-20	1.51393e-13	7.68743e-24	9.20835e-11	1.08879e-14	0.0785153	6.32372e-43	1.96751e-32	0.0327516	0.00220275	4.66872e-05	3.84559e-07	7.18292e-18	0.00830265	0.00103228	8.94119e-11	8.39131e-05	0.501663
		N	191	191	191	183	146	144	145	145	166	176	168	189	184	127	191	191	191	182	162	119	186	181	166	147	180	187	191	191	150	164	134	139	143	185	187	185	178	176	184	187	185	176	133	133	135	151	106
	Population using improved drinking-water sources (%)	Correlation Coefficient	-,849**	-,845**	-,831**	-,532**	-,645**	,346**	-,430**	-,710**	-,350**	0.115378	-0.0861371	-,458**	-0.11635	-,391**	,500**	,472**	,494**	,419**	,309**	-,236**	,557**	-,670**	,717**	,661**	-,807**	,441**	,777**	1	,642**	-,529**	,542**	,618**	,490**	,563**	-0.115729	,749**	,702**	,212**	-,183*	,362**	,398**	,586**	,389**	,288**	,551**	,281**	0.121641
		Sig. (2-tailed)	1.0937e-54	7.43453e-54	1.78705e-50	8.13569e-15	1.23429e-18	2.02217e-05	6.28654e-08	1.16096e-23	3.58007e-06	0.125124	0.264045	2.69933e-11	0.113769	4.93793e-06	1.25173e-13	3.98919e-12	2.9149e-13	3.18675e-09	6.06144e-05	0.00967402	1.06164e-16	3.27888e-25	1.17509e-27	6.65478e-20	4.41798e-43	2.34251e-10	8.02987e-40		7.90943e-19	3.21415e-13	1.39984e-11	4.98498e-16	4.43571e-10	6.2667e-17	0.112786	6.64951e-35	6.93283e-28	0.00465797	0.0124753	3.02106e-07	1.70232e-08	1.0771e-17	3.67062e-06	0.000761497	3.72215e-12	0.00046346	0.211986
		N	193	193	193	184	147	145	146	146	167	178	170	191	186	128	193	193	193	184	163	119	188	183	167	148	182	188	191	193	150	164	134	139	144	186	189	187	179	177	185	189	187	177	133	133	136	151	107
	Youth literacy rate, population 15-24 years, both sexes (%)	Correlation Coefficient	-,809**	-,798**	-,790**	-,676**	-,699**	,487**	-,478**	-,710**	-,261**	,316**	-0.0736425	-,229**	-0.0182205	-,444**	,546**	,547**	,543**	,521**	,420**	-,270*	,504**	-,762**	,837**	,718**	-,842**	,362**	,824**	,642**	1	-,744**	,646**	,758**	,562**	,498**	-0.157462	,825**	,719**	0.131093	-,243**	,339**	,418**	,598**	,307**	,384**	,610**	,323**	0.156705
		Sig. (2-tailed)	3.41926e-36	1.41212e-34	2.10755e-33	8.14956e-21	7.92008e-21	4.18218e-09	5.77839e-09	1.07323e-21	0.00195272	0.000144306	0.382067	0.00487831	0.825439	5.43799e-07	4.05505e-13	3.48859e-13	5.84592e-13	9.44882e-12	2.09864e-07	0.0123128	6.76419e-11	1.38866e-29	5.66796e-39	1.40069e-21	2.87623e-41	5.54632e-06	2.01448e-38	7.90943e-19		6.40464e-26	4.89078e-15	6.15904e-23	4.28369e-11	1.33807e-10	0.0551277	1.00577e-37	7.29484e-25	0.123988	0.0030214	2.36383e-05	1.33085e-07	1.3323e-15	0.000837647	3.16814e-05	1.48243e-12	5.2929e-05	0.159742
		N	151	151	151	146	133	130	133	133	139	140	143	150	149	117	151	151	151	149	141	85	148	149	144	128	149	149	150	150	151	140	116	116	117	147	149	147	148	139	147	149	147	147	115	111	110	151	82
	Repetition rate in primary education (all grades), both sexes (%)	Correlation Coefficient	,642**	,632**	,609**	,575**	,555**	-,300**	,348**	,597**	,225**	-,167*	0.0366472	0.046894	-0.018269	,517**	-,450**	-,440**	-,432**	-,417**	-,354**	0.0745606	-,450**	,635**	-,644**	-,552**	,716**	-,195*	-,635**	-,529**	-,744**	1	-,509**	-,700**	-,513**	-,380**	,336**	-,628**	-,644**	-0.0413143	,268**	-,414**	-,229**	-,430**	-0.137146	-0.0855166	-,455**	-0.100341	0.0468081
		Sig. (2-tailed)	1.64209e-20	8.30709e-20	3.72754e-18	9.3608e-16	5.74983e-12	0.000561267	4.53037e-05	5.40052e-14	0.00659555	0.0389133	0.656154	0.55223	0.818641	2.84616e-09	1.33222e-09	3.35752e-09	6.58782e-09	4.05162e-08	1.38039e-05	0.454149	1.83985e-09	3.00402e-19	1.07689e-18	4.69322e-12	2.63334e-26	0.012562	6.57699e-20	3.21415e-13	6.40464e-26		1.63467e-09	1.95683e-20	5.06462e-10	7.0812e-07	1.22529e-05	5.86698e-19	8.61985e-20	0.608592	0.000604834	4.21244e-08	0.00352353	2.13028e-08	0.128786	0.341046	1.40563e-07	0.236466	0.655929
		N	165	165	165	163	131	129	131	131	144	153	150	163	160	116	165	165	165	160	144	103	162	158	148	134	159	164	164	164	140	165	124	130	129	160	162	160	157	156	160	162	160	156	124	126	122	141	93
	Gross graduation ratio from primary education, both sexes (%)	Correlation Coefficient	-,615**	-,606**	-,602**	-,459**	-,501**	,383**	-,331**	-,535**	-0.0267703	0.159091	-0.171539	-,266**	-,229**	-,472**	,524**	,523**	,504**	,494**	,442**	-0.0760694	,309**	-,560**	,599**	,666**	-,630**	,344**	,583**	,542**	,646**	-,509**	1	,716**	,234*	,479**	0.152512	,729**	,584**	0.0871063	-0.0540598	,308**	,420**	,556**	,275**	,308**	,546**	,332**	0.166826
		Sig. (2-tailed)	2.1598e-15	6.59027e-15	1.18815e-14	3.21254e-08	9.80498e-09	2.64843e-05	0.000278657	5.93391e-10	0.769754	0.0751836	0.0578117	0.00195297	0.00820025	4.36666e-07	7.06701e-11	7.66755e-11	4.76009e-10	1.71072e-09	3.35182e-07	0.496981	0.000306858	4.18943e-12	6.76522e-14	3.43938e-16	1.02083e-15	4.65135e-05	1.51393e-13	1.39984e-11	4.89078e-15	1.63467e-09		2.47635e-20	0.0173666	5.39799e-09	0.0774132	2.49605e-23	2.56611e-13	0.328229	0.536565	0.000283831	4.7767e-07	6.67974e-12	0.00149353	0.000763974	8.73926e-09	0.000273086	0.152564
		N	135	135	135	132	116	114	116	116	122	126	123	133	132	104	135	135	135	132	122	82	132	130	129	116	130	134	134	134	116	124	135	121	103	133	135	133	131	128	133	135	133	130	131	116	96	116	75
	Gross graduation ratio from lower secondary education, both sexes (%)	Correlation Coefficient	-,737**	-,735**	-,719**	-,636**	-,600**	,421**	-,417**	-,653**	-0.131386	0.149052	0.0349909	-,176*	-0.112496	-,447**	,565**	,575**	,562**	,516**	,403**	-0.18846	,549**	-,652**	,739**	,698**	-,779**	,358**	,724**	,618**	,758**	-,700**	,716**	1	,490**	,546**	-0.0697339	,796**	,675**	-0.00573857	-0.147033	,394**	,250**	,489**	0.156706	0.138222	,481**	,220*	0.0529801
		Sig. (2-tailed)	2.92768e-25	4.62983e-25	1.45377e-23	6.67196e-17	1.08887e-12	2.78009e-06	3.20029e-06	2.05752e-15	0.144148	0.0892951	0.698461	0.039122	0.192249	2.83655e-06	3.66606e-13	1.04238e-13	5.09645e-13	1.55846e-10	2.90641e-06	0.0822559	3.95151e-12	1.52854e-17	1.15018e-23	1.05177e-18	1.62104e-28	1.47768e-05	7.68743e-24	4.98498e-16	6.15904e-23	1.95683e-20	2.47635e-20		4.69428e-08	4.4282e-12	0.412956	2.01697e-31	1.90585e-19	0.947731	0.0852679	1.4552e-06	0.00310425	1.81056e-09	0.0860707	0.111229	2.30686e-07	0.0178052	0.640687
		N	140	140	140	137	116	115	116	116	125	131	125	138	136	101	140	140	140	135	126	86	137	134	130	119	134	139	139	139	116	130	121	140	111	138	140	138	136	133	138	140	138	135	121	134	104	116	80
	Gross graduation ratio from first degree programmes (ISCED 6 and 7) in tertiary education, both sexes (%)	Correlation Coefficient	-,591**	-,593**	-,586**	-,570**	-,539**	,284**	-,373**	-,450**	-,256**	0.138479	0.104268	-,193*	-,180*	-,367**	,195*	,220**	,216**	0.13318	0.0745899	-0.187961	,490**	-,498**	,484**	,358**	-,617**	,240**	,508**	,490**	,562**	-,513**	,234*	,490**	1	,485**	-0.126098	,592**	,667**	,246**	-,190*	,267**	0.140738	,273**	0.136401	0.151866	,321**	0.048656	-0.074096
		Sig. (2-tailed)	5.2577e-15	3.98886e-15	9.748e-15	1.27809e-13	1.47202e-09	0.00290465	6.45096e-05	8.96934e-07	0.00370549	0.105281	0.2253	0.0207752	0.0322224	0.000175253	0.0187926	0.00785525	0.0090864	0.12218	0.420119	0.0666697	5.23497e-10	2.50196e-10	1.56964e-08	0.000121223	3.57438e-16	0.00389629	9.20835e-11	4.43571e-10	4.28369e-11	5.06462e-10	0.0173666	4.69428e-08		8.60108e-10	0.130707	6.60835e-15	4.87147e-20	0.00339566	0.0232933	0.00117305	0.0936265	0.000875892	0.173794	0.120173	0.000137112	0.602399	0.487641
		N	145	145	145	142	109	108	109	109	127	138	137	144	142	100	145	145	145	136	119	96	143	143	122	110	141	143	143	144	117	129	103	111	145	143	145	143	145	140	143	145	143	145	101	106	136	117	90
	Gross enrolment ratio, pre-primary, both sexes (%)	Correlation Coefficient	-,648**	-,650**	-,626**	-,430**	-,470**	0.143203	-,413**	-,509**	-,182*	0.0248104	0.0730773	-,428**	-,222**	-,279**	,377**	,376**	,360**	,306**	,237**	-0.0855589	,538**	-,472**	,520**	,518**	-,589**	,433**	,528**	,563**	,498**	-,380**	,479**	,546**	,485**	1	-0.04357	,594**	,568**	,253**	-0.129379	,191**	,259**	,502**	,224**	,309**	,439**	,331**	0.154275
		Sig. (2-tailed)	9.00237e-24	5.92779e-24	6.87014e-22	1.54262e-09	3.25222e-09	0.0902573	3.36316e-07	9.77261e-11	0.0199102	0.744493	0.349442	1.17448e-09	0.00267756	0.0017026	9.28177e-08	1.06834e-07	3.9691e-07	3.12647e-05	0.00268305	0.356944	3.83755e-15	2.51122e-11	9.36463e-13	2.55094e-11	5.63089e-18	8.69379e-10	1.08879e-14	6.2667e-17	1.33807e-10	7.0812e-07	5.39799e-09	4.4282e-12	8.60108e-10		0.552713	3.00081e-19	1.06278e-16	0.000763774	0.0775983	0.0086429	0.000336907	1.03288e-12	0.00978884	0.00031004	9.14647e-08	3.94405e-05	0.117895
		N	188	188	188	181	143	141	142	142	163	175	166	185	181	124	188	188	188	179	158	118	183	179	164	145	178	184	185	186	147	160	133	138	143	188	188	187	179	174	187	188	187	177	132	132	136	148	104
	Gross enrolment ratio, primary, both sexes (%)	Correlation Coefficient	0.14127	0.136252	0.123413	0.0429721	0.0683963	0.00910778	-0.0791403	0.124591	,304**	-0.0379834	0.0134324	-0.0656824	-0.119154	0.0431848	-0.00185168	0.0159667	0.0405732	0.00473038	0.0114173	0.177601	-0.0922408	,149*	-0.0976486	-0.119795	0.130579	-0.0230175	-0.128984	-0.115729	-0.157462	,336**	0.152512	-0.0697339	-0.126098	-0.04357	1	-0.0104197	-0.138318	0.0396126	,271**	0.0523363	,176*	-0.0377126	0.162259	0.139022	-0.0838109	,165*	-0.00345239
		Sig. (2-tailed)	0.0512522	0.0601832	0.0889602	0.563534	0.412049	0.913724	0.34404	0.135407	6.97982e-05	0.614702	0.86239	0.370491	0.107176	0.629748	0.979718	0.826471	0.577335	0.949466	0.885702	0.053317	0.210502	0.0453475	0.209325	0.146991	0.0797564	0.755161	0.0785153	0.112786	0.0551277	1.22529e-05	0.0774132	0.412956	0.130707	0.552713		0.886843	0.0633226	0.601684	0.00017286	0.472112	0.0151279	0.616227	0.0610521	0.109154	0.330202	0.0434718	0.972117
		N	191	191	191	183	146	144	145	145	166	178	169	188	184	127	191	191	191	182	161	119	186	182	167	148	181	186	187	189	149	162	135	140	145	188	191	189	181	176	187	191	189	179	134	134	137	150	105
	Gross enrolment ratio, secondary, both sexes (%)	Correlation Coefficient	-,830**	-,826**	-,814**	-,651**	-,709**	,462**	-,486**	-,741**	-,346**	,160*	-0.0261075	-,444**	-,181*	-,495**	,559**	,570**	,544**	,482**	,346**	-,196*	,608**	-,711**	,799**	,746**	-,859**	,431**	,803**	,749**	,825**	-,628**	,729**	,796**	,592**	,594**	-0.0104197	1	,844**	,265**	-,210**	,355**	,366**	,578**	,276**	,294**	,560**	,297**	0.0642683
		Sig. (2-tailed)	2.339e-49	2.00161e-48	4.592e-46	3.14033e-23	2.7944e-23	6.96726e-09	7.74189e-10	4.11121e-26	5.76909e-06	0.0341883	0.737696	2.25488e-10	0.0146546	4.37683e-09	5.83689e-17	1.18721e-17	5.9984e-16	7.68756e-12	7.81836e-06	0.0345454	5.90409e-20	5.55663e-29	8.19884e-38	3.4544e-27	2.62355e-53	1.0333e-09	6.32372e-43	6.64951e-35	1.00577e-37	5.86698e-19	2.49605e-23	2.01697e-31	6.60835e-15	3.00081e-19	0.886843		8.37569e-50	0.000419088	0.00400332	5.30456e-07	2.16838e-07	3.75081e-17	0.00136109	0.000610863	1.42237e-12	0.000249883	0.514824
		N	189	189	189	181	144	142	143	143	164	176	167	186	182	125	189	189	189	180	159	117	184	180	165	146	179	184	185	187	147	160	133	138	143	187	189	189	179	174	186	189	189	177	132	132	136	148	105
	Gross enrolment ratio, tertiary, both sexes (%)	Correlation Coefficient	-,832**	-,829**	-,803**	-,605**	-,704**	,410**	-,494**	-,703**	-,396**	,225**	-0.0247147	-,340**	-,162*	-,540**	,413**	,423**	,418**	,338**	,245**	-,267**	,612**	-,658**	,709**	,695**	-,845**	,302**	,742**	,702**	,719**	-,644**	,584**	,675**	,667**	,568**	-0.138318	,844**	1	,244**	-,307**	,266**	,279**	,540**	,286**	,304**	,496**	,196*	0.131779
		Sig. (2-tailed)	9.56933e-48	4.41176e-47	4.07989e-42	5.80502e-19	3.04548e-22	5.90137e-07	5.57433e-10	3.39779e-22	2.13925e-07	0.00313848	0.752685	3.32277e-06	0.0316665	7.90045e-11	7.33321e-09	3.09068e-09	4.56642e-09	5.92991e-06	0.00237137	0.00464675	1.4981e-19	3.50147e-23	3.0791e-25	1.56539e-21	1.23679e-48	4.19588e-05	1.96751e-32	6.93283e-28	7.29484e-25	8.61985e-20	2.56611e-13	1.90585e-19	4.87147e-20	1.06278e-16	0.0633226	8.37569e-50		0.00134772	2.84625e-05	0.000302576	0.000156364	5.79836e-15	0.000991534	0.000444442	6.96443e-10	0.016766	0.182378
		N	181	181	181	176	140	138	140	140	160	170	165	178	176	125	181	181	181	172	152	111	177	176	157	140	174	178	178	179	148	157	131	136	145	179	181	179	181	170	179	181	179	179	130	130	137	148	104
	Government expenditure on education as % of GDP (%)	Correlation Coefficient	-,168*	-,162*	-,165*	-,194*	-,245**	0.126909	-,258**	-,171*	-0.111357	-,199*	-0.022686	-,319**	-,245**	0.0185129	0.086216	0.0601918	0.111573	0.054822	-0.00338614	-0.0747896	,174*	-,218**	0.0794919	0.0999972	-,195*	,362**	,161*	,212**	0.131093	-0.0413143	0.0871063	-0.00573857	,246**	,253**	0.0396126	,265**	,244**	1	0.0549133	0.121803	,248**	,159*	,288**	0.0833306	0.158773	,255**	0.0365003
		Sig. (2-tailed)	0.0242355	0.0300933	0.0270831	0.0106602	0.00434161	0.147037	0.00273166	0.0487526	0.171995	0.0101007	0.776534	1.60696e-05	0.0011316	0.840939	0.251155	0.423481	0.137033	0.477672	0.967308	0.431113	0.0221959	0.00423324	0.330308	0.248519	0.0108129	7.65337e-07	0.0327516	0.00465797	0.123988	0.608592	0.328229	0.947731	0.00339566	0.000763774	0.601684	0.000419088	0.00134772		0.473018	0.107314	0.000967659	0.0392669	0.00109166	0.351634	0.0700891	0.0023248	0.712981
		N	179	179	179	172	134	132	133	133	152	166	159	176	173	120	179	179	179	170	149	113	173	171	152	135	170	177	176	177	139	156	128	133	140	174	176	174	170	179	173	176	174	168	126	127	131	140	104
	Gross enrolment ratio, pri-primary, gender parity index (GPI)	Correlation Coefficient	,252**	,246**	,230**	,253**	,190*	-,214*	0.0640344	0.155199	0.129237	-0.11371	-0.0507978	-0.0548549	-0.014656	0.115914	-0.071452	-0.0481463	-0.0537145	-0.0352801	0.0369021	0.0656571	-,159*	,340**	-,199*	-0.135516	,305**	-0.0843268	-,224**	-,183*	-,243**	,268**	-0.0540598	-0.147033	-,190*	-0.129379	,271**	-,210**	-,307**	0.0549133	1	0.0188597	,156*	-0.0449698	0.149484	0.0481079	-0.0311913	0.081463	-,197*
		Sig. (2-tailed)	0.000496496	0.0006849	0.00153346	0.000599623	0.0235306	0.0110946	0.448995	0.0651458	0.101201	0.135181	0.515719	0.459559	0.84518	0.199838	0.331159	0.512883	0.465307	0.640124	0.646347	0.481853	0.0323909	3.49242e-06	0.0109493	0.105339	3.63204e-05	0.256393	0.00220275	0.0124753	0.0030214	0.000604834	0.536565	0.0852679	0.0232933	0.0775983	0.00017286	0.00400332	2.84625e-05	0.473018		0.797799	0.0339917	0.552281	0.0871314	0.583844	0.718488	0.324981	0.0445515
		N	187	187	187	180	142	140	142	142	162	174	166	184	180	124	187	187	187	178	157	117	182	178	163	144	177	183	184	185	147	160	133	138	143	187	187	186	179	173	187	187	186	177	132	132	136	148	104
	Gross enrolment ratio, primary, gender parity index (GPI)	Correlation Coefficient	-,392**	-,393**	-,384**	-,279**	-,272**	0.0795022	-,234**	-,305**	0.0768865	0.0222333	0.0766013	-0.138258	-0.0996117	-,252**	,303**	,277**	,279**	,269**	,217**	-0.0723343	,218**	-,391**	,298**	,327**	-,390**	,197**	,293**	,362**	,339**	-,414**	,308**	,394**	,267**	,191**	0.0523363	,355**	,266**	0.121803	0.0188597	1	,299**	,164*	,473**	,239**	0.161161	,169*	-0.106024
		Sig. (2-tailed)	1.97538e-08	1.8478e-08	4.25369e-08	0.000133914	0.000880137	0.343531	0.0045519	0.000195694	0.324827	0.768318	0.322232	0.0584711	0.178516	0.00427522	2.08018e-05	0.000103935	9.05202e-05	0.000235203	0.00571396	0.43435	0.00285784	4.96471e-08	9.1295e-05	4.9389e-05	5.89442e-08	0.00707963	4.66872e-05	3.02106e-07	2.36383e-05	4.21244e-08	0.000283831	1.4552e-06	0.00117305	0.0086429	0.472112	5.30456e-07	0.000302576	0.107314	0.797799		2.85645e-05	0.0277977	8.06092e-09	0.00541675	0.0599214	0.0385651	0.281726
		N	191	191	191	183	146	144	145	145	166	178	169	188	184	127	191	191	191	182	161	119	186	182	167	148	181	186	187	189	149	162	135	140	145	188	191	189	181	176	187	191	189	179	134	134	137	150	105
	Gross enrolment ratio, secondary, gender parity index (GPI)	Correlation Coefficient	-,375**	-,371**	-,369**	-,254**	-,394**	,286**	-,329**	-,428**	0.00727235	0.0685323	-0.150537	-,418**	-,278**	-,241**	,313**	,310**	,307**	,295**	,385**	-0.00620114	,161*	-,315**	,443**	,436**	-,358**	,341**	,363**	,398**	,418**	-,229**	,420**	,250**	0.140738	,259**	,176*	,366**	,279**	,248**	,156*	,299**	1	,620**	,646**	,672**	,493**	,557**	0.143943
		Sig. (2-tailed)	1.02363e-07	1.44108e-07	1.75561e-07	0.000554236	1.02428e-06	0.000568121	6.09673e-05	1.00369e-07	0.926364	0.366118	0.0521573	2.79897e-09	0.000144376	0.00674276	1.12999e-05	1.46585e-05	1.77852e-05	5.83858e-05	5.34124e-07	0.947094	0.0285185	1.70779e-05	2.49641e-09	3.90393e-08	8.94373e-07	2.17465e-06	3.84559e-07	1.70232e-08	1.33085e-07	0.00352353	4.7767e-07	0.00310425	0.0936265	0.000336907	0.0151279	2.16838e-07	0.000156364	0.000967659	0.0339917	2.85645e-05		3.34615e-20	6.00106e-17	1.22547e-18	1.0602e-09	1.90629e-13	0.142932
		N	189	189	189	181	144	142	143	143	164	176	167	186	182	125	189	189	189	180	159	117	184	180	165	146	179	184	185	187	147	160	133	138	143	187	189	189	179	174	186	189	189	177	132	132	136	148	105
	Gross enrolment ratio, tertiary, gender parity index (GPI)	Correlation Coefficient	-,630**	-,627**	-,622**	-,418**	-,569**	,428**	-,376**	-,639**	-,291**	,175*	-0.13598	-,457**	-,151*	-,247**	,406**	,430**	,371**	,391**	,411**	-,211*	,346**	-,412**	,677**	,613**	-,580**	,362**	,590**	,586**	,598**	-,430**	,556**	,489**	,273**	,502**	-0.0377126	,578**	,540**	,159*	-0.0449698	,164*	,620**	1	,329**	,446**	,883**	,417**	,271**
		Sig. (2-tailed)	3.45004e-21	5.59239e-21	1.43206e-20	9.11568e-09	2.69146e-13	1.80559e-07	5.01735e-06	2.63957e-17	0.000208935	0.0235864	0.0825382	1.74148e-10	0.0465662	0.00573134	1.65425e-08	1.85896e-09	3.17901e-07	1.31913e-07	1.69892e-07	0.026223	2.78574e-06	1.62625e-08	4.10716e-22	1.0522e-15	7.10812e-17	7.84892e-07	7.18292e-18	1.0771e-17	1.3323e-15	2.13028e-08	6.67974e-12	1.81056e-09	0.000875892	1.03288e-12	0.616227	3.75081e-17	5.79836e-15	0.0392669	0.552281	0.0277977	3.34615e-20		0.000138347	1.08438e-07	2.93581e-46	1.48679e-07	0.00546491
		N	179	179	179	174	139	137	139	139	158	168	164	176	174	124	179	179	179	170	150	111	175	174	155	139	172	176	176	177	147	156	130	135	145	177	179	177	179	168	177	179	177	179	129	130	137	147	104
	Gross graduation ratio from primary education, gender parity index (GPI)	Correlation Coefficient	-,323**	-,318**	-,338**	-,192*	-,318**	,204*	-,300**	-,283**	0.0671098	0.0602545	0.022979	-,203*	-,231**	-0.165421	,210*	,190*	,245**	,210*	,268**	0.0521106	,282**	-,230**	,274**	,298**	-,263**	0.145999	,228**	,389**	,307**	-0.137146	,275**	0.156706	0.136401	,224**	0.162259	,276**	,286**	,288**	0.149484	,473**	,646**	,329**	1	,427**	,212*	,531**	0.0114517
		Sig. (2-tailed)	0.000138216	0.000180064	6.66116e-05	0.0279842	0.000543053	0.0300188	0.00114405	0.00215255	0.464553	0.502715	0.802449	0.0195818	0.00793813	0.0949436	0.015114	0.0283075	0.00425	0.0163026	0.00300935	0.644067	0.00110322	0.00867879	0.00173764	0.00115782	0.00262056	0.0935717	0.00830265	3.67062e-06	0.000837647	0.128786	0.00149353	0.0860707	0.173794	0.00978884	0.0610521	0.00136109	0.000991534	0.00109166	0.0871314	8.06092e-09	6.00106e-17	0.000138347		1.27857e-06	0.0378863	9.98007e-10	0.922319
		N	134	134	134	131	115	113	115	115	121	126	121	132	131	103	134	134	134	131	121	81	131	129	128	116	129	133	133	133	115	124	131	121	101	132	134	132	130	126	132	134	132	129	134	119	96	115	75
	Gross graduation ratio from lower secondary education, gender parity index (GPI)	Correlation Coefficient	-,298**	-,294**	-,290**	-,180*	-,375**	,246**	-,279**	-,413**	-0.0134101	,185*	-0.108492	-,370**	-,213*	-,209*	,190*	,219*	,188*	,180*	,328**	0.0393962	,176*	-,174*	,265**	,379**	-,302**	,238**	,281**	,288**	,384**	-0.0855166	,308**	0.138222	0.151866	,309**	0.139022	,294**	,304**	0.0833306	0.0481079	,239**	,672**	,446**	,427**	1	,239*	,435**	0.127514
		Sig. (2-tailed)	0.000472086	0.000566398	0.000673595	0.04017	4.89364e-05	0.00968995	0.00303938	6.70522e-06	0.884909	0.0385449	0.238191	1.29835e-05	0.0148398	0.0395537	0.0278111	0.0109582	0.0294751	0.0410002	0.000249672	0.723631	0.0439589	0.049071	0.00296642	2.90419e-05	0.000535793	0.00575426	0.00103228	0.000761497	3.16814e-05	0.341046	0.000763974	0.111229	0.120173	0.00031004	0.109154	0.000610863	0.000444442	0.351634	0.583844	0.00541675	1.22547e-18	1.08438e-07	1.27857e-06		0.0161957	1.86006e-06	0.265905
		N	134	134	134	131	111	110	111	111	119	126	120	132	130	97	134	134	134	129	120	83	131	128	124	115	128	133	133	133	111	126	116	134	106	132	134	132	130	127	132	134	132	130	119	134	101	111	78
	Gross graduation ratio from first degree programmes (ISCED 6 and 7) in tertiary education, gender parity index (GPI)	Correlation Coefficient	-,554**	-,555**	-,557**	-,456**	-,532**	,374**	-,353**	-,589**	-,383**	,200*	-0.127409	-,370**	-0.0444464	-,303**	,420**	,426**	,353**	,364**	,338**	-,218*	,339**	-,394**	,689**	,635**	-,557**	,415**	,521**	,551**	,610**	-,455**	,546**	,481**	,321**	,439**	-0.0838109	,560**	,496**	0.158773	-0.0311913	0.161161	,493**	,883**	,212*	,239*	1	,246**	,219*
		Sig. (2-tailed)	2.2741e-12	1.93292e-12	1.5226e-12	2.98994e-08	1.01948e-08	0.000123928	0.000289914	8.92869e-11	1.75514e-05	0.0227923	0.148585	9.36256e-06	0.610096	0.00318257	3.16777e-07	2.048e-07	2.30755e-05	2.41819e-05	0.00028486	0.0398714	5.78126e-05	2.2357e-06	2.37698e-17	5.69257e-13	3.28508e-12	5.67036e-07	8.94119e-11	3.72215e-12	1.48243e-12	1.40563e-07	8.73926e-09	2.30686e-07	0.000137112	9.14647e-08	0.330202	1.42237e-12	6.96443e-10	0.0700891	0.718488	0.0599214	1.0602e-09	2.93581e-46	0.0378863	0.0161957		0.00973412	0.0414803
		N	137	137	137	134	101	100	101	101	119	130	130	136	134	93	137	137	137	128	111	89	135	135	114	103	133	135	135	136	110	122	96	104	136	136	137	136	137	131	136	137	136	137	96	101	137	110	87
	Youth literacy rate, population 15-24 years, gender parity index (GPI)	Correlation Coefficient	-,309**	-,305**	-,310**	-,247**	-,352**	,306**	-,348**	-,337**	-0.0341837	0.070708	0.0464469	-,297**	-,259**	0.0475166	,202*	,230**	,214**	,215**	,227**	0.062038	,305**	-,184*	,354**	,355**	-,267**	,263**	,315**	,281**	,323**	-0.100341	,332**	,220*	0.048656	,331**	,165*	,297**	,196*	,255**	0.081463	,169*	,557**	,417**	,531**	,435**	,246**	1	-0.022128
		Sig. (2-tailed)	0.000109777	0.000134434	0.000100684	0.00251299	3.09953e-05	0.000378627	3.77766e-05	6.91639e-05	0.688451	0.404743	0.580398	0.000211594	0.00137609	0.610935	0.0127609	0.00428972	0.00808815	0.00823976	0.00659552	0.570412	0.000151926	0.0239623	1.25964e-05	3.68695e-05	0.00095352	0.00114533	8.39131e-05	0.00046346	5.2929e-05	0.236466	0.000273086	0.0178052	0.602399	3.94405e-05	0.0434718	0.000249883	0.016766	0.0023248	0.324981	0.0385651	1.90629e-13	1.48679e-07	9.98007e-10	1.86006e-06	0.00973412		0.843573
		N	152	152	152	147	134	131	134	134	140	141	144	151	150	117	152	152	152	150	142	86	149	150	145	129	150	150	151	151	151	141	116	116	117	148	150	148	148	140	148	150	148	147	115	111	110	152	82
	Juveniles Held in Prisons, Penal Institutions or Correctional Institutions, rate per 100,000 juveniles aged 17 or under	Correlation Coefficient	-0.0224476	-0.0254352	0.00233199	0.0858087	-,277*	0.219823	-,254*	-,300*	0.00965662	0.136927	-0.0913739	-0.0911056	0.0359442	0.167338	0.117014	,200*	0.0599226	0.141935	,283**	-0.0200849	-0.00478234	0.0582555	0.18871	,277*	0.00215067	-0.0384579	0.0659693	0.121641	0.156705	0.0468081	0.166826	0.0529801	-0.074096	0.154275	-0.00345239	0.0642683	0.131779	0.0365003	-,197*	-0.106024	0.143943	,271**	0.0114517	0.127514	,219*	-0.022128	1
		Sig. (2-tailed)	0.817628	0.793864	0.98089	0.384104	0.0195708	0.0654773	0.0328084	0.0110356	0.927614	0.167832	0.361048	0.352992	0.715838	0.166168	0.227803	0.0382176	0.537867	0.161092	0.00952376	0.867008	0.961383	0.556928	0.0855915	0.0186978	0.982713	0.69411	0.501663	0.211986	0.159742	0.655929	0.152564	0.640687	0.487641	0.117895	0.972117	0.514824	0.182378	0.712981	0.0445515	0.281726	0.142932	0.00546491	0.922319	0.265905	0.0414803	0.843573
		N	108	108	108	105	71	71	71	71	91	103	102	106	105	70	108	108	108	99	83	72	105	104	84	72	104	107	106	107	82	93	75	80	90	104	105	105	104	104	104	105	105	104	75	78	87	82	108
	Juveniles Brought into Formal Contact with the police and/or criminal justice system, All Crimes, rate per 100,000 juveniles aged 17 or under	Correlation Coefficient	-,694**	-,698**	-,680**	-,505**	-,617**	,273*	-,452**	-,652**	-,340**	-0.0828931	0.0532464	-,362**	-,197*	-0.0797705	,262**	0.1168	,256**	0.182546	0.03965	-0.221913	,575**	-,536**	,529**	,501**	-,649**	,552**	,550**	,602**	,355**	-0.115384	0.186362	,331**	,442**	,583**	-0.177032	,547**	,672**	,330**	-0.15837	0.104915	0.0102167	,211*	0.119324	0.0406967	0.0185904	0.121786	-0.0246612
		Sig. (2-tailed)	8.85933e-17	4.42825e-17	5.78759e-16	3.42377e-08	1.30716e-08	0.0233264	8.59665e-05	1.00376e-09	0.000918232	0.402834	0.59322	0.00013857	0.0434715	0.517865	0.00625306	0.228658	0.00756518	0.0705341	0.725257	0.0524174	1.35098e-10	4.51781e-09	2.68891e-07	6.21749e-06	6.78697e-14	7.01471e-10	1.05891e-09	6.98591e-12	0.00124519	0.265511	0.111876	0.00306285	9.14753e-06	8.34963e-11	0.0708207	1.55572e-09	5.41522e-15	0.00062593	0.108341	0.286817	0.917614	0.0316525	0.314653	0.725276	0.862717	0.28186	0.815495
		N	108	108	108	106	70	69	70	70	92	104	103	106	105	68	108	108	108	99	81	77	105	104	83	73	105	107	106	107	80	95	74	78	93	104	105	105	104	104	104	105	105	104	73	77	89	80	92
	Intentional homicide, rates per 100,000 population	Correlation Coefficient	,552**	,549**	,550**	,347**	0.135016	-0.12767	-0.027247	,172*	0.151923	0.0502295	0.0679607	,162*	0.0820045	,502**	-,337**	-,199**	-,336**	-,258**	-0.116095	0.120133	-,270**	,630**	-,298**	-0.157603	,569**	-,322**	-,526**	-,475**	-,423**	,403**	-,265**	-,383**	-,343**	-,336**	0.0740158	-,403**	-,385**	-0.0221121	,147*	-,312**	-0.0406469	-0.139607	-0.0650028	0.0414292	-0.0960214	0.114443	,241*
		Sig. (2-tailed)	5.68418e-17	9.09558e-17	7.96256e-17	1.17853e-06	0.101816	0.124618	0.74322	0.0370281	0.0500043	0.503095	0.377125	0.0251652	0.264527	1.51054e-09	1.40315e-06	0.00536674	1.62836e-06	0.000376696	0.13877	0.191229	0.000174758	9.57108e-22	8.87102e-05	0.0549088	4.61332e-17	6.05113e-06	5.66688e-15	3.06738e-12	6.29332e-08	7.7328e-08	0.00191268	2.9189e-06	2.429e-05	2.51342e-06	0.308868	9.01336e-09	8.42522e-08	0.768909	0.0446743	1.14475e-05	0.578672	0.0623396	0.455545	0.634581	0.264343	0.160342	0.0121303
		N	195	195	195	186	148	146	147	147	167	180	171	192	187	128	195	195	195	186	164	120	189	184	168	149	183	190	191	193	151	165	135	140	145	188	191	189	181	179	187	191	189	179	134	134	137	152	108
	Assault at the national level, number of police-recorded offences	Correlation Coefficient	-,199*	-,200*	-,214*	-0.0189225	-,233*	-0.0318227	-,316**	-,258*	-0.065196	-0.164215	-0.0581072	-,437**	-,189*	0.115615	,201*	,255**	,253**	0.165778	0.102416	-0.0180979	0.117037	-0.0931214	0.0615598	,303**	-0.112248	,321**	0.163903	0.159464	-0.0555412	0.175279	,302**	0.171341	-0.0264879	,291**	0.0912667	,278**	,196*	,243**	-0.0154557	-0.0666691	,188*	,235**	0.00373368	0.200487	0.119719	,311**	0.19031
		Sig. (2-tailed)	0.0241808	0.0238631	0.0150991	0.833429	0.0278898	0.768506	0.00252705	0.0146482	0.496611	0.0706947	0.526682	3.021e-07	0.0348543	0.294975	0.0230204	0.00373567	0.00397637	0.0715732	0.308135	0.867087	0.193657	0.303625	0.536756	0.00354182	0.212653	0.000228834	0.0666694	0.0733292	0.586996	0.0633211	0.00405571	0.0968696	0.788532	0.00102902	0.311416	0.00168116	0.030441	0.00668097	0.864715	0.460079	0.035893	0.00910883	0.972459	0.0553377	0.23546	0.00174915	0.0541663
		N	128	128	128	126	89	88	89	89	111	122	121	126	125	84	128	128	128	119	101	88	125	124	103	91	125	127	126	127	98	113	89	95	105	124	125	125	122	123	124	125	125	122	88	92	100	99	103
	Total Sexual Offences against Children at the national level, police-recorded offences, rate per 100,000 children aged 17 or under	Correlation Coefficient	-,430**	-,437**	-,408**	-,200*	-0.198248	-0.174082	-,294*	-,340**	-0.101413	-0.11703	0.158914	-,540**	-,253*	0.15767	,247*	0.14936	,198*	0.158695	0.100502	-0.0503618	,354**	-,265**	,301**	,374**	-,308**	,457**	,307**	,395**	0.176612	0.174314	0.187357	0.221305	,238*	,527**	0.0773957	,419**	,311**	,385**	0.0514371	,213*	,295**	,334**	,281*	0.206878	0.171988	,415**	0.138467
		Sig. (2-tailed)	6.6345e-06	4.46277e-06	2.10527e-05	0.0456127	0.107792	0.158867	0.0158858	0.00489435	0.347132	0.25362	0.121989	6.56859e-09	0.0111789	0.206099	0.0122859	0.134057	0.0463305	0.126582	0.375067	0.67885	0.000275878	0.0081538	0.00635098	0.00120562	0.00183825	1.57892e-06	0.00180457	4.04187e-05	0.121912	0.0965433	0.117684	0.053084	0.0290227	1.80795e-08	0.444048	1.40154e-05	0.00180638	8.99371e-05	0.611284	0.0331954	0.00289646	0.000762453	0.0184509	0.0729602	0.127138	0.000160534	0.206301
		N	102	102	102	100	67	67	67	67	88	97	96	100	100	66	102	102	102	94	80	70	101	99	81	72	100	101	101	102	78	92	71	77	84	100	100	100	98	98	100	100	100	98	70	76	80	78	85
	Birth registration rate	Correlation Coefficient	-,886**	-,884**	-,872**	-,643**	-,684**	,490**	-,490**	-,721**	-,413**	,203*	-0.055902	-,392**	-0.125038	-,544**	,570**	,529**	,567**	,458**	,305**	-,422**	,647**	-,782**	,851**	,758**	-,900**	,483**	,829**	,803**	,768**	-,588**	,584**	,730**	,586**	,592**	-0.140534	,849**	,826**	,228**	-,257**	,346**	,302**	,566**	,210*	,223*	,572**	,212*	0.0453359
		Sig. (2-tailed)	1.48171e-56	5.77518e-56	7.80896e-53	3.86643e-20	3.1726e-19	4.38139e-09	3.88564e-09	6.14021e-22	1.21521e-07	0.0120862	0.493942	2.09388e-07	0.114014	1.09266e-10	1.1769e-15	2.28059e-13	1.77567e-15	1.60511e-09	0.000245707	1.67426e-05	2.29353e-20	5.18472e-34	5.70142e-41	3.09585e-26	9.82484e-59	6.35042e-11	1.75361e-42	1.52867e-38	2.78956e-27	1.09967e-14	7.52916e-12	3.06358e-21	3.70762e-13	1.66735e-16	0.0735655	8.42347e-46	1.14813e-40	0.00475462	0.00108178	5.92274e-06	9.98064e-05	1.16804e-14	0.0241423	0.0158929	6.01375e-12	0.0137228	0.660947
		N	166	166	166	161	130	128	129	129	152	152	152	164	161	121	166	166	166	157	140	97	160	159	142	134	160	163	163	165	134	143	115	120	128	160	163	161	158	152	159	163	161	157	115	116	122	134	96
	Percentage of women aged 20 to 24 years who were first married or in union before ages 18	Correlation Coefficient	,639**	,617**	,619**	,552**	,605**	-,587**	,343**	,603**	0.144522	-,198*	,247**	0.147172	-0.0941449	,266**	-,422**	-,331**	-,407**	-,425**	-,354**	0.135574	-,279**	,801**	-,706**	-,521**	,681**	-,298**	-,679**	-,500**	-,717**	,486**	-,468**	-,523**	-,341**	-,351**	0.0186177	-,628**	-,480**	-,205*	,181*	-,242**	-,415**	-,548**	-,225*	-,272**	-,446**	-,393**	-0.0547002
		Sig. (2-tailed)	1.89531e-15	2.92553e-14	2.37964e-14	7.30522e-11	2.09854e-13	2.81184e-12	0.000123251	3.26047e-13	0.11375	0.0369254	0.00824129	0.105737	0.30641	0.00654607	1.16926e-06	0.000188737	2.94908e-06	9.5131e-07	7.97251e-05	0.301679	0.00209869	6.94821e-28	8.07522e-20	7.68219e-10	1.21826e-17	0.000909219	7.98455e-18	3.7536e-09	2.96924e-19	5.58635e-08	8.94212e-07	3.21674e-08	0.00124752	9.21482e-05	0.838713	1.663e-14	4.87923e-08	0.0312504	0.0498869	0.0072881	2.49734e-06	2.39003e-10	0.0242104	0.00790409	2.62207e-05	1.37062e-05	0.686117
		N	123	123	123	119	121	118	120	120	121	111	113	122	120	103	123	123	123	123	119	60	119	119	123	122	120	121	122	123	114	112	100	98	87	119	122	120	116	111	118	122	120	115	100	94	82	115	57
	Percentage of children aged 5-14 engaged in child labour	Correlation Coefficient	,716**	,695**	,664**	,268**	,501**	-,455**	,235*	,577**	,304**	-0.136681	,230*	,380**	0.0273584	,401**	-,350**	-,354**	-,361**	-,339**	-,315**	,280*	-,237*	,620**	-,643**	-,475**	,721**	-,316**	-,714**	-,612**	-,626**	,441**	-,477**	-,445**	-,440**	-,368**	0.0292262	-,660**	-,630**	-0.147114	0.153049	-,203*	-,504**	-,595**	-,336**	-,471**	-,562**	-,360**	-0.229102
		Sig. (2-tailed)	6.76964e-19	1.81324e-17	1.44003e-15	0.00490809	2.51697e-08	6.47817e-07	0.0136601	4.24092e-11	0.00130642	0.168605	0.016772	3.99345e-05	0.775622	3.88544e-05	0.000152857	0.000128482	9.43123e-05	0.000251147	0.000965665	0.0380511	0.0126505	3.81356e-13	2.15857e-14	1.58593e-07	3.06591e-19	0.000770353	1.37718e-18	7.63294e-13	4.22251e-13	2.26978e-06	9.11431e-07	7.0363e-06	1.82116e-05	8.88922e-05	0.76075	6.15345e-15	1.71244e-13	0.136155	0.113796	0.0324325	2.29704e-08	9.35466e-12	0.00092363	2.51693e-06	4.92959e-08	0.000127051	0.0809132
		N	112	112	112	109	110	109	110	110	109	103	108	111	111	99	112	112	112	112	107	55	110	111	112	110	112	110	111	112	108	106	96	94	88	108	111	109	110	104	108	111	109	109	94	91	81	108	59
	Sex ratio at birth	Correlation Coefficient	-,480**	-,470**	-,445**	-,290**	-,306**	,218**	-,166*	-,341**	-,168*	,188*	-0.140628	-0.0303832	-,152*	-,594**	0.135445	0.12507	,158*	0.0728173	0.0607854	-0.055005	,402**	-,507**	,311**	,253**	-,510**	,194**	,383**	,372**	,510**	-,542**	,352**	,446**	,413**	,369**	-0.0411698	,412**	,455**	0.0600882	-,281**	,196**	,144*	,197**	0.0878535	0.138888	0.158806	-0.00796965	-0.104866
		Sig. (2-tailed)	1.39063e-12	4.72184e-12	8.39945e-11	6.00343e-05	0.000154797	0.00817246	0.0441525	2.3602e-05	0.030393	0.0116378	0.0665673	0.676499	0.0384314	1.45132e-13	0.0596972	0.082281	0.027591	0.324616	0.440827	0.552412	1.03856e-08	2.00892e-13	4.35969e-05	0.00184831	1.68518e-13	0.00745486	5.05643e-08	1.07615e-07	2.23421e-11	5.47709e-14	2.90928e-05	3.40112e-08	2.42288e-07	2.0322e-07	0.572767	4.26256e-09	1.23643e-10	0.424282	0.000100064	0.00672509	0.0487698	0.00820443	0.312781	0.109498	0.0638067	0.922372	0.280096
		N	194	194	194	186	148	146	147	147	167	179	171	191	186	128	194	194	194	185	163	119	188	184	167	149	183	190	190	192	151	165	135	140	145	187	190	188	181	179	186	190	188	179	134	134	137	152	108
	Access to electricity (% of population)	Correlation Coefficient	-,858**	-,849**	-,830**	-,589**	-,731**	,474**	-,429**	-,779**	-,470**	,222**	-0.131066	-,397**	-0.0205943	-,594**	,581**	,514**	,553**	,502**	,402**	-,288**	,582**	-,748**	,803**	,697**	-,876**	,386**	,851**	,783**	,831**	-,704**	,633**	,758**	,558**	,534**	-,152*	,816**	,780**	0.113438	-,240**	,339**	,343**	,596**	,248**	,277**	,552**	,216**	0.086253
		Sig. (2-tailed)	6.13131e-57	2.00857e-54	5.26352e-50	8.80914e-19	4.89718e-26	1.53953e-09	5.79011e-08	3.94181e-31	1.63834e-10	0.00286366	0.0875038	1.40407e-08	0.780241	1.43467e-13	1.05664e-18	2.44176e-14	8.51865e-17	4.46814e-13	1.22646e-07	0.00159315	2.36594e-18	5.09499e-34	1.99062e-38	7.25473e-23	5.88969e-59	3.64823e-08	7.38926e-54	1.26765e-40	1.49387e-39	7.89223e-26	2.36472e-16	3.4727e-27	4.29114e-13	5.20521e-15	0.0371663	1.36879e-45	6.85934e-38	0.132746	0.00104837	1.93583e-06	1.63138e-06	1.98362e-18	0.00399159	0.00123534	3.7951e-12	0.00761837	0.377033
		N	192	192	192	186	148	146	147	147	166	178	171	190	186	128	192	192	192	183	161	118	187	183	165	148	182	190	188	190	150	164	134	139	143	185	188	186	179	177	184	188	186	177	133	133	135	151	107
	Unemployment, total (% of total labor force) (modeled ILO estimate)	Correlation Coefficient	-0.0873921	-0.0736398	-0.0711678	-0.0236143	-,200*	,334**	0.011928	-0.13413	-,214**	0.135452	-,235**	0.000268124	0.111797	-0.0110246	-0.0306107	-0.0557629	-0.027679	-0.0186111	0.0229797	-0.0837112	0.0963745	-0.0696745	,176*	0.0205215	-0.111884	0.0555492	,168*	0.0990053	,171*	-0.0637689	0.0416264	0.014991	0.0455623	-0.082097	-0.125945	0.139527	0.151534	0.0788352	-0.13454	-0.0734627	0.0510908	0.119174	0.0136027	0.0253317	0.135506	0.0801293	0.151286
		Sig. (2-tailed)	0.257123	0.339902	0.356404	0.761955	0.019064	7.38056e-05	0.889972	0.118138	0.00758849	0.0847115	0.00214362	0.997231	0.146652	0.90288	0.691911	0.470136	0.720122	0.81473	0.784554	0.400525	0.212591	0.366611	0.0329125	0.813935	0.146336	0.4745	0.0300937	0.200311	0.0409823	0.439741	0.648935	0.868746	0.598394	0.294496	0.103794	0.0729926	0.0520243	0.326377	0.0849061	0.343967	0.513297	0.128531	0.882771	0.784497	0.125735	0.339725	0.129057
		N	170	170	170	167	137	135	137	137	154	163	169	170	170	125	170	170	170	161	144	103	169	170	147	134	170	168	167	169	143	149	122	124	136	165	168	166	165	157	165	168	166	164	120	119	129	144	102
	Youth unemployment rate (% of total labor force ages 15-24)	Correlation Coefficient	-,271**	-,257**	-,256**	-0.10268	-,312**	,427**	-0.0325763	-,288**	-,246**	,177*	-,288**	-0.121918	0.0619007	-0.1074	0.0973641	0.0476504	0.0922795	0.0989496	0.137078	-0.115729	0.118589	-,254**	,347**	,183*	-,297**	,160*	,330**	,274**	,341**	-,184*	,209*	0.129063	0.12559	0.0400599	-0.0989043	,306**	,295**	0.08295	-,175*	0.033402	,212**	,295**	0.105208	,194*	,265**	0.148033	,220*
		Sig. (2-tailed)	0.000344698	0.000699198	0.000768759	0.186688	0.000210394	2.41622e-07	0.705503	0.000645275	0.00211263	0.0238691	0.000148318	0.113238	0.42261	0.2332	0.20655	0.5372	0.231363	0.211733	0.10135	0.244383	0.124628	0.000813029	1.62455e-05	0.034407	8.18257e-05	0.0378883	1.33202e-05	0.000315903	3.11163e-05	0.0245398	0.0207673	0.153115	0.145151	0.609441	0.20213	6.03202e-05	0.00011678	0.301681	0.0249233	0.667321	0.00606836	0.000128126	0.252787	0.0348784	0.00238562	0.0766134	0.0263183
		N	170	170	170	167	137	135	137	137	154	163	169	170	170	125	170	170	170	161	144	103	169	170	147	134	170	168	167	169	143	149	122	124	136	165	168	166	165	157	165	168	166	164	120	119	129	144	102
	Income Gini coefficient	Correlation Coefficient	,417**	,409**	,388**	,337**	0.0156138	-0.0893059	-0.169378	0.0778326	,195*	-0.0907092	-0.0806145	-0.121026	-0.0735921	,544**	-,260**	-,162*	-,228**	-0.12635	-0.0113424	,239*	-,338**	,504**	-,248**	-0.0972379	,496**	-0.148504	-,419**	-,347**	-,279**	,470**	-0.0950012	-,363**	-,422**	-,224**	,231**	-,389**	-,420**	0.0200588	,278**	-,240**	0.105512	-0.0377636	0.0316824	0.0749199	-0.116569	,198*	,332**
		Sig. (2-tailed)	6.01664e-08	1.12138e-07	5.56737e-07	2.17247e-05	0.86279	0.321969	0.0600227	0.390211	0.0184463	0.274545	0.33173	0.133593	0.364383	2.65489e-10	0.00104302	0.0433319	0.004278	0.12727	0.895342	0.0204566	1.96148e-05	2.74335e-11	0.00357541	0.278727	5.92696e-11	0.065164	5.4273e-08	8.95511e-06	0.00131838	7.1143e-09	0.319068	4.35127e-05	1.06256e-06	0.00537208	0.00381185	6.78213e-07	7.74851e-08	0.80944	0.000518609	0.00262626	0.194277	0.647495	0.741325	0.426167	0.210708	0.0234499	0.00147262
		N	156	156	156	152	125	125	124	124	146	147	147	155	154	116	156	156	156	147	137	94	153	154	136	126	154	155	156	156	130	137	112	121	124	153	155	153	151	147	152	155	153	149	111	115	117	131	89
	Public debt as percentage of GDP	Correlation Coefficient	-,233**	-,234**	-,205**	0.0371696	-0.0503642	-0.127702	0.0639667	-0.141551	-0.0462782	-0.108156	-0.0814881	-,163*	0.113463	-0.0365752	,184*	0.120515	,157*	0.108502	0.0542673	-0.160319	0.0929786	-,162*	0.0395758	0.106458	-,174*	0.0207759	,221**	,297**	2.93494e-05	-0.0551469	0.04156	0.00306986	0.0953289	,218**	-0.103448	0.13674	,171*	0.0918653	-0.046247	0.0269967	0.0130668	0.102257	-0.116352	0.0834156	0.0138989	-0.0594901	,199*
		Sig. (2-tailed)	0.00159327	0.00154655	0.00556536	0.622309	0.554554	0.134099	0.454392	0.0964782	0.562419	0.159106	0.298104	0.0288796	0.132662	0.686732	0.0132306	0.106088	0.0347842	0.156542	0.506678	0.0898379	0.218359	0.0324954	0.623768	0.210609	0.0218139	0.781316	0.00299945	5.5361e-05	0.999723	0.494123	0.638724	0.971918	0.266048	0.00349179	0.168189	0.0695462	0.0250197	0.236284	0.5422	0.7198	0.862952	0.185851	0.189148	0.349214	0.875285	0.480325	0.0425572
		N	181	181	181	178	140	139	139	139	159	171	165	179	177	124	181	181	181	172	152	113	177	175	156	140	174	181	178	179	142	156	130	134	138	177	179	177	171	168	176	179	177	169	129	128	130	143	104
	GNI per capita, PPP (current international $)	Correlation Coefficient	-,866**	-,863**	-,851**	-,525**	-,682**	,407**	-,451**	-,743**	-,546**	0.0973979	-0.0828928	-,588**	-0.104848	-,422**	,523**	,494**	,507**	,432**	,342**	-,185*	,551**	-,728**	,786**	,698**	-,870**	,484**	,853**	,782**	,757**	-,538**	,622**	,712**	,484**	,588**	-0.144524	,804**	,757**	,153*	-,183*	,319**	,335**	,621**	,213*	,322**	,595**	,308**	0.0296306
		Sig. (2-tailed)	5.1549e-57	3.33127e-56	3.40744e-53	3.23052e-14	5.2152e-21	4.85387e-07	1.55494e-08	2.08328e-26	6.04407e-14	0.202375	0.285416	1.73004e-18	0.160112	9.5275e-07	2.31322e-14	8.77287e-13	1.74583e-13	2.20336e-09	1.21329e-05	0.0470439	7.9244e-16	8.84035e-31	5.1601e-35	2.29879e-22	6.69537e-56	3.05919e-12	4.93327e-53	3.77204e-39	8.05081e-29	2.24535e-13	1.68343e-15	1.68719e-22	1.14828e-09	3.02699e-18	0.0509444	2.56933e-42	7.30895e-34	0.0457574	0.0141435	1.06853e-05	4.04171e-06	8.24971e-20	0.0146834	0.000178817	4.26329e-14	0.000132962	0.764136
		N	185	185	185	181	144	142	143	143	162	173	168	184	181	125	185	185	185	176	156	116	182	179	161	144	178	185	183	184	148	160	132	137	141	181	183	181	175	172	180	183	181	173	131	131	133	149	105
	Social Capital Ranking	Correlation Coefficient	,458**	,456**	,457**	,237**	0.158109	-0.0101092	0.178391	,281**	0.16195	,213*	0.0187859	,607**	,415**	0.0338786	-,304**	-,259**	-,291**	-,224**	-,190*	0.0892657	-,320**	,343**	-,249**	-,428**	,425**	-,409**	-,469**	-,429**	-,254**	,180*	-,338**	-,278**	-,192*	-,436**	0.0176163	-,453**	-,340**	-,286**	-0.0155487	-,242**	-,407**	-,435**	-,248*	-,403**	-,296**	-,330**	-0.0656469
		Sig. (2-tailed)	4.91576e-09	5.96173e-09	5.44709e-09	0.00403936	0.0900512	0.913856	0.0553746	0.0022148	0.0615525	0.0106514	0.820718	3.08447e-16	1.54001e-07	0.725315	0.000174732	0.00146118	0.000338148	0.00815796	0.034085	0.387097	7.82923e-05	1.9232e-05	0.00517778	2.57873e-06	7.112e-08	2.39038e-07	2.06191e-09	5.52498e-08	0.00423728	0.0382039	0.000342897	0.00303654	0.0311568	4.1505e-08	0.832279	1.0386e-08	2.47052e-05	0.000527601	0.852741	0.00320654	3.68815e-07	3.73315e-08	0.0107206	1.64828e-05	0.00106612	0.00017104	0.527349
		N	148	148	148	146	116	117	116	116	134	143	148	148	148	110	148	148	148	139	124	96	147	148	125	112	148	148	147	148	125	133	108	112	126	145	147	145	147	143	145	147	145	147	105	107	119	125	95
	Proportion of households with internet at home (%)	Correlation Coefficient	-,844**	-,840**	-,834**	-,580**	-,676**	,443**	-,415**	-,724**	-,469**	-0.00382376	-0.0410044	-,502**	-,221**	-,488**	,435**	,395**	,447**	,343**	0.149789	-0.126111	,571**	-,790**	,726**	,673**	-,877**	,518**	,813**	,752**	,773**	-,594**	,440**	,656**	,500**	,560**	-,199*	,774**	,712**	0.129267	-,296**	,393**	0.145414	,376**	0.12958	,314**	,301**	0.110012	-0.041119
		Sig. (2-tailed)	1.40811e-38	7.51943e-38	6.21956e-37	1.71013e-13	6.04675e-15	3.43896e-06	1.46826e-05	8.545e-18	8.21833e-08	0.965158	0.640628	4.15401e-10	0.00970896	5.20315e-07	9.47153e-08	1.63058e-06	3.79961e-08	6.83969e-05	0.114947	0.223309	3.30378e-13	2.65629e-30	8.58359e-20	2.39909e-14	1.90636e-43	8.77106e-11	2.70151e-33	3.17966e-26	6.85784e-23	5.49505e-13	4.65475e-06	1.35454e-14	9.38695e-09	2.06719e-12	0.0199085	5.40759e-28	2.33458e-22	0.136592	0.000506159	2.2099e-06	0.0936508	6.33178e-06	0.203485	0.00126144	0.00134078	0.254797	0.692371
		N	138	138	138	135	102	101	102	102	118	133	132	137	136	95	138	138	138	129	112	95	137	136	113	99	133	137	136	137	109	122	100	108	117	134	136	134	136	134	134	136	134	136	98	103	111	109	95
	Proportion of households with computer (%)	Correlation Coefficient	-,895**	-,891**	-,883**	-,580**	-,686**	,398**	-,419**	-,769**	-,518**	0.04075	-0.069847	-,529**	-,197*	-,530**	,459**	,394**	,460**	,363**	0.182507	-,219*	,620**	-,796**	,810**	,698**	-,893**	,520**	,824**	,808**	,778**	-,571**	,476**	,711**	,533**	,620**	-,261**	,777**	,729**	0.079097	-,363**	,325**	0.120854	,414**	0.0634654	,226*	,375**	0.13678	-0.0939361
		Sig. (2-tailed)	2.1725e-45	2.97118e-44	1.2012e-42	1.35557e-12	3.21302e-14	8.67712e-05	2.95768e-05	2.12537e-19	6.73659e-09	0.65317	0.442683	2.32208e-10	0.027669	9.1691e-08	6.32869e-08	5.03603e-06	6.00174e-08	5.68907e-05	0.0650137	0.0426701	1.33872e-14	1.52117e-28	6.56589e-25	2.17565e-14	4.11775e-44	4.20372e-10	3.78097e-32	2.54371e-30	6.18092e-22	5.06129e-11	2.15905e-06	1.16029e-16	4.05263e-09	2.17319e-14	0.00328795	4.3916e-26	5.25058e-22	0.390483	3.77075e-05	0.000219535	0.183014	1.58507e-06	0.552332	0.0264833	8.96416e-05	0.170426	0.386808
		N	126	126	126	125	93	92	93	93	110	124	123	125	125	89	126	126	126	117	103	86	125	125	102	90	124	126	125	126	102	112	90	100	106	123	125	123	125	120	123	125	123	125	90	96	104	102	87
	Water depletion index	Correlation Coefficient	-0.0388187	-0.0318942	-0.0339699	-0.0246695	0.00224739	0.0679503	,199*	-0.049456	-,198*	-0.0516886	-,326**	0.0655526	,239**	-,257**	0.100971	0.0402458	0.112046	0.10207	-0.0303332	0.00195166	-,216**	-,157*	-0.0376537	-0.0675373	-0.128865	-0.126081	,165*	-0.0187881	0.154478	-,256**	-0.0031106	0.0101824	0.0306546	-0.142206	-,244**	0.0676685	0.0971659	0.0123306	-,182*	-0.0105546	-0.111894	-0.0830515	-0.169061	-,191*	-0.11763	-0.149252	-0.165413
		Sig. (2-tailed)	0.592942	0.660542	0.639955	0.738894	0.978522	0.418381	0.0166771	0.554697	0.0108907	0.491981	1.49544e-05	0.368874	0.0010303	0.00365208	0.163463	0.579411	0.121794	0.169158	0.702481	0.983194	0.00294118	0.0338015	0.631111	0.417959	0.0846976	0.0846904	0.0234315	0.796955	0.0608417	0.00099094	0.971653	0.905647	0.715309	0.0534922	0.00075671	0.358773	0.195683	0.870972	0.0136123	0.885693	0.12838	0.271768	0.0526394	0.0280358	0.17261	0.0692627	0.0901638
		N	192	192	192	185	146	144	145	145	164	179	169	190	185	126	192	192	192	183	161	119	188	182	165	146	180	188	188	190	148	163	133	138	144	185	188	186	179	176	184	188	186	177	132	132	136	149	106
	Renewable energy consumption (% of total final energy consumption)	Correlation Coefficient	,513**	,504**	,489**	,283**	,564**	-,424**	,266**	,626**	,283**	-,208**	,285**	,458**	-0.0348923	,473**	-,418**	-,415**	-,383**	-,404**	-,364**	0.130539	-,159*	,537**	-,659**	-,518**	,575**	-,312**	-,609**	-,417**	-,655**	,486**	-,468**	-,541**	-,314**	-,326**	0.126626	-,513**	-,458**	-0.0406542	,147*	-,228**	-,368**	-,452**	-0.113751	-,328**	-,464**	-,210*	-0.155975
		Sig. (2-tailed)	5.38741e-14	1.60202e-13	1.03814e-12	0.000111566	1.00283e-13	1.09327e-07	0.00116385	2.80451e-17	0.000228867	0.00570796	0.00015705	4.4892e-11	0.636354	1.68168e-08	2.328e-09	3.2171e-09	5.62933e-08	2.12373e-08	2.44905e-06	0.162502	0.0305234	4.45006e-15	1.10809e-21	2.15843e-11	1.97405e-17	1.48483e-05	3.47885e-20	3.02757e-09	1.33882e-19	6.32749e-11	1.32567e-08	8.71197e-12	0.000141464	6.89695e-06	0.0858783	1.1787e-13	1.46389e-10	0.594296	0.0484822	0.00177446	2.95112e-07	3.58217e-10	0.194049	0.000133178	1.60881e-08	0.0100026	0.110354
		N	188	188	188	182	147	145	146	146	165	176	171	187	186	128	188	188	188	179	159	116	185	183	163	146	182	186	185	187	149	161	133	137	142	182	185	183	177	174	181	185	183	175	132	131	134	150	106
**. Correlation is significant at the 0.01 level (2-tailed).
*. Correlation is significant at the 0.05 level (2-tailed).
[truncated: 19 more columns]

## Sheet: Table S2
Table S2 – 50 representative indicators selected based on correlation analysis
Theme	Subtheme	Criterion	Indicator	Covered countries	Reference
Health	Nutrition	Low birth weight	Percentage of infants born with low birth weight (< 2500 g)	187	1
		Overweight and obesity	Overweight (including obesity, %)	146
		Underweight	Underweight (moderate and severe, %)	148
		Breast feeding	Exclusive breastfeeding < six months (%)	167
	Child mortality	Under-five mortality	Under-five mortality rate (probability of dying by age five per 1000 live births)	195
	Oral health	Dental treatments	DMFT (decayed, missing or filled teeth) among 12-year-olds	180	2
	Hazardous pollutant	Household and ambient air pollution	Mortality rate attributed to household and ambient air pollution (per 100,000 population)	172	3
		PM2.5 air pollution	PM2.5 air pollution, population exposed to levels exceeding WHO guideline value (% of total)	187
	Immunization coverage	Diphtheria tetanus toxoid and pertussis (DTP3) immunization	Diphtheria tetanus toxoid and pertussis (DTP3) immunization coverage among one-year-olds (%)	195	1
		Bacillus Calmette-Guérin (BCG) immunization	BacilleCalmette-Guérin (vaccine against tuberculosis) immunization coverage among one-year-olds (%)	164
	Risk behavior	Alcohol use	15-19 years old heavy episodic drinkers (population), % by country	189	3
		Adolescent fertility	Adolescent fertility rate (per 1,000 girls aged 15-19 years)	184
	Eating and physical behavior	Physical activity	Comparable estimates of prevalence of insufficient physical activity (adolescents 11-17 years)	120	4
	Maternal health	Antenatal care	Percentage of women aged 15-49 years attended at least once during pregnancy by skilled health personnel (doctor, nurse or midwife)	149	1
	Mental health	Suicide	Suicide rate, 15-29 year olds, per 100000	171	5
	Health expenditure	Public health expenditure	Health expenditure, public (% of total health expenditure)	190	3.6
	HIV	HIV prevalence among youth	Estimated percentage of young men and women (aged 15-24) living with HIV	128	7.8
Education	School attainment	Repetition	Repetition rate in primary education (all grades), both sexes (%)	152	9
	Completion of education	Primary school completion	Gross graduation ratio from primary education, both sexes	107
		Secondary school completion	Gross graduation ratio from lower secondary education, both sexes (%)	114
		Tertiary school completion	Gross graduation ratio from first degree programmes (ISCED 6 and 7) in tertiary education, both sexes (%)	120
	Attendance of education	Enrolment in primary school	Gross enrolment ratio, primary, both sexes (%)	191
		Enrolment in secondary school	Gross enrolment ratio, secondary, both sexes (%)	188
	Early childhood education	Enrolment of kindergarten	Gross enrolment ratio, pre-primary, both sexes (%)	187
	Government support on education	Public expenditure on education	Government expenditure on education as % of GDP	179
	Gender equality	Gender equality in enrolment	Gross enrolment ratio, pre-primary, gender parity index (GPI)	176
			Gross enrolment ratio, primary, gender parity index (GPI)	190
			Gross enrolment ratio, secondary, gender parity index (GPI)	187
			Gross enrolment ratio, tertiary, gender parity index (GPI)	177
		Gender equality in graduation	Gross graduation ratio from primary education, gender parity index (GPI)	134
			Gross graduation ratio from lower secondary education, gender parity index (GPI)	134
			Gross graduation ratio from first degree programmes (ISCED 6 and 7) in tertiary education, gender parity index (GPI)	137
		Gender equality in youth literacy	Youth literacy rate, population 15-24 years, gender parity index (GPI)	152
Safety	Violence and crime	Juvenile delinquency	Juveniles held in prisons, penal institutions or correctional institutions	108	10
			Juveniles brought into formal contact with the police and/or criminal justice system, all crimes	108
		Criminal victimisation	Intentional homicide count and rate per 100,000 population	195
			Assault and major assault rates in different countries (police recorded assaults/100,000 population)	128
		Sexual violence against children	Total sexual offences against children at the national level, police-recorded offences, rate per 100,000 children aged 17 or under	102
	Birth registration	Registration of newborns	Birth registration rate	166	1
	Child labour	Children involved in child labor	Percentage of children five-14 years old involved in child labour	112
	Child marriage	Children married or in union	Percentage of women aged 20 to 24 years who were first married or in union before ages 18	123
	Demographic structure	Sex ratio	Sex ratio at birth	191	11, 12
Economic status	Housing quality	Risk housing	Access to electricity (% of population)	191	6
	Macroeconomic situation	Youth unemployment	Youth unemployment rate (% of total labor force ages 15-24)	170
		Income equality at societal level	Income Gini coefficient	156	13
		National debts	Public debt as percentage of GDP	179	14
Relationship	Community relationship	Social capital	Social Capital Ranking	148	15
Participation	Social media connection	Internet access in home	Proportion of households with internet access at home	138	16
Environmental aspects	Freshwater vulnerability	Risk of depleting freshwater resources	Water depletion index (WDI)	192	17
	Renewable energy consumption	Consumption of renewable energy	Renewable energy consumption (% of total final energy consumption)	180	6

## Sheet: Table S3
Table S3 – The indicator values, SCDI scores as well as the country ranking and classification for the 138 countries
	Health										Education								Safety		Economic status			Environmental aspect		Health										Education								Safety		Economic status			Environmental aspect
	Child mortality	Immunisation coverage	Nutrition	Risk behavior		Hazardous pollutant		Mental health	Oral health	Health expenditure	Early childhood education	Attendance of education		Gender equality				Government support on eduction	Violence and crime	Demographic structure	Risk housing	Macroeconomic situation		Freshwater vulnerability	Renewable energy consumption	Child mortality	Immunisation coverage	Nutrition	Risk behavior		Hazardous pollutant		Mental health	Oral health	Health expenditure	Early childhood education	Attendance of education		Gender equality				Government support on eduction	Violence and crime	Demographic structure	Risk housing	Macroeconomic situation		Freshwater vulnerability
	Under-5 mortality rate (per 1,000 live births)	Diphtheria tetanus toxoid and pertussis (DTP3) immunization coverage among 1-year-olds (%)	Percentage of infants born with low birth weight (<2500g.)	15-19 years old heavy episodic drinkers (population), % by country	Adolescent fertility rate (per 1000 girls aged 15-19 years)	PM2.5 air pollution, population exposed to levels exceeding WHO guideline value (% of total)	Mortality rate attributed to household and ambient air pollution (per 100 000 population)	Suicide rate, 15-29 year-olds, per 100000	DMFT (decayed, missing or filled teeth) among 12-year-olds (number)	Health expenditure, public (% of total health expenditure)	Gross enrolment ratio, pre-primary, both sexes (%)	Gross enrolment ratio, primary, both sexes (%)	Gross enrolment ratio, secondary, both sexes (%)	Gross enrolment ratio, pre-primary, gender parity index (GPI)	Gross enrolment ratio, primary, gender parity index (GPI)	Gross enrolment ratio, secondary, gender parity index (GPI)	Gross enrolment ratio, tertiary, gender parity index (GPI)	Government expenditure on education as % of GDP (%)	Intentional homicide, rates per 100,000 population	Sex ratio at birth	Access to electricity (% of population)	Youth unemployment rate (% of total labor force ages 15-24)	Public debt as percentage of GDP	Water depletion index	Renewable energy consumption (% of total final energy consumption)	Under-5 mortality rate (per 1,000 live births)	Diphtheria tetanus toxoid and pertussis (DTP3) immunization coverage among 1-year-olds (%)	Percentage of infants born with low birth weight (<2500g.)	15-19 years old heavy episodic drinkers (population), % by country	Adolescent fertility rate (per 1000 girls aged 15-19 years)	PM2.5 air pollution, population exposed to levels exceeding WHO guideline value (% of total)	Mortality rate attributed to household and ambient air pollution (per 100 000 population)	Suicide rate, 15-29 year-olds, per 100000	DMFT (decayed, missing or filled teeth) among 12-year-olds (number)	Health expenditure, public (% of total health expenditure)	Gross enrolment ratio, pre-primary, both sexes (%)	Gross enrolment ratio, primary, both sexes (%)	Gross enrolment ratio, secondary, both sexes (%)	Gross enrolment ratio, pre-primary, gender parity index (GPI)	Gross enrolment ratio, primary, gender parity index (GPI)	Gross enrolment ratio, secondary, gender parity index (GPI)	Gross enrolment ratio, tertiary, gender parity index (GPI)	Government expenditure on education as % of GDP (%)	Intentional homicide, rates per 100,000 population	Sex ratio at birth	Access to electricity (% of population)	Youth unemployment rate (% of total labor force ages 15-24)	Public debt as percentage of GDP	Water depletion index
	Indicator value																									Normalized score for indicators
Albania	14	98	3.6	21.5	21.8354	100	171	5.3	3.7	49.912	88.5584	113.7	95.7655	0.9741	0.96706	0.936	1.39866	3.53944	4	1.078	100	29.2	73.682	0.27	38.6895	0.933333	0.98	0.91	0.609091	0.900748	0	0.43	0.894	0.383333	0.472757	0.92849	0.89852	0.974336	0.982733	0.952943	0.962353	0.938192	0.155869	0.96	0.93	1	0.550769	0.877197	0.73
Algeria	25.5	95	6	0.1	10.4716	100	32	2.2	2.3	72.7628	79.2128	116.154	99.8602	1.00659	0.94266	1.03655	1.55961	4.35425	1.5	1.05	100	20	8.811	0.92	0.0687754	0.878571	0.95	0.85	0.998182	0.952402	0	0.893333	0.956	0.616667	0.713293	0.87008	0.880337	0.999153	0.995607	0.918086	0.9785	0.913239	0.197654	0.985	1	1	0.692308	0.985315	0.08
Angola	156.9	64	12	4.2	161.932	100	104	21.4	1.7	64.2553	79.2482	128.704	28.8987	1.47021	0.63983	0.64825	0.79339	3.47623	9.8	1.03	32	10.5	65.438	0.3	50.7975	0.252857	0.64	0.7	0.923636	0.263945	0	0.653333	0.572	0.716667	0.62374	0.870301	0.787377	0.569083	0.686527	0.485471	0.793088	0.967967	0.152627	0.902	0.95	0.32	0.838462	0.890937	0.7
Argentina	12.5	94	7.2	15.1	63.7888	97.33	26	13.8	5.3441	55.4267	71.6621	110.566	106.323	1.01405	0.98972	1.07585	1.60877	5.32549	7.6	1.04	100	21.3	52.034	0.38	10.7731	0.940476	0.94	0.82	0.725455	0.710051	0.0267	0.913333	0.724	0.109317	0.530807	0.822888	0.921733	0.961678	0.990633	0.985314	0.955382	0.905617	0.247461	0.924	0.975	1	0.672308	0.913277	0.62
Armenia	14.1	94	8	20.6	22.4606	100	125	2.8	2.4	42.9824	52.3952	98.4666	88.5024	1.02927	1.00034	1.01056	1.12863	2.81351	2	1.138	100	35.1	43.03	0.95	7.72473	0.932857	0.94	0.8	0.625455	0.897906	0	0.583333	0.944	0.6	0.399815	0.70247	0.988642	0.930317	0.980487	0.999514	0.993788	0.980057	0.118642	0.98	0.78	1	0.46	0.928283	0.05
Australia	3.8	93	6.2	19.6	13.844	0.14	0.4	12.2	1.05	67.0388	124.92	102.208	137.565	0.97161	0.99783	0.94644	1.40312	5.22534	1	1.055	100	13.1	37.626	0.91	9.49757	0.981905	0.93	0.845	0.643636	0.937073	0.9986	0.998667	0.756	0.825	0.65304	0.84425	0.983646	0.772335	0.981073	0.9969	0.968494	0.937501	0.242325	0.99	0.9875	1	0.798462	0.93729	0.09
Austria	3.5	98	6.9	34.6	6.786	100	34	9.5	1.4	77.864	103.365	102.97	100.022	1.01619	0.98629	0.95428	1.20348	5.49955	0.5	1.055	100	9.2	85.544	0.18	35.7839	0.983333	0.98	0.8275	0.370909	0.969155	0	0.886667	0.81	0.766667	0.766989	0.978969	0.977999	0.999867	0.989207	0.980414	0.973106	0.968453	0.256387	0.995	0.9875	1	0.858462	0.857427	0.82
Bahrain	6.2	98	9.9	0	13.4214	100	11	8.7	1.4	63.2529	55.8583	101.171	102.131	0.98284	1.0123	0.99534	1.92068	2.66808	0.5	1.039	100	10.9	66.014	1	0	0.970476	0.98	0.7525	1	0.938994	0	0.963333	0.826	0.766667	0.613189	0.724115	0.991325	0.987085	0.98856	0.982429	0.997259	0.857259	0.111184	0.995	0.9725	1	0.832308	0.889977	0
Barbados	13	97	11.5	19.2	39.4398	100	18	2.2	0.86	63.5218	84.2061	93.6273	109.248	1.03475	1.01127	1.026	2.24551	6.5733	8.8	1.036	100	26.8	106.668	0.46	3.16776	0.938095	0.97	0.7125	0.650909	0.820728	0	0.94	0.956	0.856667	0.616018	0.901288	0.952795	0.943954	0.976833	0.9839	0.984706	0.806898	0.311451	0.912	0.965	1	0.587692	0.82222	0.54
Belarus	4.6	99	5.1	33.5	17.551	100	104	20.1	2.1	65.7865	103.229	101.342	107.119	0.95377	0.99954	0.98697	1.32676	4.94765	3.6	1.06	100	12	53.039	0.11	6.63418	0.978095	0.99	0.8725	0.390909	0.920223	0	0.653333	0.598	0.65	0.639858	0.979818	0.990062	0.956852	0.96918	0.999343	0.992335	0.94934	0.228085	0.964	0.975	1	0.815385	0.911602	0.89
Belgium	4.1	99	7	45.4	8.0566	100	30	9.5	0.9	77.8686	116.403	104.193	166.808	0.99531	1.00034	1.1364	1.3135	6.58514	1.8	1.05	100	23.6	105.761	0.86	9.03806	0.980476	0.99	0.825	0.174545	0.963379	0	0.9	0.81	0.85	0.767038	0.897481	0.968941	0.5951	0.996873	0.999514	0.919765	0.951395	0.312058	0.982	1	1	0.636923	0.823732	0.14
Belize	16.5	94	11.1	7	65.135	100	19	1.6	0.6	67.0183	49.6757	113.139	80.7922	1.02592	0.95272	1.02497	1.60633	6.42584	34.4	1.03	92.4512	22	82.567	0.01	36.544	0.921429	0.94	0.7225	0.872727	0.703932	0	0.936667	0.968	0.9	0.652825	0.685473	0.902678	0.883589	0.98272	0.932457	0.985312	0.905995	0.303889	0.656	0.95	0.924512	0.661538	0.862388	0.99
Benin	99.5	79	15	3.2	81.775	100	92	5.5	0.8	48.9998	23.9007	128.983	56.812	1.02166	0.92155	0.70148	0.37434	4.35981	6.3	1.041	34.1	1.7	42.425	0.55	48.6007	0.52619	0.79	0.625	0.941818	0.628295	0	0.693333	0.89	0.866667	0.463156	0.524379	0.785308	0.738254	0.98556	0.887929	0.8244	0.902998	0.197939	0.937	0.9775	0.341	0.973846	0.929292	0.45
Bhutan	32.9	99	9.9	0.2	20.179	99.83	60	15.7	0.8	73.1886	25.7993	102.132	84.1977	1.07707	1.01443	1.06927	0.73578	7.36169	2.7	1.04	100	10	94.35	0.01	86.6605	0.843333	0.99	0.7525	0.996364	0.908277	0.0017	0.8	0.686	0.866667	0.717775	0.536246	0.98421	0.904228	0.94862	0.979386	0.959253	0.959036	0.351882	0.973	0.975	1	0.846154	0.84275	0.99
Bolivia (Plurinational State of)	38.4	99	6	8.7	70.431	100	52	20.6	4.7	72.0679	70.7316	97.138	86.4051	1.00371	0.97215	0.9838	0.83642	7.28546	12.4	1.05	90.0387	5.2	40.647	0.22	16.818	0.817143	0.99	0.85	0.841818	0.679859	0	0.826667	0.588	0.216667	0.705978	0.817073	0.9788	0.917606	0.997527	0.960214	0.990471	0.974639	0.347972	0.876	1	0.900387	0.92	0.932255	0.78
Botswana	43.6	95	13	4.6	30.9728	99.38	38	4.5	0.5	59.0148	18.3329	108.572	83.9183	0.98702	0.97126	1.05639	1.36939	9.63292	14.8	1.03	56.4823	33.9	15.858	0.97	29.1685	0.792381	0.95	0.675	0.916364	0.859215	0.0062	0.873333	0.91	0.916667	0.568577	0.489581	0.936501	0.902535	0.991347	0.958943	0.966829	0.94273	0.468355	0.852	0.95	0.564823	0.478462	0.97357	0.03
Brazil	16.4	96	8.5	21.7	66.7434	55.8	21	6.7	2.8	46.0391	92.1772	115.341	99.651	0.98641	0.97487	1.0511	1.39809	5.99395	24.6	1.05	99.6502	15.2	72.515	0.08	41.8109	0.921905	0.96	0.7875	0.605455	0.696621	0.442	0.93	0.866	0.533333	0.431991	0.951108	0.886365	0.997885	0.99094	0.9641	0.969941	0.938281	0.281741	0.754	1	0.996502	0.766154	0.879142	0.92
Brunei Darussalam	10.2	99	11.9	15.2	20.7876	0	0.2	6	0.6	93.8601	71.9985	108.138	96.0795	1.02178	1.00052	1.00409	1.6473	3.35319	0.5	1.055	100	11.1	2.953	0.01	0.0139762	0.951429	0.99	0.7025	0.723636	0.905511	1	0.999333	0.88	0.9	0.935369	0.82499	0.939721	0.976239	0.98548	0.999257	0.997594	0.899643	0.146317	0.995	0.9875	1	0.829231	0.995078	0.99
Bulgaria	10.4	91	8.8	26.9	36.8366	100	175	8	3.1	54.574	82.9123	97.2182	99.0164	0.98334	0.989	0.96856	1.26784	4.06197	1.6	1.061	100	25.9	25.645	0.56	16.9671	0.950476	0.91	0.78	0.510909	0.832561	0	0.416667	0.84	0.483333	0.521831	0.893202	0.979394	0.994038	0.988893	0.984286	0.981506	0.958474	0.182665	0.984	0.9725	1	0.601538	0.957258	0.44
Burkina Faso	88.6	91	14.1	3.7	107.151	100	96	4.8	0.7	52.2951	4.14232	87.9926	33.6667	0.99723	0.95773	0.91912	0.4922	4.06224	0.7	1.046	19.2	5	32.521	0.52	76.4812	0.578095	0.91	0.6475	0.932727	0.512948	0	0.68	0.904	0.883333	0.497843	0.40089	0.911057	0.59798	0.998153	0.939614	0.952424	0.921271	0.182679	0.993	0.99	0.192	0.923077	0.945798	0.48
Burundi	81.7	94	12.9	4	27.8548	100	106	27.3	1	52.733	12.6302	123.782	42.4801	1.01969	1.01167	0.91072	0.31351	5.41642	4	1.03	7	10.7	46.005	0.01	90.0466	0.610952	0.94	0.6775	0.927273	0.873387	0	0.646667	0.454	0.833333	0.502452	0.453939	0.823839	0.651394	0.986873	0.983329	0.947482	0.893567	0.252124	0.96	0.95	0.07	0.835385	0.923325	0.99
Cambodia	28.7	89	11.3	9.9	52.1718	100	71	13	5.5	22.0423	17.9438	116.657	45.0513	1.06656	0.99286	0.85457	0.82062	1.90197	1.8	1.049	56.1	0.9	32.537	0.03	67.9533	0.863333	0.89	0.7175	0.82	0.762855	0	0.763333	0.74	0.0833333	0.179393	0.487149	0.876614	0.666978	0.955627	0.9898	0.914453	0.972189	0.0718959	0.982	0.9975	0.561	0.986154	0.945772	0.97
Cameroon	87.9	84	11	4.4	102.36	100	90	7.9	1.5	22.873	37.8333	117.134	58.0781	1.01269	0.89658	0.85561	0.77353	3.0299	2.7	1.03	56.8	6.7	27.122	0.39	77.3882	0.581429	0.84	0.725	0.92	0.534727	0	0.7	0.842	0.75	0.188137	0.611458	0.873083	0.745928	0.99154	0.852257	0.915065	0.964888	0.129738	0.973	0.95	0.568	0.896923	0.954797	0.61
Canada	4.9	91	6.1	33.2	9.4578	0.01	5.4	10	1	70.9304	73.6379	100.572	109.932	0.99213	1.01068	1.00188	1.34022	5.28122	1.4	1.056	100	13.4	91.55	0.0708674	22.5758	0.976667	0.91	0.8475	0.396364	0.95701	0.9999	0.982	0.8	0.833333	0.694004	0.835237	0.995761	0.939809	0.994753	0.984743	0.998894	0.947253	0.245191	0.986	0.985	1	0.793846	0.847417	0.929133
Cape Verde	24.5	93	6	3.8	73.1564	100	58	2.5	2.8	74.7364	73.652	109.888	92.8984	0.98811	0.94507	1.12069	1.39357	4.99245	10.6	1.03	90.188	18.8	127.922	1	26.1964	0.883333	0.93	0.85	0.930909	0.667471	0	0.806667	0.95	0.533333	0.734068	0.835325	0.926756	0.95696	0.992073	0.921529	0.929006	0.938981	0.230382	0.894	0.95	0.90188	0.710769	0.786797	0
Central African Republic	130.1	47	13.7	3.2	90.6588	100	96	13.1	4.1	48.9722	5.58951	93.4557	17.378	1.01733	0.74333	0.51273	0.35989	1.22393	13.2	1.03	12.3297	11.9	48.498	0.01	77.1917	0.380476	0.47	0.6575	0.941818	0.587915	0	0.68	0.738	0.316667	0.462866	0.409934	0.951524	0.499261	0.988447	0.633329	0.713371	0.900758	0.0371246	0.868	0.95	0.123297	0.816923	0.91917	0.99
Chile	8.1	96	5.9	27.3	47.5032	99.94	22	16.5	1.9	49.4654	87.0031	101.644	100.646	0.97585	0.96817	1.01346	1.13678	4.92324	3.6	1.04	100	16.4	17.373	0.688086	26.4153	0.961429	0.96	0.8525	0.503636	0.784076	0.0006	0.926667	0.67	0.683333	0.468057	0.91877	0.987824	0.996084	0.9839	0.954529	0.992082	0.978794	0.226833	0.964	0.975	1	0.747692	0.971045	0.311914
China	10.7	99	2.38	12	7.2612	100	163	4.2	0.5	55.7867	83.6167	104.125	94.2992	1.00691	1.00326	1.02599	1.1862	1.8873	0.8	1.16	100	10.5	42.606	0.577079	17.0995	0.949048	0.99	0.9405	0.781818	0.966995	0	0.456667	0.916	0.916667	0.534597	0.897605	0.969443	0.96545	0.995393	0.995343	0.984712	0.971132	0.0711436	0.992	0.725	1	0.838462	0.92899	0.422921
Colombia	15.9	91	9.5	11	48.6822	96	24	8	1.7	75.1246	84.4917	113.563	98.0919	0.99322	0.96678	1.07128	1.16247	4.49099	27.9	1.05	97.7909	18.9	50.667	0.016522	24.517	0.924286	0.91	0.7625	0.8	0.778717	0.04	0.92	0.84	0.716667	0.738153	0.903073	0.899535	0.988436	0.99548	0.952543	0.958071	0.974811	0.204666	0.721	1	0.977909	0.709231	0.915555	0.983478
Costa Rica	9.7	92	7.3	9.4	56.0262	99.86	19	7.9	2.5	72.6675	52.3721	109.818	123.086	0.99124	0.99428	1.04025	1.30728	7.17601	10	1.05	99.3593	19.2	40.83	0.0129582	37.8689	0.95381	0.92	0.8175	0.829091	0.745335	0.0014	0.936667	0.842	0.583333	0.712289	0.702326	0.927277	0.860086	0.99416	0.991829	0.976324	0.95236	0.342359	0.9	1	0.993593	0.704615	0.93195	0.987042
Côte d'Ivoire	92.6	83	17	14.4	135.626	99.98	90	8.5	1.8	29.3642	7.15898	93.6345	43.8677	1.00908	0.88722	0.71802	0.66193	5.03422	11.4	1.03	61.9	5.8	47.819	0.125066	70.8353	0.559048	0.83	0.575	0.738182	0.383518	0.0002	0.7	0.83	0.7	0.256465	0.419744	0.952848	0.659804	0.993947	0.838886	0.834129	0.947586	0.232524	0.886	0.95	0.619	0.910769	0.920302	0.874934
Croatia	4.3	94	4.95	28.2	9.17	100	90	8	4.8	81.8671	62.7256	97.9642	98.2165	0.96234	1.00249	1.04909	1.35681	4.5816	0.8	1.059	100	45.9	86.744	0.171245	33.6466	0.979524	0.94	0.87625	0.487273	0.958318	0	0.7	0.84	0.2	0.809127	0.767035	0.98492	0.989191	0.974893	0.996443	0.971124	0.944681	0.209313	0.992	0.9775	1	0.293846	0.855427	0.828755
Cyprus	2.7	97	11.5	29.6	4.8922	100	20	5.9	1.3	45.2252	80.2753	99.3001	99.7783	0.98648	0.99981	0.99277	1.35772	6.13839	0.1	1.07	100	35.7	107.533	0.749449	9.38914	0.987143	0.97	0.7125	0.461818	0.977763	0	0.933333	0.882	0.783333	0.423423	0.876721	0.994816	0.998656	0.990987	0.999729	0.995747	0.94454	0.289148	0.999	0.95	1	0.450769	0.820778	0.250551
Czech Republic	3.4	99	8	28	9.6826	100	59	10.6	2.6	84.5372	105.904	99.747	105.562	0.97226	1.0037	1.00989	1.40742	4.08902	0.7	1.058	100	16.7	40.314	0.144734	12.7527	0.98381	0.99	0.8	0.490909	0.955988	0	0.803333	0.788	0.566667	0.837234	0.963098	0.998126	0.966293	0.981507	0.994714	0.994182	0.936834	0.184052	0.993	0.98	1	0.743077	0.93281	0.855266
Democratic Republic of the Congo	98.3	81	9.5	13.7	122.277	100	116	14.9	0.75	36.9286	4.17377	106.973	43.5052	1.07406	0.90906	0.62181	0.45531	2.24535	12.5	1.03	13.5	11.9	18.807	0.01	92.8713	0.531905	0.81	0.7625	0.750909	0.444197	0	0.613333	0.702	0.875	0.336091	0.401086	0.948347	0.657607	0.950627	0.870086	0.777535	0.915552	0.0895051	0.875	0.95	0.135	0.816923	0.968655	0.99
Denmark	3.5	93	5.4	42.7	3.9608	78.8	20	5.7	0.4	84.7642	95.9233	101.516	130.825	1.00196	0.98472	1.03969	1.38157	8.62711	1	1.056	100	12.4	39.554	0.28173	30.2199	0.983333	0.93	0.865	0.223636	0.981996	0.212	0.933333	0.886	0.933333	0.839623	0.974521	0.98877	0.813183	0.998693	0.978171	0.976653	0.940842	0.416775	0.99	0.985	1	0.809231	0.934077	0.71827
Dominican Republic	30.9	85	11	16.7	97.3396	82	29	3.3	4.4	66.8996	44.0049	103.491	77.8207	1.05105	0.91309	1.10234	1.83592	2.04457	17.4	1.05	98.471	31.4	33.047	0.304301	18.3785	0.852857	0.85	0.725	0.696364	0.557547	0.18	0.903333	0.934	0.266667	0.651574	0.650031	0.974144	0.86558	0.965967	0.875843	0.9398	0.8704	0.0792087	0.826	1	0.98471	0.516923	0.944922	0.695699
Ecuador	21.6	78	8.6	10.6	75.5964	91.77	15	15.7	4.85	49.2098	71.0449	113.817	107.701	1.03351	1.00253	1.03901	1.3099	4.96322	8.2	1.05	98.9761	10.8	22.608	0.188193	12.2181	0.897143	0.78	0.785	0.807273	0.65638	0.0823	0.95	0.686	0.191667	0.465367	0.81903	0.897649	0.953329	0.97766	0.996386	0.977053	0.951953	0.228883	0.918	1	0.989761	0.833846	0.96232	0.811807
Egypt	24	93	13	0	51.3308	100	52	1.9	0.4	38.2017	30.3225	103.93	86.1023	0.98108	0.9971	0.99455	0.96422	3.75873	3.2	1.05	99.8	42	88.458	1	6.41256	0.885714	0.93	0.675	1	0.766678	0	0.826667	0.962	0.933333	0.349492	0.564515	0.970891	0.915772	0.987387	0.995857	0.996794	0.994453	0.167114	0.968	1	0.998	0.353846	0.85257	0
El Salvador	16.8	91	8.7	6.3	64.9156	100	45	17.6	1.5	65.9959	72.1715	109.179	79.4254	1.02407	0.95866	1.00503	1.10396	3.54506	64.2	1.05	95.1254	11.7	58.723	0.01	28.1655	0.92	0.91	0.7825	0.885455	0.704929	0	0.85	0.648	0.75	0.642062	0.826072	0.932006	0.875306	0.983953	0.940943	0.997041	0.983882	0.156157	0.358	1	0.951254	0.82	0.902128	0.99
Eritrea	46.5	95	14	5.8	53.0018	100	76	8.3	0.6	45.7558	13.2289	49.6371	30.5499	0.98132	0.86376	0.85308	0.49698	2.127	9.7	1.052	45.8334	10.9	127.126	1	80.3048	0.778571	0.95	0.65	0.894545	0.759083	0	0.746667	0.834	0.9	0.429009	0.457681	0.626941	0.57909	0.987547	0.805371	0.913576	0.922012	0.0834359	0.903	0.995	0.458334	0.832308	0.788123	0
Estonia	2.9	93	4.6	36.9	12.4362	15.25	54	13.3	2.7	78.8237	88.3741	98.4112	115.178	0.97335	1.00248	0.99251	1.5314	5.48164	3.1	1.061	100	17	10.052	0.0151937	25.2491	0.98619	0.93	0.885	0.329091	0.943472	0.8475	0.82	0.734	0.55	0.777092	0.927338	0.988231	0.908011	0.982233	0.996457	0.995594	0.917612	0.255469	0.969	0.9725	1	0.738462	0.983247	0.984806
Ethiopia	59.2	86	20	3.1	56.6122	100	57	10.7	1.3	58.7097	30.3618	102.122	35.1733	0.94743	0.90892	0.95886	0.48144	4.50051	8	1.04	27.2	7.1	54.553	0.515712	92.719	0.718095	0.86	0.5	0.943636	0.742672	0	0.81	0.786	0.783333	0.565365	0.564761	0.984281	0.607111	0.964953	0.869886	0.9758	0.919603	0.205154	0.92	0.975	0.272	0.890769	0.909078	0.484288
Fiji	22.4	99	10.2	20.7	45.1952	0	77	3.8	1.5	65.8097	17.8705	105.545	88.6683	1.07496	0.99114	1.10828	1.19385	3.88289	3	1.06	100	18.6	48.361	0.01	37.5684	0.893333	0.99	0.745	0.623636	0.794567	1	0.743333	0.924	0.75	0.640102	0.486691	0.958927	0.931323	0.950027	0.987343	0.936306	0.969946	0.173482	0.97	0.975	1	0.713846	0.919398	0.99
Finland	2.3	98	4.2	31.8	6.3768	0.1	6	18.8	0.7	75.3087	79.2934	101.534	149.456	0.99579	0.99762	1.09455	1.20729	7.1681	1.6	1.044	100	19.2	63.663	0.195412	41.1913	0.989048	0.98	0.895	0.421818	0.971015	0.999	0.98	0.624	0.883333	0.740092	0.870584	0.988639	0.700266	0.997193	0.9966	0.944382	0.967862	0.341954	0.984	0.985	1	0.704615	0.893895	0.804588
France	4.3	98	6.6	48.5	8.8148	92.13	17	7.6	1.2	78.2053	108.807	105.358	110.644	0.99798	0.99283	1.0105	1.22571	5.49299	1.2	1.052	100	23.9	96.164	0.217086	13.1326	0.979524	0.98	0.835	0.118182	0.959933	0.0787	0.943333	0.848	0.8	0.770582	0.944958	0.960308	0.935491	0.998653	0.989757	0.993824	0.965006	0.256051	0.988	0.995	1	0.632308	0.839727	0.782914
Gabon	50.8	80	14	16.8	97.692	100	47	12	4.9	68.3811	37.1141	141.993	53.3036	1.03805	0.97151	0.87698	0.58561	2.66617	9.4	1.03	89.4942	35.5	41.356	0.01	81.0462	0.758095	0.8	0.65	0.694545	0.555945	0	0.843333	0.76	0.183333	0.667169	0.606963	0.688938	0.716992	0.974633	0.9593	0.927635	0.935753	0.111086	0.906	0.95	0.894942	0.453846	0.931073	0.99
Gambia	68.9	97	10.2	0.1	112.463	100	71	5.4	2.3	68.7376	37.9536	91.5563	57.4518	1.04938	1.06557	0.94973	0.68085	2.76771	9.4	1.03	47.2105	10.6	110.211	0.95	48.0581	0.671905	0.97	0.745	0.998182	0.488803	0	0.763333	0.892	0.616667	0.670922	0.61221	0.937454	0.742132	0.96708	0.906329	0.970429	0.950519	0.116293	0.906	0.95	0.472105	0.836923	0.816315	0.05
Georgia	11.9	94	6.5	16.2	38.3292	100	292	2.9	2	20.9357	59.453	116.785	103.682	1.24096	1.02368	1.00239	1.21904	1.98331	2.7	1.106	100	34.1	41.446	0.770028	31.893	0.943333	0.94	0.8375	0.705455	0.825776	0	0.0266667	0.942	0.666667	0.167744	0.746581	0.875669	0.977687	0.83936	0.966171	0.998594	0.96604	0.0760672	0.973	0.86	1	0.475385	0.930923	0.229972
Germany	3.7	96	6.9	50.6	6.4276	99.93	33	7.7	0.7	76.9871	111.153	104.97	102.665	0.99284	0.99475	0.94383	0.95823	4.95219	0.9	1.058	100	7.6	71.151	0.17373	13.3789	0.982381	0.96	0.8275	0.08	0.970784	0.0007	0.89	0.846	0.883333	0.757759	0.930294	0.963189	0.983846	0.995227	0.9925	0.966959	0.993524	0.228317	0.991	0.98	1	0.883077	0.881415	0.82627
Ghana	61.6	88	10.7	3.3	66.1256	100	81	3.4	0.4	59.8457	120.789	109.925	61.4125	1.0267	1.00008	0.94872	0.69184	6.17855	1.7	1.053	78.3	3.3	71.5	0.0106946	45.2182	0.706667	0.88	0.7325	0.94	0.699429	0	0.73	0.932	0.933333	0.577323	0.870069	0.926479	0.766136	0.9822	0.999886	0.969835	0.952223	0.291208	0.983	0.9925	0.783	0.949231	0.880833	0.989305
Greece	4.6	99	9.8	24.5	7.2346	100	45	3	1.35	61.6635	76.2007	98.6008	108.198	0.98498	0.98663	0.95987	1.00064	3.96878	0.1	1.065	100	53.9	179.354	0.69	16.0858	0.978095	0.99	0.755	0.554545	0.967115	0	0.85	0.94	0.775	0.596458	0.851254	0.989636	0.950316	0.989987	0.9809	0.976394	0.999901	0.177886	0.999	0.9625	1	0.170769	0.701077	0.31
Guatemala	29.1	74	11.4	5.9	80.088	100	43	12.8	5.2	37.6429	44.6592	101.791	65.6267	1.00737	0.9614	0.93318	1.16769	2.95595	31.2	1.05	85.4944	5.4	24.196	0.01	59.9032	0.861429	0.74	0.715	0.892727	0.635964	0	0.856667	0.744	0.133333	0.34361	0.65412	0.98673	0.791677	0.995087	0.944857	0.960694	0.974002	0.125946	0.688	1	0.854944	0.916923	0.959673	0.99
Guyana	39.4	95	14.3	17.9	87.5772	98.63	43	29.7	1.3	59.4477	94.3375	85.4384	89.3368	0.97851	0.96548	0.99208	2.03288	3.19216	20.4	1.05	86.9	23.8	47.901	0.02	24.0152	0.812381	0.95	0.6425	0.674545	0.601922	0.0137	0.856667	0.406	0.783333	0.573134	0.964609	0.892136	0.935375	0.985673	0.950686	0.995341	0.839864	0.138059	0.796	1	0.869	0.633846	0.920165	0.98
Honduras	20.4	85	9.9	7.1	64.2684	100	53	7.3	3.7	50.6477	45.9574	110.714	70.7756	1.03945	0.98971	1.18881	1.35425	5.86775	74.6	1.05	88.6538	6.9	46.173	0.01	54.0409	0.902857	0.85	0.7525	0.870909	0.707871	0	0.823333	0.854	0.383333	0.480502	0.662234	0.920639	0.822882	0.9737	0.9853	0.888935	0.945078	0.275269	0.254	1	0.886538	0.893846	0.923045	0.99
Hungary	5.9	99	8.6	23.9	17.7074	100	123	10.9	2.4	65.9806	79.3627	101.616	105.204	0.97256	0.99395	1.00185	1.25192	4.65935	1.5	1.06	100	21	74.69	0.18	10.3606	0.971905	0.99	0.785	0.565455	0.919512	0	0.59	0.782	0.6	0.641901	0.871017	0.988029	0.968462	0.981707	0.991357	0.998912	0.960943	0.2133	0.985	0.975	1	0.676923	0.875517	0.82
Iceland	2	92	4.2	46.2	5.653	0	6.4	8.2	1.4	81.0427	97.4752	98.6671	111.17	0.98299	1.00389	0.99298	1.72397	7.80585	0.3	1.054	100	10.9	68.05	0.0100212	76.4229	0.990476	0.92	0.895	0.16	0.974305	1	0.978667	0.836	0.766667	0.800449	0.98422	0.990126	0.932301	0.98866	0.994443	0.995871	0.887757	0.374659	0.997	0.99	1	0.832308	0.886583	0.989979
India	47.7	87	28	1.6	23.2924	99.99	130	35.5	1.6	30.0365	12.2066	108.601	73.9692	0.93747	1.11917	1.01242	0.98992	3.84236	3.2	1.108	79.1693	10.4	69.551	0.741913	36.5362	0.772857	0.87	0.3	0.970909	0.894125	0.0001	0.566667	0.29	0.733333	0.263542	0.451291	0.936292	0.842238	0.958313	0.829757	0.992694	0.998437	0.171403	0.968	0.855	0.791693	0.84	0.884082	0.258087
Indonesia	27.2	81	9	0	49.249	88.91	84	3.6	0.9	37.7797	58.156	105.853	85.8421	1.03316	0.97321	1.00378	1.1243	3.59181	0.5	1.05	97.01	21.8	26.871	0.167093	38.0661	0.870476	0.81	0.775	1	0.776141	0.1109	0.72	0.928	0.85	0.34505	0.738475	0.956646	0.914194	0.977893	0.961729	0.997776	0.980729	0.158554	0.995	1	0.9701	0.664615	0.955215	0.832907
Iran (Islamic Republic of)	15.5	98	7.7	0	26.3422	100	35	7.8	1.9	41.2014	50.7819	108.916	89.1672	0.97673	1.05095	0.99426	0.89144	2.92899	4.8	1.05	99.4417	29.4	42.409	0.949187	0.937924	0.92619	0.98	0.8075	1	0.880263	0	0.883333	0.844	0.683333	0.381067	0.692387	0.933955	0.934347	0.984487	0.927214	0.996624	0.983169	0.124564	0.952	1	0.994417	0.547692	0.929318	0.0508128
Ireland	3.6	95	5.2	31.3	10.0948	31.25	17	14.5	1.8	66.0588	96.7952	101.428	127.482	1.03972	1.01072	1.03004	1.09339	5.32457	1.1	1.07	100	25.8	78.706	0.0990851	8.47172	0.982857	0.95	0.87	0.430909	0.954115	0.6875	0.943333	0.71	0.7	0.642724	0.97997	0.989422	0.833443	0.97352	0.984686	0.982329	0.985521	0.247414	0.989	0.95	1	0.603077	0.868823	0.900915
Israel	4	94	8	15.1	9.3078	100	16	4.7	1.66	60.8544	111.104	104.776	102.479	0.99902	1.00662	1.01004	1.3829	5.75727	1.7	1.053	100	11	64.082	0.971121	9.34268	0.980952	0.94	0.8	0.725455	0.957692	0	0.946667	0.906	0.723333	0.587941	0.930603	0.964619	0.984977	0.999347	0.990543	0.994094	0.940636	0.269604	0.983	0.9925	1	0.830769	0.893197	0.0288793
Italy	3.5	93	7.3	20.3	5.9352	100	35	3.4	1.2	75.6132	98.661	101.037	102.902	0.97529	0.99224	0.97727	1.35718	4.07985	0.8	1.063	100	44.1	132.042	0.639387	17.0904	0.983333	0.93	0.8175	0.630909	0.973022	0	0.883333	0.932	0.8	0.743297	0.991631	0.992316	0.982409	0.983527	0.988914	0.986629	0.944623	0.183582	0.992	0.9675	1	0.321538	0.77993	0.360613
Jamaica	15.7	91	11.3	6.9	58.7846	100	43	1.2	1.1	52.3839	99.4672	97.2451	82.1073	1.06557	1.00341	1.07427	1.72571	5.46196	36.1	1.05	97.0974	30.5	120.205	0.38657	15.9884	0.925238	0.91	0.7175	0.874545	0.732797	0	0.856667	0.976	0.816667	0.498778	0.99667	0.979594	0.89156	0.956287	0.995129	0.956312	0.887487	0.254459	0.639	1	0.970974	0.530769	0.799658	0.61343
Japan	2.7	96	9.6	16.8	3.9706	98.42	24	18.4	1.4	83.5888	89.9269	101.575	101.92	1.01929	0.99827	1.00401	0.9262	3.59184	0.3	1.056	100	6.5	237.968	0.48	5.52698	0.987143	0.96	0.76	0.694545	0.981952	0.0158	0.92	0.632	0.766667	0.82725	0.937043	0.988332	0.988364	0.98714	0.997529	0.997641	0.988558	0.158556	0.997	0.985	1	0.9	0.603387	0.52
Jordan	17.9	99	13	0	22.6438	100	22	2.2	1.1	69.678	32.1971	88.719	84.2943	0.96062	0.98779	1.05058	1.1123	4.94514	2.3	1.054	100	28.8	93.391	1	3.1305	0.914762	0.99	0.675	1	0.897074	0	0.926667	0.956	0.816667	0.680822	0.576232	0.916437	0.904814	0.973747	0.982557	0.970247	0.982589	0.227956	0.977	0.99	1	0.556923	0.844348	0
Kazakhstan	14.1	98	6.1	23.4	27.191	89.14	93	30.8	2.1	54.3603	59.5759	110.564	109.108	1.11074	1.00113	1.03462	1.2774	2.7875	7.4	1.065	100	3.5	21.882	0.95	1.3626	0.932857	0.98	0.8475	0.574545	0.876405	0.1086	0.69	0.384	0.65	0.519582	0.747349	0.921751	0.944799	0.926173	0.998386	0.979635	0.956992	0.117308	0.926	0.9625	1	0.946154	0.96353	0.05
Kenya	49.4	89	8	3.3	90.219	98.93	57	16.2	0.6	61.2533	76.2238	108.974	67.6404	0.98489	0.99473	0.92981	0.70288	5.27392	5.9	1.03	36	17.4	52.422	0.71	75.5182	0.764762	0.89	0.8	0.94	0.589914	0.0107	0.81	0.676	0.9	0.59214	0.851399	0.933526	0.803881	0.989927	0.992471	0.958712	0.953935	0.244816	0.941	0.95	0.36	0.732308	0.91263	0.29
Kuwait	8.6	99	8.3	0	9.4458	100	14	1.4	2.6	85.9338	80.9874	102.684	94.9727	0.98607	1.00651	1.16453	1.61945	3.76001	1.8	1.042	100	19.4	11.174	1	0	0.959048	0.99	0.7925	1	0.957065	0	0.953333	0.972	0.566667	0.851935	0.881171	0.980122	0.969531	0.990713	0.9907	0.903218	0.903961	0.16718	0.982	0.98	1	0.701538	0.981377	0
Kyrgyzstan	21.3	97	6.3	18.3	39.1966	98.93	100	11.6	3.1	56.1316	27.5879	107.359	92.0505	1.00354	0.98964	1.01525	1.30631	5.52738	3.7	1.058	99.8	14.7	64.894	1	28.2504	0.898571	0.97	0.8425	0.667273	0.821834	0.0107	0.666667	0.768	0.483333	0.538227	0.547424	0.945492	0.951821	0.99764	0.9852	0.991029	0.95251	0.257814	0.963	0.98	0.998	0.773846	0.891843	0
Lao People's Democratic Republic	66.7	89	14.8	11.8	63.734	100	108	6.9	2.1	50.5339	35.3494	111.346	61.6972	1.04264	0.9604	0.92518	0.95647	3.32011	7.3	1.05	78.0885	3.4	65.555	0.02	90.3435	0.682381	0.89	0.63	0.785455	0.7103	0	0.64	0.862	0.65	0.479305	0.595934	0.915957	0.767862	0.971573	0.943429	0.955988	0.993251	0.144621	0.927	1	0.780885	0.947692	0.890742	0.98
Latvia	7.9	95	4.6	13.4	13.287	100	115	13.8	3.4	63.1768	88.1929	99.6652	119.492	0.98862	0.99059	0.99358	1.42805	5.28524	3.9	1.053	100	19.3	34.837	0.02	40.2361	0.962381	0.95	0.885	0.756364	0.939605	0	0.616667	0.724	0.433333	0.612387	0.926205	0.99752	0.881864	0.992413	0.986557	0.996224	0.933636	0.245397	0.961	0.9925	1	0.703077	0.941938	0.98
Lebanon	8.3	81	11.5	0.6	12.1846	100	30	0.6	3.4	47.6081	77.596	92.4138	61.2058	0.94192	0.91439	0.9918	1.15689	2.57119	4.3	1.05	100	20.7	138.425	0.67	3.20354	0.960476	0.81	0.7125	0.989091	0.944615	0	0.9	0.988	0.433333	0.448507	0.859975	0.943806	0.764883	0.96128	0.8777	0.995176	0.975676	0.106215	0.957	1	1	0.681538	0.769292	0.33
Lesotho	90.2	93	10.7	3.5	93.1736	100	75	8.3	0.4	76.1199	33.9522	105.52	53.7722	1.03817	0.9725	1.35846	1.45339	11.3611	38	1.03	27.8	33	49.548	0.96	51.8158	0.570476	0.93	0.7325	0.936364	0.576484	0	0.75	0.834	0.933333	0.748631	0.587201	0.959109	0.719831	0.974553	0.960714	0.789141	0.929707	0.556982	0.62	0.95	0.278	0.492308	0.91742	0.04
Liberia	69.9	52	14	3.5	107.121	2.82	70	3.7	0.4	31.4781	156.063	93.9163	37.2998	0.96457	0.90409	0.77618	0.63143	2.75756	3.2	1.054	9.14063	4.6	39.512	0.01	89.8193	0.667143	0.52	0.65	0.936364	0.513088	0.9718	0.766667	0.926	0.933333	0.278716	0.649604	0.954936	0.619999	0.97638	0.862986	0.868341	0.942857	0.115772	0.968	0.99	0.0914063	0.929231	0.934147	0.99
Lithuania	5.2	93	4.8	20.4	10.3996	100	73	26.8	3.7	67.8695	91.3104	103.439	108.26	0.98303	1.00436	0.96064	1.46904	4.6125	5.5	1.052	100	21.5	42.544	0.02	28.0722	0.975238	0.93	0.88	0.629091	0.952729	0	0.756667	0.464	0.383333	0.661784	0.94569	0.974525	0.949942	0.988687	0.993771	0.976847	0.927281	0.210897	0.945	0.995	1	0.669231	0.929093	0.98
Luxembourg	1.9	99	7.1	29.3	5.7284	100	20	6.1	3	83.9283	93.4853	96.5436	102.416	1.00355	1.00636	1.02604	1.13516	4.08388	0.7	1.046	100	16	22.091	0.25	6.96629	0.990952	0.99	0.8225	0.467273	0.973962	0	0.933333	0.878	0.5	0.830824	0.959283	0.974397	0.98536	0.997633	0.990914	0.984682	0.979045	0.183789	0.993	0.99	1	0.753846	0.963182	0.75
Madagascar	49.6	69	16	3.1	114.82	98.74	84	10.6	3.1	48.446	18.0611	148.894	38.4349	1.07631	0.99971	0.98072	0.93728	2.08204	0.6	1.03	16.819	5.2	35.533	0.04	73.5642	0.76381	0.69	0.6	0.943636	0.478091	0.0126	0.72	0.788	0.483333	0.457326	0.487882	0.637819	0.626878	0.949127	0.999586	0.988659	0.990276	0.0811303	0.994	0.95	0.16819	0.92	0.940778	0.96
Malawi	64	88	13.5	3.2	135.349	99.58	72	10.5	0.7	52.7214	81.6118	145.466	43.3952	1.0087	1.02083	0.89625	0.63629	5.60799	1.8	1.03	11.9	13.8	61.066	0.01	80.5785	0.695238	0.88	0.6625	0.941818	0.384777	0.0042	0.76	0.79	0.883333	0.502331	0.885074	0.663217	0.656941	0.9942	0.970243	0.938971	0.943611	0.261948	0.982	0.95	0.119	0.787692	0.898223	0.99
Malaysia	7	99	11.1	10.2	13.7166	86.85	22	2.3	1.1	55.175	93.9488	101.792	77.5713	1.0348	1.00169	1.08086	1.52705	4.96636	1.9	1.06	100	6.7	57.946	0.03	4.76977	0.966667	0.99	0.7225	0.814545	0.937652	0.1315	0.926667	0.954	0.816667	0.528158	0.96218	0.986726	0.864068	0.9768	0.997586	0.952435	0.918287	0.229044	0.981	0.975	1	0.896923	0.903423	0.97
Mali	114.7	68	18	0.1	173.741	100	116	4.3	2.2	22.8524	4.05597	75.7904	41.3075	1.0599	0.90914	0.80848	0.4257	3.73929	10.2	1.05	27.2931	10.5	30.914	0.99	83.5613	0.45381	0.68	0.55	0.998182	0.210267	0	0.613333	0.914	0.633333	0.18792	0.40035	0.820669	0.644288	0.960067	0.8702	0.887341	0.910961	0.166117	0.898	1	0.272931	0.838462	0.948477	0.01
Malta	6.4	97	7	32.2	16.3804	100	31	4	1.4	69.164	111.169	103.414	94.8016	1.03988	1.02471	1.06975	1.37038	7.849	1.4	1.06	100	13.6	60.608	1	3.95217	0.969524	0.97	0.825	0.414545	0.925544	0	0.896667	0.92	0.766667	0.67541	0.930195	0.974708	0.968495	0.973413	0.9647	0.958971	0.942577	0.376872	0.986	0.975	1	0.790769	0.898987	0
Mauritania	84.7	73	34.7	0.1	77.9034	100	64	2.4	2	49.5936	10.6046	102.452	30.5981	1.26166	1.0501	0.92944	0.50317	2.93012	11.4	1.05	38.8	46.6	98.363	1	32.5798	0.596667	0.73	0.1325	0.998182	0.645894	0	0.786667	0.952	0.666667	0.469406	0.441279	0.981836	0.579382	0.82556	0.928429	0.958494	0.922972	0.124622	0.886	1	0.388	0.283077	0.836062	0
Mauritius	13.5	97	14	3.9	28.3166	100	21	10.7	4.9	49.1665	103.861	103.036	95.6962	1.0244	1.01745	1.04655	1.31428	4.88539	2.7	1.042	99.1662	21.2	62.299	0.03	10.6401	0.935714	0.97	0.65	0.929091	0.871288	0	0.93	0.786	0.183333	0.464911	0.975869	0.977508	0.973916	0.983733	0.975071	0.972618	0.951274	0.224892	0.973	0.98	0.991662	0.673846	0.896168	0.97
Mexico	13.2	87	9.15	12	62.2038	99.96	24	6	1.1	51.7683	68.9583	103.389	90.5497	1.02346	0.99555	1.06543	1.00589	5.31348	15.7	1.05	99.1729	9.9	53.729	0.776238	9.7989	0.937143	0.87	0.77125	0.781818	0.717255	0.0004	0.92	0.88	0.816667	0.492298	0.805989	0.974895	0.942725	0.98436	0.993643	0.961512	0.999087	0.246845	0.843	1	0.991729	0.847692	0.910452	0.223762
Morocco	27.6	99	15	0	31.3652	100	29	5.9	2.5	33.8761	56.8693	114.706	69.063	0.80794	0.94774	0.85419	0.95755	5.26064	1	1.06	91.6	20.2	64.059	0.988701	11.778	0.868571	0.99	0.625	1	0.857431	0	0.903333	0.882	0.583333	0.303959	0.730433	0.891066	0.812503	0.87196	0.925343	0.914229	0.993419	0.244135	0.99	0.975	0.916	0.689231	0.893235	0.0112991
Namibia	45.4	92	16	4.4	76.2126	96.43	48	2.6	1.2	59.9992	21.4395	111.428	64.8426	1.03565	0.96669	1.15734	1.27635	8.34961	16.9	1.03	49.5638	38.7	39.942	0.995383	27.6175	0.78381	0.92	0.6	0.92	0.653579	0.0357	0.84	0.948	0.8	0.578939	0.508997	0.915347	0.786925	0.976233	0.952414	0.907447	0.957155	0.402544	0.831	0.95	0.495638	0.404615	0.93343	0.00461716
Nepal	35.8	91	17.8	0.2	71.2882	99.98	104	25.8	2.3	40.3265	84.2138	135.434	67.1698	0.97021	1.08196	1.07293	1.01932	3.71216	2.9	1.065	84.9	4	25.157	0.946855	84.3768	0.829524	0.91	0.555	0.996364	0.675963	0.0002	0.653333	0.484	0.616667	0.371858	0.901336	0.73753	0.801029	0.98014	0.882914	0.9571	0.997005	0.164726	0.971	0.9625	0.849	0.938462	0.958072	0.0531453
Netherlands	3.8	95	6.3	50.2	3.8842	100	24	6.7	0.8	87.0045	95.6301	104.702	135.474	1.02105	0.99468	1.01196	1.10479	5.52938	0.7	1.055	100	11.1	65.119	0.74	5.66845	0.981905	0.95	0.8425	0.0872727	0.982345	0	0.92	0.866	0.866667	0.863205	0.972688	0.965172	0.785007	0.985967	0.9924	0.992965	0.983753	0.257917	0.993	0.9875	1	0.829231	0.891468	0.26
New Zealand	5.7	92	5.7	17.8	23.2522	0	0.5	13	1.1	82.3479	93.1843	99.3609	116.592	1.0019	0.99558	1.05733	1.35091	6.36889	0.9	1.055	100	14.6	29.557	0.361516	30.8648	0.972857	0.92	0.8575	0.676364	0.894308	1	0.998333	0.74	0.816667	0.814189	0.957402	0.995266	0.899445	0.998733	0.993686	0.966276	0.945595	0.300969	0.991	0.9875	1	0.775385	0.950738	0.638484
Nicaragua	22.1	98	7.6	24.9	88.0554	100	62	13.4	1.5	56.3686	58.3219	123.259	74.1883	1.03113	0.99163	1.12814	1.11059	4.48549	11.5	1.05	81.8531	7.6	29.359	0.0100195	51.8423	0.894762	0.98	0.81	0.547273	0.599748	0	0.793333	0.732	0.75	0.540722	0.739512	0.82771	0.843566	0.979247	0.988043	0.924624	0.982854	0.204384	0.885	1	0.818531	0.883077	0.951068	0.989981
Niger	95.5	65	27	0.2	201.163	100	110	2.6	1.3	55.2195	7.3655	72.4994	20.7498	1.06223	0.85631	0.71129	0.3442	6.70941	4.5	1.05	14.3096	7.1	41.303	1	78.1317	0.545238	0.65	0.325	0.996364	0.0856227	0	0.633333	0.948	0.783333	0.528627	0.421034	0.796291	0.519696	0.958513	0.794729	0.830171	0.898326	0.318431	0.955	1	0.143096	0.890769	0.931162	0
Norway	2.6	95	5.2	21.4	5.8552	100	13	10.2	1.7	85.4924	97.4923	100.421	112.989	1.00498	0.99753	0.96843	1.45779	7.37329	0.6	1.058	100	8.4	33.203	0.233687	57.0886	0.987619	0.95	0.87	0.610909	0.973385	0	0.956667	0.796	0.716667	0.847288	0.984327	0.996882	0.921277	0.99668	0.996471	0.981429	0.929025	0.352476	0.994	0.98	1	0.870769	0.944662	0.766313
Oman	11.6	99	10	0	7.5474	100	13	1.3	1.3	89.766	55.5543	109.281	104.233	1.02816	1.03478	1.06818	1.36845	4.96038	1.1	1.05	100	18.8	15.265	1	0	0.944762	0.99	0.75	1	0.965694	0	0.956667	0.974	0.783333	0.892273	0.722215	0.931252	0.974344	0.981227	0.950314	0.959894	0.942876	0.228737	0.989	1	1	0.710769	0.974558	0
Pakistan	81.1	72	32	0	38.322	100	89	9.1	1.38	35.1508	72.3195	92.7095	44.5259	0.87324	0.85464	0.79272	0.87235	2.64674	7.8	1.087	97.5348	8.6	63.568	0.967522	47.2056	0.61381	0.72	0.2	1	0.825809	0	0.703333	0.818	0.77	0.317376	0.826997	0.945997	0.663793	0.915493	0.792343	0.878071	0.980209	0.110089	0.922	0.9075	0.975348	0.867692	0.894053	0.0324779
Panama	17	73	8.3	22.6	73.7318	90.61	25	5.8	3.6	73.2441	71.493	105.326	75.4985	1.01512	0.9709	1.06322	1.49243	3.18772	17.4	1.05	91.597	11	38.771	0.01	19.7708	0.919048	0.73	0.7925	0.589091	0.664855	0.0939	0.916667	0.884	0.4	0.718359	0.821831	0.96055	0.851506	0.98992	0.958429	0.962812	0.923654	0.137832	0.826	1	0.91597	0.830769	0.935382	0.99
Paraguay	20.5	93	6.3	19.5	56.8552	99.97	57	6.3	2.8	45.8737	37.7146	105.986	76.5735	1.00358	0.96874	1.06561	1.41578	4.9554	8.8	1.05	99.0007	9.3	23.987	0.01	63.1169	0.902381	0.93	0.8425	0.645455	0.741567	0.0003	0.81	0.874	0.533333	0.43025	0.610716	0.955658	0.858021	0.997613	0.955343	0.961406	0.935538	0.228482	0.912	1	0.990007	0.856923	0.960022	0.99
Peru	16.9	90	6.9	13	48.4478	99.99	33	4.9	3.7	60.6382	88.7042	101.695	95.7445	1.0124	1.00009	1.00057	1.10141	3.97865	6.7	1.05	92.92	9.2	24.036	0.73301	25.6357	0.919524	0.9	0.8275	0.763636	0.779783	0.0001	0.89	0.902	0.383333	0.585666	0.929401	0.987443	0.974209	0.991733	0.999871	0.999665	0.984278	0.178392	0.933	1	0.9292	0.858462	0.95994	0.26699
Philippines	28	60	21	11.2	62.6538	100	83	4.3	3.3	34.2822	54.418	116.819	88.3889	1.04399	1.00061	1.09835	1.28163	2.65168	9.9	1.06	89.1258	16.4	36.28	0.0230107	28.7213	0.866667	0.6	0.475	0.796364	0.71521	0	0.723333	0.914	0.45	0.308233	0.715113	0.875416	0.92963	0.970673	0.999129	0.942147	0.956336	0.110343	0.901	0.975	0.891258	0.747692	0.939533	0.976989
Poland	5.2	98	5.7	21.7	13.135	100	69	12.7	3.2	70.9837	77.3242	101.311	108.703	0.99467	1.00214	0.96486	1.52178	4.91175	0.7	1.06	100	24	51.14	0.0375701	11.5474	0.975238	0.98	0.8575	0.605455	0.940295	0	0.77	0.746	0.466667	0.694565	0.858276	0.990292	0.947257	0.996447	0.996943	0.979329	0.919104	0.226244	0.993	0.975	1	0.630769	0.914767	0.96243
Portugal	3.6	98	8.5	29.2	9.4496	24.22	17	3.8	1.48	64.8157	93.7019	107.37	119.135	0.98403	0.96243	0.96935	1.13218	5.12559	0.9	1.06	100	36.8	128.988	0.545506	30.4988	0.982857	0.98	0.7875	0.469091	0.957047	0.7578	0.943333	0.924	0.753333	0.629639	0.960637	0.945408	0.884029	0.989353	0.946329	0.981971	0.979507	0.23721	0.991	0.975	1	0.433846	0.78502	0.454494
Qatar	8	99	7.6	1.5	10.4832	100	9	4.6	1	85.7493	58.7834	102.998	91.1725	1.02536	1.01135	1.26389	6.94495	3.60719	7.2	1.046	100	1.3	34.925	1	0	0.961905	0.99	0.81	0.972727	0.952349	0	0.97	0.908	0.833333	0.849993	0.742396	0.977795	0.9465	0.983093	0.983786	0.844771	0.0783023	0.159343	0.928	0.99	1	0.98	0.941792	0
Republic of Korea	3.4	98	4.4	18.2	1.5886	100	24	18.2	1.8	54.0511	93.5822	99.0091	98.8821	0.99845	0.99374	0.99022	0.7654	5.05211	0.7	1.07	100	10.4	37.755	0.422919	2.8381	0.98381	0.98	0.89	0.669091	0.992779	0	0.92	0.636	0.7	0.516327	0.959889	0.99266	0.993225	0.998967	0.991057	0.994247	0.963628	0.233442	0.993	0.95	1	0.84	0.937075	0.577081
Republic of Moldova	15.8	87	5.8	22.4	22.028	100	115	10.1	3.5	51.377	83.8985	92.4128	86.1081	0.9891	0.98993	1.00808	1.3415	7.46784	3.2	1.061	100	8.5	38.527	0.454848	13.0473	0.924762	0.87	0.855	0.592727	0.899873	0	0.616667	0.798	0.416667	0.488179	0.899366	0.943798	0.915807	0.992733	0.985614	0.995247	0.947054	0.357325	0.968	0.9725	1	0.869231	0.935788	0.545152
Romania	11.1	89	8.4	37.7	34.034	100	138	7.8	2.1	80.4038	90.9845	89.7831	92.2522	1.00105	0.98357	0.99415	1.23241	3.12918	1.5	1.058	100	25.1	39.4	0.206623	24.3415	0.947143	0.89	0.79	0.314545	0.8453	0	0.54	0.844	0.65	0.793724	0.943653	0.924319	0.953044	0.9993	0.976529	0.996559	0.963967	0.13483	0.985	0.98	1	0.613846	0.934333	0.793377
Russian Federation	9.6	97	6.1	29.8	22.7328	89.66	110	27.3	2.5	52.2024	86.9682	100.521	104.483	0.98246	1.00775	0.97951	1.21165	3.86133	9.5	1.06	100	12.9	15.944	0.0824475	3.45593	0.954286	0.97	0.8475	0.458182	0.896669	0.1034	0.633333	0.454	0.583333	0.496867	0.918551	0.99614	0.97283	0.988307	0.988929	0.987947	0.967186	0.172376	0.905	0.975	1	0.801538	0.973427	0.917552
Rwanda	41.7	98	7.1	4.1	25.6248	100	68	11.1	0.3	38.0984	17.9828	132.55	36.687	1.03868	1.0129	1.08584	0.77581	3.79746	4.9	1.017	19.8	0.7	33.423	0.01	88.4469	0.801429	0.98	0.8225	0.925455	0.883524	0	0.773333	0.778	0.95	0.348404	0.487393	0.758888	0.616285	0.974213	0.981571	0.949506	0.965242	0.169101	0.951	0.9175	0.198	0.989231	0.944295	0.99
Saudi Arabia	14.5	98	8.8	0	8.406	100	28	0.6	2.8	74.5245	17.35	109.478	108.288	1.05406	1.02989	0.76473	0.9598	5.13581	6.2	1.03	100	29.5	4.963	1	0.00600874	0.930952	0.98	0.78	1	0.961791	0	0.906667	0.988	0.533333	0.731837	0.483438	0.929792	0.94977	0.96396	0.9573	0.861606	0.993767	0.237734	0.938	0.95	1	0.546154	0.991728	0
Senegal	47.2	89	18.6	0.1	76.8768	100	43	4.3	0.6	51.8322	14.9042	82.1719	49.6468	1.1237	1.11935	0.97841	0.6047	7.3962	7.9	1.036	61	13	56.916	0.927587	43.2972	0.775238	0.89	0.535	0.998182	0.65056	0	0.856667	0.914	0.9	0.49297	0.468151	0.86794	0.694829	0.917533	0.8295	0.9873	0.938713	0.353651	0.921	0.965	0.61	0.8	0.90514	0.0724135
Serbia	6.7	95	6.1	26.8	18.6946	100	137	5.7	5.35	61.8827	58.1715	101.343	96.6696	0.98765	0.99775	1.0144	1.33328	4.17861	1.3	1.052	100	49.5	76.016	0.176038	23.4293	0.968095	0.95	0.8475	0.512727	0.915025	0	0.543333	0.886	0.108333	0.598766	0.738572	0.990052	0.979816	0.991767	0.996786	0.991529	0.948329	0.188647	0.987	0.995	1	0.238462	0.873307	0.823962
Sierra Leone	120.4	86	10.5	4.1	116.732	99.97	142	10.7	1.3	16.9866	10.1647	127.599	43.2503	1.11062	1.00987	0.86252	0.39976	2.66167	1.9	1.018	13.097	4.9	42.37	0.0149795	73.0543	0.426667	0.86	0.7375	0.925455	0.469398	0.0003	0.526667	0.786	0.783333	0.126175	0.438529	0.795563	0.656062	0.926253	0.9859	0.919129	0.90694	0.110855	0.981	0.92	0.13097	0.924615	0.929383	0.985021
Slovakia	7.3	96	7.9	25.9	19.9398	100	66	7.6	4.3	72.5051	93.6392	99.7321	92.4665	0.97968	0.98831	1.0077	1.54596	4.23856	1.1	1.05	100	31.1	52.495	0.176941	12.1411	0.965238	0.96	0.8025	0.529091	0.909365	0	0.78	0.848	0.283333	0.710581	0.960245	0.998015	0.954343	0.986453	0.9833	0.995471	0.915355	0.191721	0.989	1	1	0.521538	0.912508	0.823059
Slovenia	2.6	95	6	28.9	3.6332	100	42	8.4	1.8	71.7338	93.4189	99.3036	110.671	0.97455	1.0014	0.99759	1.4442	5.48659	0.7	1.054	100	20.8	83.149	0.17382	22.6779	0.987619	0.95	0.85	0.474545	0.983485	0	0.86	0.832	0.7	0.702462	0.958868	0.994841	0.935329	0.983033	0.998	0.998582	0.931132	0.255723	0.993	0.99	1	0.68	0.861418	0.82618
South Africa	40.5	69	15.1	4.9	44.4402	99.87	44	2.8	1.05	48.2355	76.1702	64.1399	93.8091	1.02082	0.95216	1.21715	1.48451	6.02955	33	1.03	86	52.6	49.778	0.833958	16.5872	0.807143	0.69	0.6225	0.910909	0.797999	0.0013	0.853333	0.944	0.825	0.45511	0.851064	0.73437	0.962479	0.98612	0.931657	0.872265	0.924882	0.283567	0.67	0.95	0.86	0.190769	0.917037	0.166042
Spain	4.1	97	8.2	28.4	8.311	28.11	15	3	1.1	70.8757	96.6599	101.677	129.81	0.99596	1.01134	0.99736	1.17774	4.27093	0.7	1.064	100	57.9	99.772	0.720276	17.3517	0.980476	0.97	0.795	0.483636	0.962223	0.7189	0.95	0.94	0.816667	0.693428	0.979124	0.98758	0.81933	0.997307	0.9838	0.998447	0.972443	0.193381	0.993	0.965	1	0.109231	0.833713	0.279724
Sri Lanka	9.8	99	17	0.2	14.153	100	119	23.7	0.9	56.0593	93.0398	101.27	99.7245	0.99113	0.97931	1.0459	1.53942	2.17912	2.9	1.043	92.1912	19.1	76.036	0.453587	57.5852	0.953333	0.99	0.575	0.996364	0.935668	0	0.603333	0.526	0.85	0.537466	0.956499	0.990589	0.99833	0.994087	0.970443	0.973	0.916369	0.0861087	0.971	0.9825	0.921912	0.706154	0.873273	0.546413
Sudan	70.1	93	30.7	0.5	72.05	100	64	15	0.5	21.3834	34.2669	70.4018	42.6985	1.34713	0.89996	0.94512	1.06319	2.21868	6.5	1.04	44.9	23.3	72.908	0.89	62.4168	0.66619	0.93	0.2325	0.990909	0.6725	0	0.786667	0.7	0.916667	0.172457	0.589168	0.780754	0.652718	0.76858	0.857086	0.967718	0.990203	0.0881374	0.935	0.975	0.449	0.641538	0.878487	0.11
Swaziland	60.7	90	8.7	4	67.2336	100	63	8.7	0.9	75.7129	25.3742	113.267	62.9931	1.02216	0.91605	0.9819	1.05455	7.04999	17.4	1.03	65	42.6	18.578	0.0630066	63.5508	0.710952	0.9	0.7825	0.927273	0.694393	0	0.79	0.826	0.85	0.744346	0.533589	0.901727	0.775716	0.985227	0.880071	0.989353	0.991543	0.335897	0.826	0.95	0.65	0.344615	0.969037	0.936993
Sweden	3	98	4.5	25.1	5.695	0	0.4	11.9	0.8	84.0304	93.9366	123.019	140.459	0.99926	1.04164	1.13502	1.52547	7.67509	0.9	1.06	100	22.8	42.926	0.154492	49.5375	0.985714	0.98	0.8875	0.543636	0.974114	1	0.998667	0.762	0.866667	0.831899	0.962104	0.829487	0.754795	0.999507	0.940514	0.920576	0.918532	0.367953	0.991	0.975	1	0.649231	0.928457	0.845508
Switzerland	3.9	97	6.7	29.4	2.8402	100	18	7.6	0.9	66	104.645	103.915	101.214	0.98595	0.99723	0.96993	1.02871	5.09608	0.5	1.052	100	8.7	45.802	0.35578	23.4522	0.981429	0.97	0.8325	0.465455	0.98709	0	0.94	0.848	0.85	0.642105	0.970966	0.970999	0.992643	0.990633	0.996043	0.982312	0.995549	0.235696	0.995	0.995	1	0.866154	0.923663	0.64422
Syrian Arab Republic	12.9	41	10.3	0	38.8766	100	31	0.4	2.3	46.3098	5.87931	80.1009	50.4892	0.96533	0.96692	1.00134	1.13739	5.13014	2.2	1.05	95.8432	30.1	30.024	0.93857	2.99268	0.938571	0.41	0.7425	1	0.823288	0	0.896667	0.992	0.616667	0.43484	0.411746	0.852599	0.699935	0.976887	0.952743	0.999212	0.978699	0.237443	0.978	1	0.958432	0.536923	0.94996	0.0614296
Tajikistan	44.8	96	10	16.4	37.7858	100	98	3.6	1.2	28.8301	11.0605	98.1896	87.8946	0.91208	1.00394	0.89888	0.66916	5.23215	1.4	1.05	99.9898	15.5	33.912	0.999899	40.7136	0.786667	0.96	0.75	0.701818	0.828246	0	0.673333	0.928	0.8	0.250843	0.444128	0.98659	0.926634	0.941387	0.994371	0.940518	0.948707	0.242674	0.986	1	0.999898	0.761538	0.94348	0.000101287
Thailand	12.3	99	11.3	0.2	44.6052	100	65	8.7	1.3	77.8335	69.1119	102.729	129.002	0.87097	0.93515	0.9448	1.41379	4.12887	3.9	1.062	100	3.9	42.691	0.05	23.586	0.941429	0.99	0.7175	0.996364	0.797249	0	0.783333	0.826	0.783333	0.766668	0.806949	0.979782	0.824232	0.91398	0.907357	0.967529	0.935847	0.186096	0.961	0.97	1	0.94	0.928848	0.95
The former Yugoslav Republic of Macedonia	5.5	91	5.5	20.2	17.2636	100	129	2.1	3.5	63.329	36.3517	93.2185	79.2941	0.99498	0.99229	0.97422	1.24823	3.29481	1.6	1.054	100	50.8	38.161	0.17	18.3018	0.97381	0.91	0.8625	0.632727	0.921529	0	0.57	0.958	0.416667	0.613989	0.602198	0.949767	0.87451	0.996653	0.988986	0.984835	0.961515	0.143324	0.984	0.99	1	0.218462	0.936398	0.83
Togo	78.4	88	11.1	3.2	92.0646	100	81	6.1	0.3	38.448	17.537	121.8	54.7086	1.02841	0.94721	0.52893	0.42694	5.2179	9.2	1.018	45.7	10.7	75.551	0.01	72.8253	0.626667	0.88	0.7225	0.941818	0.581525	0	0.73	0.878	0.95	0.352085	0.484606	0.838521	0.725507	0.98106	0.924586	0.7229	0.911153	0.241944	0.908	0.92	0.457	0.835385	0.874082	0.99
Trinidad and Tobago	20.4	96	11.9	25.4	30.8354	100	28	7.6	0.6	53.5062	82.9548	106.16	85.5115	0.99849	0.96618	1.07116	1.26465	3.1366	25.9	1.038	100	10.6	49.501	0.0100674	0.280935	0.902857	0.96	0.7025	0.538182	0.859839	0	0.906667	0.848	0.9	0.510591	0.893468	0.954368	0.912191	0.998993	0.951686	0.958141	0.958969	0.13521	0.741	0.97	1	0.836923	0.917498	0.989933
Tunisia	14	98	6.9	0	6.8052	100	44	2.7	1.3	56.6661	43.9468	114.174	88.2041	0.99963	0.97173	1.04599	1.65129	6.25036	3.1	1.05	99.8	31.8	57.188	0.937616	12.9241	0.933333	0.98	0.8275	1	0.969067	0	0.853333	0.946	0.783333	0.543854	0.649668	0.895004	0.928509	0.999753	0.959614	0.972947	0.899025	0.29489	0.969	1	0.998	0.510769	0.904687	0.0623836
Turkey	13.5	96	11	17.8	26.811	100	51	12.4	1.9	77.448	28.9258	102.49	102.489	0.94445	0.99345	0.96878	0.87392	4.76626	4.3	1.05	100	17.7	27.573	0.715401	11.5782	0.935714	0.96	0.725	0.676364	0.878132	0	0.83	0.752	0.683333	0.762611	0.555786	0.981558	0.984917	0.962967	0.990643	0.981635	0.980453	0.218783	0.957	1	1	0.727692	0.954045	0.284599
Turkmenistan	51.4	99	4.8	18.2	16.0482	100	73	25.7	2.6	65.2288	62.8544	89.3672	85.3414	0.97089	0.98404	0.96289	0.6364	3.0559	4.3	1.046	100	20.2	19.362	1	0.041262	0.755238	0.99	0.88	0.669091	0.927054	0	0.756667	0.486	0.566667	0.633987	0.76784	0.921239	0.91116	0.980593	0.9772	0.978171	0.943628	0.131072	0.957	0.99	1	0.689231	0.96773	0
Uganda	54.6	78	11.8	4.5	108.946	100	70	19.3	0.7	24.9407	11.6256	109.886	23.2365	1.03797	1.01875	0.90929	0.77639	2.21387	11.8	1.03	20.4	6.8	33.21	0.0116131	89.2155	0.74	0.78	0.705	0.918182	0.504793	0	0.766667	0.614	0.883333	0.209902	0.44766	0.926767	0.534767	0.974687	0.973214	0.946641	0.965332	0.0878908	0.882	0.95	0.204	0.895385	0.94465	0.988387
Ukraine	9	23	5.3	25.8	23.351	100	139	19.5	2.8	50.7984	94.142	103.915	99.2369	0.97449	1.02167	0.98022	1.15558	5.86354	4.4	1.062	100	16.9	79.331	0.462986	3.49772	0.957143	0.23	0.8675	0.530909	0.893859	0	0.536667	0.61	0.533333	0.482089	0.963387	0.971002	0.995375	0.982993	0.969043	0.988365	0.975879	0.275053	0.956	0.97	1	0.74	0.867782	0.537014
United Kingdom	4.2	96	7	40.5	13.9498	89.84	26	5.9	0.6	83.1427	91.147	108.24	127.811	0.99692	0.9971	1.04039	1.30744	5.68427	0.9	1.051	100	16.7	88.96	0.28069	7.29445	0.98	0.96	0.825	0.263636	0.936592	0.1016	0.913333	0.882	0.9	0.822555	0.944669	0.938961	0.831447	0.997947	0.995857	0.976241	0.952335	0.26586	0.991	0.9975	1	0.743077	0.851733	0.71931
United Republic of Tanzania	48.7	98	8.4	4	117.721	99.99	50	20.7	0.3	46.4141	31.7835	81.706	32.2561	1.02401	1.0305	0.91493	0.51125	3.47914	7.9	1.03	15.5014	5.5	36.944	0.2	86.6734	0.768095	0.98	0.79	0.927273	0.464906	0.0001	0.833333	0.586	0.95	0.435938	0.573647	0.864489	0.589431	0.983993	0.956429	0.949959	0.924225	0.152776	0.921	0.95	0.155014	0.915385	0.938427	0.8
United States	6.5	95	8.1	19.8	21.1538	8.64	12	12.7	1.19	48.2973	70.8391	100.147	97.5647	0.98093	0.99787	1.0183	1.36754	5.38078	3.9	1.049	100	14	105.607	0.55	8.91333	0.969048	0.95	0.7975	0.64	0.903846	0.9136	0.96	0.746	0.801667	0.455761	0.817744	0.998911	0.985241	0.987287	0.996957	0.989235	0.943017	0.250296	0.961	0.9975	1	0.784615	0.823988	0.45
Uruguay	10.1	95	8.1	15.1	55.7796	85.94	23	12.1	2.5	71.217	64.376	109.726	94.0633	1.0099	0.97417	1.12821	1.72616	4.35694	7.8	1.05	99.6571	19.1	64.3	0.01	55.4314	0.951905	0.95	0.7975	0.725455	0.746456	0.1406	0.923333	0.758	0.583333	0.697021	0.77735	0.927956	0.96402	0.9934	0.9631	0.924582	0.887417	0.197792	0.922	1	0.996571	0.706154	0.892833	0.99
Venezuela (Bolivarian Republic of)	14.9	87	8.6	24	79.0518	99.97	21	3.2	2.1	29.3485	75.3157	99.9998	89.664	1.00744	0.97313	1.07562	1.68973	6.87723	62	1.05	99.1078	17.1	32.078	0.39	12.2975	0.929048	0.87	0.785	0.563636	0.640674	0.0003	0.93	0.936	0.65	0.256301	0.845723	0.999999	0.937358	0.99504	0.961614	0.955518	0.893065	0.327037	0.38	1	0.991078	0.736923	0.946537	0.61
Yemen	41.9	69	32	0	60.6954	100	57	5.2	3.2	22.5629	53.689	97.488	50.6247	1.88055	0.8405	0.68814	0.44191	5.14743	6.7	1.05	72.041	29.9	66.671	1	1.0638	0.800476	0.69	0.2	1	0.724112	0	0.81	0.896	0.466667	0.184873	0.710556	0.981392	0.700756	0.412967	0.772143	0.816553	0.913474	0.23833	0.933	1	0.72041	0.54	0.888882	0
Zimbabwe	70.7	87	11	3.7	108.937	100	53	30.9	0.9	38.3028	55.243	99.9379	49.5702	1.9661	0.98275	0.97947	0.89687	8.42933	6.7	1.02	32.3	9.4	58.893	0.737339	81.1304	0.663333	0.87	0.725	0.932727	0.504831	0	0.823333	0.382	0.85	0.350555	0.720269	0.99954	0.694365	0.355933	0.975357	0.987924	0.984011	0.406632	0.933	0.925	0.323	0.855385	0.901845	0.262661
[truncated: 10 more columns]

## Sheet: Table S4
	Table S4- The country ranking assessed by the SCDI and HDI from 2006 to 2015
	SCDI											HDI
	2006	2007	2008	2009	2010	2011	2012	2013	2014	2015		2006	2007	2008	2009	2010	2011	2012	2013	2014	2015
Albania	46	48	47	44	46	46	42	42	46	45		68	70	87	70	64	70	70	95	75	75
Algeria	106	112	108	96	96	98	100	95	97	97		102	104	91	104	84	96	93	93	84	83
Angola	112	108	102	109	109	117	117	116	120	120		147	143	139	143	146	148	148	149	150	150
Argentina	80	79	79	75	75	74	76	77	80	79		45	49	50	49	46	45	45	49	45	45
Armenia	131	132	129	131	131	130	131	129	130	127		83	84	76	84	76	86	87	87	85	84
Australia	69	71	71	73	72	69	75	76	76	82		2	2	2	2	2	2	2	2	2	2
Austria	14	12	10	9	9	12	9	6	8	8		15	14	22	14	25	19	18	21	24	24
Bahrain	103	106	106	107	106	106	109	110	107	109		36	39	39	39	39	42	48	44	46	47
Barbados	60	52	57	57	65	70	69	73	71	73		37	37	51	37	42	47	38	59	54	54
Belarus	27	29	31	32	27	28	28	29	31	34		67	68	57	68	61	65	50	53	51	52
Belgium	87	88	85	89	89	87	87	96	96	96		17	17	20	17	18	18	17	21	21	22
Belize	40	43	44	78	48	50	47	38	39	39		88	93	81	93	78	93	96	84	103	103
Benin	116	115	116	117	113	111	111	113	116	114		157	161	151	161	134	167	166	165	168	167
Bhutan	7	4	4	4	4	4	4	3	3	2		130	132		132		141	140	136	132	132
Bolivia (Plurinational State of)	66	64	55	51	55	54	56	55	53	51		110	113	106	113	95	108	108	113	118	118
Botswana	126	129	130	129	130	127	129	128	127	128		123	125	102	125	98	118	119	109	107	108
Brazil	26	26	26	24	23	25	27	21	24	21		73	75		75	73	84	85	79	79	79
Brunei Darussalam	12	14	13	10	12	13	12	14	12	13		28	30	30	30	37	33	30	30	30	30
Bulgaria	75	74	70	72	76	79	80	80	81	81		57	61	55	61	58	55	57	58	57	56
Burkina Faso	111	111	109	108	108	108	108	109	105	106		173	177	169	177	161	181	183	181	185	185
Burundi	85	85	82	68	67	66	73	74	79	74		172	174	168	174	166	185	178	180	184	184
Cambodia	82	83	87	74	83	73	70	68	58	56		134	137	124	137	124	139	138	136	143	143
Cameroon	77	80	80	80	74	71	72	69	70	71		148	153	142	153	131	150	150	152	154	153
Canada	5	6	8	7	7	8	8	12	11	11		4	4	9	4	8	6	11	8	9	10
Cape Verde	113	113	111	112	111	112	112	112	112	111		118	121	115	121	118	133	132	123	122	122
Central African Republic	118	121	118	120	119	118	118	121	119	118		175	179	171	179	159	179	180	185	188	188
Chile	65	66	66	61	62	62	62	65	68	65		41	44	41	44	45	44	40	41	38	38
China	84	87	86	87	84	80	78	79	75	76		97	92	95	92	89	101	101	91	91	90
Colombia	43	41	42	39	40	40	39	39	38	31		78	77	88	77	79	87	91	98	95	95
Costa Rica	4	5	6	5	5	6	6	16	18	17		51	54	64	54	62	69	62	68	66	66
Côte d'Ivoire	83	82	84	82	78	78	77	75	73	69		160	163	159	163	149	170	168	171	172	171
Croatia	36	36	34	33	37	38	44	46	45	44		43	45	43	45	51	46	47	68	46	45
Cyprus	76	77	73	77	79	84	90	93	95	95		30	32	29	32	35	31	31	32	34	33
Czech Republic	25	23	23	25	24	24	25	27	27	27		33	36	27	36	28	27	28	28	28	28
Democratic Republic of the Congo	101	91	91	94	95	90	85	87	86	87		174	176	174	176	168	187	186	186	178	176
Denmark	11	11	11	12	11	11	7	11	10	10		14	16	9	16	19	16	15	10	6	5
Dominican Republic	102	97	97	99	98	102	96	97	88	90		87	90	93	90	88	98	96	102	101	99
Ecuador	71	67	75	63	61	60	63	58	56	55		75	80	89	80	77	83	89	98	87	89
Egypt	117	117	115	119	121	122	124	124	124	124		119	123	98	123	101	113	112	110	111	111
El Salvador	55	57	48	76	68	75	53	48	66	66		104	106	107		90	105	107	115	115	117
Eritrea	128	125	126	127	127	126	126	125	125	126		162	165		165		177	181	182	181	179
Estonia	6	7	5	8	14	10	10	8	7	9		38	40	31	40	34	34	33	33	31	30
Ethiopia	109	105	103	104	105	101	95	91	89	86		168	171	163	171	157	174	173	173	174	174
Fiji	13	16	16	19	19	19	18	18	19	19		105	108	78	108	86	100	96	88	91	91
Finland	8	8	7	6	8	5	5	5	6	5		12	12	16	12	16	22	21	24	23	23
France	29	27	28	29	28	31	31	30	33	32		10	8	18	8	14	20	20	20	22	21
Gabon	49	42	43	41	39	42	41	41	43	40		101	103	103		93	106	106	112	109	109
Gambia	129	128	125	128	128	128	127	127	129	129		165	168	156	168	151	168	165	172	173	173
Georgia	100	102	110	110	107	110	113	111	111	112		89	89	70	89	74	75	72	79	71	70
Germany	23	24	25	23	22	22	22	24	23	24		20	22	5	22	10	9	5	6	4	4
Ghana	17	15	17	16	17	16	17	17	14	16		151	152	127	152	130	135	135	138	140	139
Greece	74	76	76	79	87	96	99	106	101	102		23	25	25	25	22	29	29	29	29	29
Guatemala	50	54	50	48	42	39	34	37	42	47		120	122	118	122	116	131	133	125	126	125
Guyana	41	46	52	49	51	47	52	59	57	58		111	114	112	114	104	117	118	121	125	127
Honduras	57	60	67	71	80	89	92	82	65	68		108	112	117	112	106	121	120	129	130	130
Hungary	35	35	39	42	43	41	43	44	41	41		38	43	37	43	36	38	37	43	43	43
Iceland	1	1	1	1	1	1	1	1	1	1		3	3	13	3	17	14	13	13	9	9
India	127	126	127	126	126	131	125	126	126	125		131	134	125	134	119	134	136	135	131	131
Indonesia	42	38	32	31	35	32	26	28	28	28		108	111	103	111	108	124	121	108	113	113
Iran (Islamic Republic of)	107	109	112	114	117	116	119	119	117	117		85	88	80	88	70	88	76	75	68	69
Ireland	16	18	20	22	26	27	32	32	30	29		5	5	5	5	5	7	7	11	8	8
Israel	86	86	83	88	85	85	84	85	84	85		26	27	17	27	15	17	16	19	19	19
Italy	59	56	56	59	60	63	67	70	78	78		18	18	22	18	23	24	25	26	27	26
Jamaica	97	101	105	105	103	92	86	89	83	83		89	100	81	100	80	79	85	96	94	94
Japan	51	50	54	54	56	56	58	60	63	62		10	10	15	10	11	12	10	17	17	17
Jordan	114	114	114	113	112	114	116	117	113	115		91	96	63	96	82	95	100	77	85	86
Kazakhstan	115	118	117	115	115	115	114	114	115	116		78	82	64	82	66	68	69	10	56	56
Kenya	104	104	104	106	110	105	102	102	94	92		143	147	134	147	128	143	145	147	147	146
Kuwait	88	90	89	92	93	104	103	103	100	101		29	31	44	31	47	63	54	46	50	51
Kyrgyzstan	108	110	113	111	118	109	110	108	108	108		117	120	113	120	109	126	125	125	120	120
Lao People's Democratic Republic	45	44	37	35	30	26	24	19	17	15		129	133	131	133	122	138	138	139	137	138
Latvia	9	9	9	18	20	17	14	9	13	12		48	48	38	48	48	43	44	48	44	44
Lebanon	94	93	98	100	104	103	101	100	102	104		78	83	62	83		71	72	65	74	76
Lesotho	137	136	135	135	135	135	135	134	136	136		153	156	150	156	141	160	158	162	161	160
Liberia	96	84	69	58	50	52	50	49	54	54		166	169	166	169	162	182	174	175	177	177
Lithuania	22	22	24	26	32	30	29	26	26	26		44	46	34	46	44	40	41	35	37	37
Luxembourg	31	32	35	34	34	33	33	34	32	33		8	11	14	11	24	25	26	21	20	20
Madagascar	79	81	88	83	86	86	89	90	91	91		141	145	140	145	135	151	151	155	157	158
Malawi	58	65	64	56	59	58	61	62	61	59		158	160	162	160	153	171	170	174	170	170
Malaysia	24	25	22	21	21	21	20	20	20	20		64	66	59	66	57	61	64	62	59	59
Mali	133	133	133	132	133	133	133	133	133	133		176	178	164	178	160	175	182	176	175	175
Malta	93	94	99	103	102	94	97	92	93	94		33	38	40	38	33	36	32	39	35	33
Mauritania	138	138	138	138	138	138	138	138	138	138		148	154	147	154	136	159	155	161	155	157
Mauritius	28	33	36	36	33	35	38	36	35	36		77	81	67	81	72	77	80	63	64	64
Mexico	73	73	78	85	88	88	88	88	92	93		51	53	68	53	56	57	61	71	77	77
Morocco	119	120	120	118	120	120	120	118	118	119		127	130	122	130	114	130	130	129	123	123
Namibia	134	134	136	136	134	134	134	135	135	135		126	128	120	128	105	120	128	127	126	125
Nepal	105	103	95	93	91	81	83	81	72	75		140	144	137	144	138	157	157	145	144	144
Netherlands	64	63	63	60	66	64	66	67	69	70		6	6	7	6	7	3	4	4	6	7
New Zealand	10	10	12	13	10	14	16	13	15	14		19	20	8	20	3	5	6	7	13	13
Nicaragua	30	28	29	27	25	23	23	25	25	25		120	124	119	124	115	129	129	132	124	124
Niger	135	135	134	134	136	136	136	136	134	134		179	182	173	182	167	186	186	187	187	187
Norway	2	2	2	2	2	2	2	2	2	3		1	1	1	1	1	1	1	1	1	1
Oman	99	100	100	101	101	100	98	101	98	98		53	56	77	56		89	84	56	53	52
Pakistan	123	116	119	116	116	119	115	115	114	113		138	141	130	141	125	145	146	146	148	147
Panama	39	40	41	45	45	44	37	43	40	43		59	60	61	60	54	58	59	65	60	60
Paraguay	15	13	15	14	13	9	11	10	9	7		99	101	100	101	96	107	111	111	110	110
Peru	89	89	90	86	81	83	79	78	74	72		81	78	84	78	63	80	77	82	89	87
Philippines	54	51	51	50	54	53	48	54	60	63		103	105	107		97	112	114	117	114	116
Poland	33	30	27	28	29	29	30	31	29	30		40	41	36	41	41	39	39	35	36	36
Portugal	37	39	40	38	38	43	54	51	50	50		31	34	41	34	40	41	43	41	41	41
Qatar	95	99	94	97	97	99	106	104	106	105		32	33	28	33	38	37	36	31	33	33
Republic of Korea	47	49	49	47	49	51	49	52	52	52		24	26	19	26	12	15	12	15	18	18
Republic of Moldova	67	68	62	62	63	59	57	57	55	57		114	117	105	117	99	111	113	114	105	107
Romania	34	31	30	30	31	36	35	33	34	37		61	63	48	63	50	50	56	54	51	50
Russian Federation	44	45	45	46	47	48	46	47	47	46		72	71	54	71	65	66	55	57	48	49
Rwanda	52	58	61	53	53	55	55	50	48	48		164	167	156	167	152	166	167	151	162	159
Saudi Arabia	122	119	121	122	122	121	121	122	121	122		56	59	45	59	55	56	57	34	38	38
Senegal	125	127	128	125	125	123	122	123	123	121		163	166	143	166	144	155	154	163	163	162
Serbia	61	61	53	52	57	61	65	64	64	64		65	67	66	67	60	59	64	77	66	66
Sierra Leone	110	107	101	102	100	97	94	98	99	99		177	180	170	180	158	180	177	183	176	179
Slovakia	38	37	38	40	44	45	45	45	44	42		42	42	35	42	31	35	35	37	40	40
Slovenia	18	20	19	17	16	18	19	23	22	23		27	29	21	29	29	21	21	25	25	25
South Africa	132	130	131	130	129	129	130	131	131	131		125	129	111	129	110	123	121	118	119	119
Spain-	56	55	60	65	70	76	82	84	85	84		15	15	26	15	20	23	23	27	26	27
Sri Lanka	48	47	46	43	41	37	40	35	37	38		100	102	73	102	91	97	92	73	72	73
Sudan	130	131	132	133	132	132	132	132	132	132		145	150	153	150	154	169	171	166	165	165
Swaziland	78	75	77	69	71	65	60	56	51	53		137	142	132	142	121	140	141	148	149	148
Sweden	3	3	3	3	3	3	3	4	4	4		6	7	11	7	9	10	7	12	15	14
Switzerland	20	21	21	20	18	20	21	22	21	22		8	9	4	9	13	11	9	3	3	2
Syrian Arab Republic	120	123	122	121	123	125	128	130	128	130		107	107	101		111	119	116	118	145	149
Tajikistan	90	96	93	91	90	91	93	94	103	100		123	127	121	127	112	127	125	133	129	129
Thailand	19	19	18	15	15	15	13	15	16	18		84	87	86	87	92	103	103	89	88	87
The former Yugoslav Republic of Macedonia	68	70	72	67	64	67	68	66	67	67		70	72	74	72	71	78	78	84	83	82
Togo	72	72	74	84	77	68	64	63	62	60		156	159	153	159	139	162	159	166	167	166
Trinidad and Tobago	53	53	58	55	52	49	51	53	49	49		61	64	57	64	59	62	67	64	64	65
Tunisia	91	92	92	95	99	107	105	105	104	103		97	98	85	98	81	94	94	90	97	97
Turkey	98	98	96	98	94	93	91	86	90	88		76	79	81	79	83	92	90	69	72	71
Turkmenistan	124	122	124	124	124	124	123	120	122	123		106	109		109	87	102	102	103	111	111
Uganda	81	78	81	81	82	77	81	83	82	80		155	157	148	157	143	161	161	164	165	163
Ukraine	63	59	59	64	73	82	74	72	87	89		82	85	71	85	69	76	78	83	81	84
United Kingdom	32	34	33	37	36	34	36	40	36	35		20	21	12	21	26	28	26	14	16	16
United Republic of Tanzania	70	69	68	70	69	72	71	71	77	77		148	151	152	151	148	152	152	159	152	151
United States	62	62	65	66	58	57	59	61	59	61		12	13	3	13	4	4	3	5	11	10
Uruguay	21	17	14	11	6	7	15	7	5	6		46	50	52	50	52	48	51	50	54	54
Venezuela (Bolivarian Republic of)	92	95	107	90	92	95	104	99	109	107		60	58	60	58	75	73	71	67	70	71
Yemen	136	137	137	137	137	137	137	137	137	137		138	140	145	140	133	154	160	154	159	168
Zimbabwe	121	124	123	123	114	113	107	107	110	110				160		169	173	172	156	158	154

## Sheet: Table S5
Table S5 – The country rankings assessed by the SCDI, the HDI and the CDI
	Ranking
Countries	SCDI, 138 countries (for the year 2015)	HDI, 186 countries (for the year 2015)	CDI, 140 countries (for the year 2012)
Afghanistan		169
Albania	45	75	75
Algeria	97	83	50
Andorra		32
Angola	120	150	119
Antigua and Barbuda		62
Argentina	79	45	24
Armenia	127	84	68
Australia	82	2	16
Austria	8	24	15
Azerbaijan		78	87
Bahamas		58
Bahrain	109	47	30
Bangladesh		139	107
Barbados	73	54
Belarus	34	52	33
Belgium	96	22	12
Belize	39	103	31
Benin	114	167	105
Bhutan	2	132	91
Bolivia (Plurinational State of)	51	118	70
Bosnia and Herzegovina		81
Botswana	128	108	89
Brazil	21	79	36
Brunei Darussalam	13	30
Bulgaria	81	56
Burkina Faso	106	185	138
Burundi	74	184	124
Cambodia	56	143	93
Cameroon	71	153	104
Canada	11	10	6
Cape Verde	111	122
Central African Republic	118	188	136
Chad		186	139
Chile	65	38	22
China	76	90	29
Colombia	31	95	52
Comoros		160	100
Congo		135	111
Cook Islands
Costa Rica	17	66	25
Côte d'Ivoire	69	171	128
Croatia	44	45	17
Cuba		68	21
Cyprus	95	33
Czech Republic	27	28	28
Democratic People's Republic of Korea
Democratic Republic of the Congo	87	176	137
Denmark	10	5	20
Djibouti		172	135
Dominica		96
Dominican Republic	90	99	76
Ecuador	55	89	40
Egypt	124	111	53
El Salvador	66	117	48
Equatorial Guinea		135	127
Eritrea	126	179	132
Estonia	9	30
Ethiopia	86	174	126
Fiji	19	91
Finland	5	23	14
France	32	21	5
Gabon	40	109	88
Gambia	129	173	117
Georgia	112	70	43
Germany	24	4	3
Ghana	16	139	109
Greece	102	29
Grenada		79
Guatemala	47	125	72
Guinea		183	121
Guinea-Bissau		178	122
Guyana	58	127	74
Haiti		163	125
Honduras	68	130	63
Hungary	41	43
Iceland	1	9	11
India	125	131	112
Indonesia	28	113	82
Iran (Islamic Republic of)	117	69	60
Iraq		121	81
Ireland	29	8	18
Israel	85	19
Italy	78	26	4
Jamaica	83	94	66
Japan	62	17	1
Jordan	115	86	45
Kazakhstan	116	56	51
Kenya	92	146	102
Kiribati		137
Kuwait	101	51	44
Kyrgyzstan	108	120	69
Lao People's Democratic Republic	15	138	106
Latvia	12	44
Lebanon	104	76	61
Lesotho	136	160	114
Liberia	54	177	131
Libya		102
Lithuania	26	37
Luxembourg	33	20	13
Madagascar	91	158	103
Malawi	59	170	98
Malaysia	20	59	42
Maldives		105	71
Mali	133	175	133
Malta	94	33
Marshall Islands
Mauritania	138	157	116
Mauritius	36	64	65
Mexico	93	77	35
Micronesia (Fed. States of)		127
Monaco
Mongolia		92	59
Montenegro		48
Morocco	119	123	77
Mozambique		181	115
Myanmar		145	94
Namibia	135	125	90
Nauru
Nepal	75	144	113
Netherlands	70	7	10
New Zealand	14	13
Nicaragua	25	124	57
Niger	134	187	140
Nigeria		152	130
Niue
Norway	3	1	8
Oman	98	52	83
Pakistan	113	147	120
Palau		60
Panama	43	60	41
Papua New Guinea		154
Paraguay	7	110	58
Peru	72	87	38
Philippines	63	116	80
Poland	30	36
Portugal	50	41
Qatar	105	33	39
Republic of Korea	52	18
Republic of Moldova	57	107	56
Romania	37	50	34
Russian Federation	46	49	37
Rwanda	48	159	99
Saint Kitts and Nevis		74
Saint Lucia		92
Saint Vincent and the Grenadines		99
Samoa		104
San Marino
Sao Tome and Principe		142	86
Saudi Arabia	122	38	64
Senegal	121	162	108
Serbia	64	66
Seychelles		63
Sierra Leone	99	179	134
Singapore		5
Slovakia	42	40
Slovenia	23	25
Solomon Islands		156
Somalia			141
South Africa	131	119	84
South Sudan		181
Spain	84	27	2
Sri Lanka	38	73	73
State of Palestine		114
Sudan	132	165	129
Suriname		97	67
Swaziland	53	148	95
Sweden	4	14	19
Switzerland	22	2	7
Syrian Arab Republic	130	149	54
Tajikistan	100	129	85
Thailand	18	87	49
The former Yugoslav Republic of Macedonia	67	82	32
Timor Leste		133	118
Togo	60	166	110
Tonga		101
Trinidad and Tobago	49	65	55
Tunisia	103	97	26
Turkey	88	71	47
Turkmenistan	123	111
Tuvalu
Uganda	80	163	97
Ukraine	89	84
United Arab Emirates		42	62
United Kingdom	35	16	9
United Republic of Tanzania	77	151	92
United States	61	10	23
Uruguay	6	54	27
Uzbekistan		105
Vanuatu		134
Venezuela (Bolivarian Republic of)	107	71	46
Viet Nam		115	79
Yemen	137	168	123
Zambia		139	101
Zimbabwe	110	154	96

## Sheet: Table S6
Table S6 – The country classification assessed by the SCDI and the HDI
Country	Sustainable child development level	Human development level
Albania	Very high	High
Algeria	Medium	High
Angola	Low	Low
Argentina	Medium	Very high
Armenia	Low	High
Australia	Medium	Very high
Austria	Very high	Very high
Bahrain	Medium	Very high
Barbados	Medium	High
Belarus	High	High
Belgium	Medium	Very high
Belize	High	High
Benin	Medium	Low
Bhutan	Very high	Medium
Bolivia (Plurinational State of)	High	Medium
Botswana	Low	Medium
Brazil	High	High
Brunei Darussalam	Very high	Very high
Bulgaria	Medium	High
Burkina Faso	Medium	Low
Burundi	Medium	Low
Cambodia	Medium	Medium
Cameroon	Medium	Low
Canada	Very high	Very high
Cape Verde	Medium	Medium
Central African Republic	Low	Low
Chile	Medium	Very high
China	Medium	High
Colombia	High	High
Costa Rica	High	High
Côte d'Ivoire	Medium	Low
Croatia	High	Very high
Cyprus	Medium	Very high
Czech Republic	High	Very high
Democratic Republic of the Congo	Medium	Low
Denmark	Very high	Very high
Dominican Republic	Medium	High
Ecuador	Medium	High
Egypt	Low	Medium
El Salvador	Medium	Medium
Eritrea	Low	Low
Estonia	Very high	Very high
Ethiopia	Medium	Low
Fiji	High	High
Finland	Very high	Very high
France	High	Very high
Gabon	High	Medium
Gambia	Low	Low
Georgia	Medium	High
Germany	High	Very high
Ghana	High	Medium
Greece	Medium	Very high
Guatemala	High	Medium
Guyana	Medium	Medium
Honduras	Medium	Medium
Hungary	High	Very high
Iceland	Very high	Very high
India	Low	Medium
Indonesia	High	Medium
Iran (Islamic Republic of)	Medium	High
Ireland	High	Very high
Israel	Medium	Very high
Italy	Medium	Very high
Jamaica	Medium	High
Japan	Medium	Very high
Jordan	Medium	High
Kazakhstan	Medium	High
Kenya	Medium	Medium
Kuwait	Medium	Very high
Kyrgyzstan	Medium	Medium
Lao People's Democratic Republic	Very high	Medium
Latvia	Very high	Very high
Lebanon	Medium	High
Lesotho	Low	Low
Liberia	Medium	Low
Lithuania	High	Very high
Luxembourg	High	Very high
Madagascar	Medium	Low
Malawi	Medium	Low
Malaysia	High	High
Mali	Low	Low
Malta	Medium	Very high
Mauritania	Low	Low
Mauritius	High	High
Mexico	Medium	High
Morocco	Low	Medium
Namibia	Low	Medium
Nepal	Medium	Medium
Netherlands	Medium	Very high
New Zealand	Very high	Very high
Nicaragua	High	Medium
Niger	Low	Low
Norway	Very high	Very high
Oman	Medium	High
Pakistan	Medium	Medium
Panama	High	High
Paraguay	Very high	Medium
Peru	Medium	High
Philippines	Medium	Medium
Poland	High	Very high
Portugal	High	Very high
Qatar	Medium	Very high
Republic of Korea	High	Very high
Republic of Moldova	Medium	Medium
Romania	High	Very high
Russian Federation	High	Very high
Rwanda	High	Low
Saudi Arabia	Low	Very high
Senegal	Low	Low
Serbia	Medium	High
Sierra Leone	Medium	Low
Slovakia	High	Very high
Slovenia	High	Very high
South Africa	Low	Medium
Spain	Medium	Very high
Sri Lanka	High	High
Sudan	Low	Low
Swaziland	Medium	Low
Sweden	Very high	Very high
Switzerland	High	Very high
Syrian Arab Republic	Low	Low
Tajikistan	Medium	Medium
Thailand	High	High
The former Yugoslav Republic of Macedonia	Medium	High
Togo	Medium	Low
Trinidad and Tobago	High	High
Tunisia	Medium	High
Turkey	Medium	High
Turkmenistan	Low	Medium
Uganda	Medium	Low
Ukraine	Medium	High
United Kingdom	High	Very high
United Republic of Tanzania	Medium	Low
United States	Medium	Very high
Uruguay	Very high	High
Venezuela (Bolivarian Republic of)	Medium	High
Yemen	Low	Low
Zimbabwe	Medium	Low
